# Supplementary material
Source: Preprints.org preprint supplement (doi:10.20944/preprints202107.0613.v1)
Supplement: Supplementary file 1 [file supplementary]

## Sheet: Proteins
Gene ID	Gene Name	Protein sequence
CCACVL1_04197	ccMGT01	MGEWVIGAFINLFGSIAINFGTNLLKLGHNERERHSLMDGEGIAGKIPLKPIIYFQTWRVGILFFMLGNCLNFISFGYAAQSLLAALGSIQFVSNIAFAYFVLNKMVTVKVLVATAFIVLGNIFLVAFGNHQSPVYTPEQLAEKYSNITFLFYCLILVLVVALHHTIYRRGELLHTVSGQDLRPYWKMLLPFSYAIVSGAVGSCSVLFAKSLSNLLRLAMSNGYQLHSWFTYSMLLLFLSTAGFWMARLNEGLALFDAILIVPMFQIAWTFFSICTGFIYFQEYQVFDALRTTMFILGMMSVFIGISLLAPDESRGGELKDNSHLDSVKSSSNPAETDRLILPSEDAQNKEMKSFTHGMMMKIADMLGKAKSAFSLSLGFGEDSINASAVLVMPMVSSK…
CCACVL1_06282	ccMGT02	MKVQTPANGQTEASSTRLDGQKVNEPSSSYESRERENVAVSFEEYRDGQSLQLGQFPAMERYDGSCWVPIGWERISELVKNVQVNGGWASQQFDLMDNEEDFTVADLAAPYWERPAGPIWWCHLAAGHPTAVSWLSNAQWLHPAVSLALRDESRLISERMKHLLYEVPVRVAGGLLFELLGQSAGDPFNEEDDIPVVLRSWQAHNFLLTVLHIKGNVSSVNVLGIAEVQELLSAGGHNVPRTVHEVIAHLACRLTRWDDRLFRKSIFGAADEIELMFMNRRNREDMNLFGVILNQEIRRLSKQVIRVKWSLHAREEIVFELLQHLRGNAARVLLEGIRKSTREMIEEQEAVRGRLFTIQDVMQSTIRAWLQDRSLRVTHNLAVFGGVGLVLTIITGLFG…
CCACVL1_06479	ccMGT03	MEESHGHILPFDVPESTTSSYNNERLNSSTQSSRVSGFPGVKKRGHSSRSWIKIDLDGNVKVLELDKAKIMRQCSLPSRDLRLLDPLFIYPSTILGREKAIVVSLEQIRCIITAEEVILMNSLERNVVQYESELCKRLQSNKDQADDLPFEFRALELALELTCMSLDAQVKELEMEIYPVLDELASSINTLNLERVRRLKGNLLALTQRVQKVRDELEHLMDDDGDMAEMYLTEKKLRSEGNTPTELNTLSIFSGGTRVGSKSAPVSPVASTNGAHRLQRAFSSIVTSSKQGSLISSSDSGENIEQLEMLLEAYFVVIDHTLSKLLSLKEYIDDTEDLINIKLGNVQNHLIQFELLLTAATFVATLFAAVAGVFGMNLATSVFDYPSGFNWVLVITGFG…
CCACVL1_06907	ccMGT04	MGMSSDNVRGLVLALSSSIFIGSSFIIKKKGLKKAGATGLRAGQGGYSYLYEPFWWAGMITMIVGEIANFAAYAYAPAILVTPLGALSIIFSAVLAHFILEEKLHIFGVLGCALCVVGSTTIVLHAPQERNIDSVTEVWGLATEPGFLVYTLLVVILVSILIFRYVPRYGQTHMIVYVGICSLMGSLTVMCVKAVGIAVKLSFSGMNQFKYYQTWVFTLVVTFCCLLQVNYLNKALDTFNTAVISPVYYVMFTTFTIIASMIMFKDWDSQGAADIATELCGFITILSGTFLLHKTIDMGKTPSVRSPVFTSPDLSPSSSSR
CCACVL1_10058	ccMGT05	MDVFELPETGQGLQSWIRIDSSGNSQVIEIDKLSIIARCGISTRDLRILDPLFVYPTTILGREKAIVANLEKIRCIITADEVLLLNSLDRNVLQFVMELQKRLVANGAAALNPRGSSNRSFRSTSSYSPFEFRALAVALEVVSGSLNFEASEIKSEAYPLLDELTSYISTLNLERVRGLKSRLVALTRRIHKIRDEIEKIMDDNEYMAEMYLSEKKRRMESPSLISDRVSSPLMQISDEGLFEASDPTIISSLSSPSESHRVTKNLNNNNGLRNRHKSMVMSSEHTARSVEELESLLEAYFVVIDNILTKLITLKEYIDDTENFINIQMNNLRNRLIQFELLLTSATLVMAIFGAIIGIFGINFPVPLFTNERTIKLILIFTSISAVLIYCGLVCFFKW…
CCACVL1_10059	ccMGT06	MDDFELPETGQGLQSWIQIDSSGNSQVIEIDKLSIIARCGISTRDLRILDPLFVYPTTILGRENAIVANLEKIRCIITADEVLLLSSLDEKVVQFVVELQRRLVVNGAAALDPRGSSRSPFEFRALAVALEVVSGLLNFEATELESQAYPLLDELTSKISTLNLERVRRLKSRLVALTRRVQKVRDEIEHLMDDYEGMAEMCLTEKKKRMESSSYSDQSLLGFRSNDGLSASAPVSPVSSPPESRRREKSLSIARSRHESMRSSESIKKLEMVLEAYFVVIDHRTLNKLTTLKEYIDDTEDFINIQL
CCACVL1_10060	ccMGT07	HLVTFEQVGNSSFVPKAAELEIEAYPLLDELTSKISTLNLERVRRLKSRLVALTRRVQKVRDEIEQLMDDDGDMAEMYLTEKKRRMESSFYGDQSLLGFRSNDGLSASAPVSPVASPPESRRLEKSLSIARSRHESMRSSESTTESIEELEMLLEAYFVVIDSTLNKLTSLKEYIDDTEDFINIQLDNVRNQLIQFELLLTTATFVVAIFGVVAGIFGMNFEIPMFDDAGAFKWVLIITGISGVVIFSAFVWFFKYRRLMPL
CCACVL1_14415	ccMGT08	MAREIYLVPIEASLKKKTAVTTNWISIDADGQGEILDVDKYAIMRRVQIHARDLRILDPLLSYPSTILGREKVVVLNLEHIKAIITADEVLLRDPLDDNVIPIVAELKRRLPQYNLTSQGQGEEEENPGLRNDMDTGEENEFPFEFRALEVALEAICSFLDARTRELETDTYPALDELTSMISSRNLDRVRKLKSAMTRLTNRVQKVRDELEQLLDDDDDMADLYLSRKLAGASSPVSGSGAPNWYPSSPTIGSKISRTSRASAVTVHEDNDVEELEMLLEAYFMQIDSTLNKLTTLREYIDDTEDYINIQLDNHRNQLIQLELFLSSGTVCLSIYSLVAAIFGMNIPYTWKEGHGYMFKWVVILTGILCASTFTFIISYARHKGLVGS
CCACVL1_16275	ccMGT09	MGVVRSWSEGMSSDNVKGLVLALSSSLFIGASFIVKKKGLKKAGASGIRAGVGGYSYLLEPLWWVGMITMVVGEIANFAAYAFAPAILVTPLGALSIIISAALAHIILRERLHTFGILGCVLCVVGSTTIVLHAPPERQIESVTDVWDLATEPGFLFYTALVLTAVFILIFHFVPQYGQTHIMVYIGVCSLVGSISVMSVKALGIALKLTFSGMNQLVYPQTWAFTLVVVSCVLTQMNYLNKALDTFNTAVVSPIYYVMFTSLTILASVIMFKDWDRQTPTQIITEMCGFVTILSGTFLLHKTKDMVDGPSLTTSLSSVDRSTIVLFLFELGAEILTSLAKLAEECCREGGLFTTSTSSIPSFLLKPTSKDSRSRQLLIRTGQCFLLNGFIFLGSLFVL…
CCACVL1_16701	ccMGT10	MGMSENSKGVILAVASSAFIGSSFILKKKGLKRAGATGARAGVGGYTYLVEPLWWAGMITMIIGEVANFVAYVYAPAVLVTPLGALSIIVSAVLAHFMLNERIQKMGIVGCVSCIVGSVVIVIHAPQEHALNSVLEIWNLATQPAFLIYVAATLSIVLALVLHFEPRYGQTNILVYLGICSLMGSLTVVSIKAIGIAIKLTLDGISQVAYPQTWFFVTVAAICVITQLNYLNKALDTFNAALVSPVYYVMFTTLTIIASVIMFKDWSGQNVSSIASEICGFITVLSGTIILHSTREQEPPPPVGTVTWYVSNDSIKSPEDEHLITLRSSDYYEP
CCACVL1_16896	ccMGT11	MGKGPFSLRRSFSRRRRPKSTTVPQLPAPGPNGAASSSSPPPPSAGNLIAGGGGGGGGAGAVVAGKGKKKTAGARLWMRFDRMGVSELVEYDKNAIIKRASIPARDLRILGPVFSHSSTILAREKAMVVNLEFIKAIVTAEEVLILDPLQQEVLQFVDQLRQQLPPKSAFRIQGAAAMDVNDSEMHVSTGGRWLPVPEAMEGFQCELPFEFQVLEIALEVVCSFLDKNVAELERDAYPVLDELARNVSTKNLEHVRSLKSNLTRLLARVQKVRDEIEHLLDDNEDMAQLYLTRKWIQNQQSEALLGAAASNSISATPPRLPRLSSTRSASIRSSHNLDDDDVEDLEMLLEAYFMQLDGTRNKILSVREYIDDTEDYVNIQLDNQRNELIQLQLTLTIAS…
CCACVL1_17107	ccMGT12	MRTQPPPPPSRLEDDPDLTPRPTPIPNQPLPVAAHRKKGTGVRAWLLLDSTSQTQVVEAGKHAIMRRTGLPARDLRILDPLLSYPSTILGRERAIVINLEHIKAIITSQEVLLLNSKDPSVTPFVDELQSRILCHYQATKAQEGAIDDTNCIIRTSSQHILPMSSQPHNQNEEAEEKQGLENPDGSKILPFEFVALEACLEAACSCLDNEARTLEQEAHPALDKLTSKISTLNLERVRQIKSRLVAITGRVQKVRDELEHLLDDDDDMAEMYLTEKQLLENSSTSSMNEGDDMDEGVLRPDINDRDSHGTRTSATHSAISKQFDVEELEMLLEAYFVQIDGTLNKLSTLREYVDDTEDYINIMLDDKQNHLLQMGVMLTTATLVISAFIVVAGIFGMNI…
CCACVL1_17163	ccMGT13	MELAQEDPAGEGEIEELVRVSSANIPLVETNQHRTHFPGMVRQKAYIFDSLGNYYNKEWDLAEGSGKEFCWYHVELPKGNQKLSQSAQYLIDVLCPPLKLQDILSLVSNGPFCGHVDGALVFRVNSPGPPSSNFTFRLSARVTENSVITVSLGRVPRLGFSPVGQSLLSEIPSVETPTFRGERREGSGIVIREHVLEFLLTMNHSEEADNPVPKSVSNLVVHIIDTHVDHLQDVVTKLEMELDSVELEMDRGGFALKKQMLDDRRFPKMHLNLQRLLQLIAQGEQVFPRVKEKCSSKHWFASEDMSSIEELILRLRRLKENVGFLANRVTAIQAGLDSWQSEQINRKLYYLSFLSIIFLPLSVITGVFGMNVGGVPWTVQKDPALKDGFLNVMILCVVM…
CCACVL1_25517	ccMGT14	MALTPSPSSSSYPNLLKLSAKSPSPPVNYLFLGSPWPNPILLQKNGVPLLPVVVKPSYKKIKCFARSSTEEDRLSEPETLAADNVDDDVDDGGREDPKLQQRQASAVATQRNTSSFSDSLSLGIRDPVYEVVEVKSNGVVSTRKINRRQLLKSSGLRPRDIRSVDPSLFLTNSAPSLLVREHAILLNLGSLRAIAMRDCVLIFDYNRKGGRAFMDTLLPRLNNMNGGPCMPFELEVVEAALLSRIQRLEQRLMDLEPRVQALLDVLPNKLTGDILEQLRISKQTLVELGSRAGALRQMLLDLLEDPHEIRRICIMGRNCTLKKGNDDVECSVPLEKQIAEEEEEEIEMLLENYLQRCESCHGQAERLLDSAKEMEDSIAVNLSARRLEVSRVELLLQVG…
CCACVL1_29622	ccMGT15	MGLSEDNLKGVVLALLSSGFIGASFIIKKKGLKRAAAVSGVRAGYGGYAYLLEPLWWLGMITMIVGEVANFVAYAFAPAILVTPLGALSIIVSAVLAHFILNEKLHLLGRLGCVMCISGSVIIVIHAPQESPITSVQEIWTMATQPAFLLYVSSVIVLVFLLIFHFVPRSGHSDVLVFTGICSLMGSLSALDTFNTAVVSPIYYVMFTSLTILASVIMFKDWDGQSSGSIISELCGFIVVLSGTILLNSTKDSDRGSSSRGCHSPLSPTLSTGLFGGNGESPEFEEENDLLP
CCACVL1_30870	ccMGT16	MNKVGNDYSNSMSNEMKKQDYNKNQYQSWSDAIGGDHLWTDGLICAFEFIQGQGQRKTLQQKAGAKVWSTRYGSKEASRKRIYAHEPEDSSVNNLANSPPLTDSAFTVKDTLCEKNCNHRNHNPGEELPRTYWKPIGWERVSELVQMVQVDDGWASQPVELIQNEDDVTVADLAAPYWDRPVGPTWWCHVAADHPSVNAWLSNAHWLHPAISIALRDESKLISERMKHLLYEVPVIVAGGLLFELLGQSAGDPLADEDEIPIVLRSWHAQNFLITSLHIKGSASNINVLGIAEVQEMLIAGGTNIPRTIHEVIAHLTCRLARWDDRIFRKSIFGEADEVELKFMNRRNHEDLHLFTIILNQEIRRLSTQVIRVKWSLHAREEIVFELLQHLKGNATRDL…
Gohir.A01G024300	ghMGT01	MTHVVPADPQVLVTVKKKAQPSRSWAVLDSNGETTLLDVDKYAIMHRVNIHARDLRILDPLLSYPSTILGRDGAIVLNLEHIKAIITAEEVLLRDPSGEYVIPVVQELQRHLPVVNAINQGPEAIGHIDAEAADECVSPFEFRALEVTLESICSFLAARTLELETAAYPALDELTSLISSRNLDRVRKLKSAMTRLTARVQKVRDALEQLLDDDDDMADLYLSRKLATSSPVSGSGAANWYAVSPTIGSKISKASRGSIATIHGDENDVEELEMLLEAYFMQIDGTLNKLTTLREYIDDTEDYINIQLDNHRNQLIQLELFLSSGSVCLSDSLVAAIFGMNIPFTWNDNHGYVFKWVVIISGLLSALLFILIMSYARLKGLVGS
Gohir.A01G182300	ghMGT02	MAVVQKWREGMSSDNVKGLVLALSSSLFIGASFIVKKKGLKKAGASGIRAGVGGYSYLLEPLWWAGMITMVVGEIANFAAYAFAPAILVTPLGALSIIISAVLAHIILRERLHTFGILGCILCVVGSTTIVLHAPQERQIESVTEVWDLATEPGFLFYTALVLTAVFILIYQFVPQYGQTHIMVYIGVCSLVGSISVMSVKALGIALKLTFSGTNQLVYPQTWAFTLVVITCVLTQMNYLNKALDTFNTAVVSPIYYVMFTSLTILASVIMFKDWDGQSPTQILTEMCGFVTILSGTFLLHKTKDMADGPGLSTSLSMRSLKHEEDDGFGEGIPLKRQDT
Gohir.A02G019800	ghMGT03	MKGMSMDNIRGLILAVSSSVFIGSSFIIKKQGLKKAGSSGPRAGQGGHSYLYEPWWWAGMITMIIGEIANFAAYAYAPAILVTPLGALSIIFSAVLAHFILKERLHIFGMLGCALCVVGSTTIVLHAPKERHIESVKQVSHLATEPGFLVYFWVVLAVVAVLIFRYVPRYGQTHLVVYIGICSLMGSLTVMGVKAVGIALKLSFGGMNQFKYFETWIFTIIVIFCCLLQINYLNKALDTFNTAVVCPVYYVMFTTFTIIASIIMFKDWNSQGGTEITTELCGFITILAGTFLLHKTKDMGKSSSGRLPVYTSPEPNTVSESR
Gohir.A03G203400	ghMGT04	MGLSDNLKGVILAVASSAFIGSSFILKKKGLKRGGASGIRAGVGGYTYLLEPLWWAGMITMIMGEIANFVAYIYAPAVLVTPLGALSIIVSACLAHFLLNERIQKMGIVGCVSCIVGSVVIVIHAPQEHTPSSVQDIWTLATQPAFLVYVVATLSAVLALVFHFEPHYGQTNILVYLGICSLMGSLTVVSIKAIGIAIKLTLDGMSQIAYPQTWFFLTVAVICVITQLIYLNKALDTFNATLVSPVYYVMFTTFTIIASVIMFKDWSGQNAGSIASEICGLITVLSGTIILHVTREQEPPPPPVGTVTWFINGDSLKSPEEEHLITHHRLDEYYEP
Gohir.A03G214800	ghMGT05	MAAVRRWSEGMSSDNIKGLVLAISSSLFIGASFIVKKKGLKKAGASGVRAGVGGYSYLLEPLWWIGMITMVVGEIANFAAYAFAPAILVTPLGALSIIISAVLAHIILREKLHTFGILGCALCVVGSTTIVLHAPQERQIESVTEVWDLATEPGFLFYTALVLTAVFILIFHFVPQYGQTHIMVYIGVCSLVGSISVMSVKALGIALKLTFSGMNQLLYPQTWAFTLVVASCVITQMNFLNKALDTFNTAVVSPIYYVMFTSLTILASVIMFKDWDRQTPTQIITEMCGFITILSGTFLLHKTKDMVDDYVQSGPSLTTSISMRSLKHEEEDGFDEGVPLKRQDTSRIP
Gohir.A04G121700	ghMGT06	MRFDAMGVSELVEYDKSTIIKRASIPARDLRILGPVFSHSSTILAREKAMVVNLEFIKAIVTAEEVLILDPLQQEVLQFVDQLRLQLPHKSANKTQGAGAVDVNDSETHVSTGGQWLPVPEAMEGLQCELPFEFQVLEIALEVVCSFLDKNVAELERDAYPVLDELARNVSTKNLEHVRSLKSNLTRLLARVQKVRDEIEHLLDDNEDMSNLYLTRKWIQNQQLEALSGGAASNSIITISPRLPRLSSNRSASLVSSHNLDDDDVEDLEMLLEAYFMQLDGTRNKILSVREYIDDTEDYVNIQLDNQRNELIQLQLTLTIASFAIAVETLVAGWFGMNIPFTWNNKEGIFEIFVGGITVGCVLIFLLILGYARWKKLLGS
Gohir.A04G130300	ghMGT07	MAAVRRWSEGMSSDNVKGLVLALSSSLFIGASFIVKKKGLKKAGASGIRAGSGGYSYLLEPLWWVGMITMVVGEIANFAAYAFAPAILVTPLGALSIIISAALAHIILREKLHTFGILGCVLCVVGSTAIVLHAPPERQIESVTEVWDLATEPGFLFYALLVLTAVFILIFHFVPQYGQSHIMVYIGVCSLVGSISVMSVKALGIALKLTFSGMNQLVYPQTWAFTLVVVTCVVTQMNYLNKALDAFNTAVVSPIYYVMFTTLTILASVIMFKDWDRQNPTQIITEMCGFVTILSGTFLLHKTKDMVDGTSLTSMSMRQLKHEEEDGFDESIPLKRQDSLRIIP
Gohir.A06G114600	ghMGT08	MADLKERLLPPKPQSAINIRDASYRPSASGRQPFQGMDLSGLKKRGQGLRSWIRVDTSGNSQIIEVDKFTMMRRCDLPARDLRLLDPLFVYPSTILGREKAIVVNLEQIRCIITADEVLLLNSLDSYVLQYVVELQRRLTSGVGEVWQSEGPELNRRRSSRGFDNVYGSTSPDYLPFEFRALEVALEAACTFLDSQAAELEIEAYPLLDELTSKISTLNLERVRRLKSRLVALTRRVQKVRDEIEQLMDDDGDMAEMYLTEKKSRMESSFYGDQSLVGFRSNDGLSASAPVSPVASPPELRRLEKSLSIARSRHESMRSSESATENIEELEMLLEAYFVLIDSTLNKLTSLKEYIDDTEDFINIQLDNVRNQLIQFELLLTTATFVVAIFGVVAGIFGM…
Gohir.A07G022000	ghMGT09	MWESICLTLAATAGNNIGKVLQKKGTGILPPLSFKFKVIRAYAVNKSWLIGFLIDISGALLMLRALSLAPVSIIQPVSGCGLAILSIFSHFYLQEVMNVIDWLGITLAGIGTIGVGAGGEEQVASSVSILQLPWLAFFVVILFVLLNGWLRICKRQRREQELMEYEVVEEIIYGLESGILFGTGMCLHGCIKTDGVIVVMDNGIGDIKIGFVFVQQGFSKMLIPLCVSISICCSGTGFYYQTRGLKHGRAIVISTCAAVASIVTGVLAGMLALGERLPSAPVARLSLLLGWLFIMMGVILLVSSTRLMRHLPWPLQNLIPSGADRNFSLRKTGSHRVKDPSPAAVIPATTLHHLIPTPAKEKA
Gohir.A07G121500	ghMGT10	MGMSQDNLRGFILALLSSVFIGASFIIKKKGLRRAAAVSGVRAGYGGYAYLLEPLWWLGMVTMIVGEVANFVAYAFAPAILVTPLGALSIIVSAILAHFMLKEKLHQLGVLGCIMCISGSVIIVIHAPQESPITSVQEIWAMATQPAFLLYLGSVIVLVVLLILHFAPRCGHTNVLVFTGICSLMGSLSVMSVKALGTALKLTFEGKNQLVYLETWFFMFIVATCVIIQMNYLNKALDTFNTAVVSPIYYVMFTSLTIIASVIMFKDWDSQNTGSIISELCGFIAVLCGTILLNSAKDSDRGSSFRGEHAPLSPTLSTGLFSGNRETLKHDEENELLPDDICLRKQEPY
Gohir.A07G209600	ghMGT11	MTRQVYFVPAAETQVASVKKKTAVTTSWVSVDAKGQGTVLDVDKYAIMRRVQIHARDLRVLDPMLSYPSTVLGREKVIVLNLEHIKAIITAEEVLLRDPFDDNVIPIVAELKRRLPQEKDLTCQGLGEEEEEHPGLRNDINTGEENEFPFEFRALEVALEAICSFLDARTRELETDTYPALDELTSKISSRNLDHVRKLKSAMTRLTNRVQKVRDELEQLLDDDDDMADLYLSRKLAVACSPVSVSGAPNWYPSSPTIGSKISRTSRASAVTVEEDNDVEELEMLLEAYFMQIDNTLNKLTTLREYIDDTEDYINIQLDNHRNQLIQLELFLSSGTVCLSIYSLVAAIFGMNIPYTWKEGHGYMFKWVVILTGLLCTSTFTSIISYARHKGLIGS
Gohir.A08G061600	ghMGT12	MAREAYLVPVVEAQVATLKKKTAVTTSWISIDAKGQSVILDVDKYAIMRRVQVHARDLRILDPMLSYPSTILGREKVIVLNLEHIKAIITAEEVLLRDPYDDNVIPIVAELKRRLPQDNLTCQDQGEEEEEHPSARNDMDTEEENEFPFEFRALEVALEAICSFLDARTRELEIDAYPALDELTSKISSRNLDRVRKLKSAMTRLTNRVQKVRDELEQLLDDDDDMTDLYLSRKLAGACSPVSSFSVPSWYPPSPTIGSKISRTSRASAVTVEEDNDVEELEMLLEAYFMQIDSTLNKLTTLREYIDDTEDYINIQLDNHRNQLIQLELFVSSGTVCLSIYSLVAAIFGMNIPYTWKEGHEYMFKWVVILTGLLCTSTFTSIVSYARHKGLIGS
Gohir.A09G086400	ghMGT13	MASTPTPPPSSYPNTLQFSVKSPSPFVHYLLFRSRWRNDSTISLQKSGVPPLPPLVRPSFKKKFKCFARSSSTEEDRLRESETLAGDNDGDDDGGREDTKVQQRQSDSFLLGIHEPVYEVVEVKSSGVSSKRKISRRQLLKSSGVRPRDIRSVDPSLFLTKTAPSLLVREHAILLNLGSLRAMAMKDRVLIFNYNSKGGKAFIDTLLPRLNNMNGAQCMPFELEVVEAALLSWIQRWERKLMNLEPRVQALLKMFPNKLTGDILEQLRISKQTLVELGSKAGALRQMLLDLLEDQDEIRRICIMGRRSTLKRENDDVESSLPSGKLIAEEQVEEIEMLLENYLQRCESCHGQAERLLDSAKEMEDSMAVNLSSRRLEVGRVELLLQVGAFCIGVGALVS…
Gohir.A10G123900	ghMGT14	MVHVVPADPQAVVAVKKKAQSSRSWVLLDSTGETTVLDVDKYAIMHRVNIHARDLRILDPLLSYPSTILGRDGAIVLNLEHIKAIITSEEVLLRDPSDENVVPVVEELKRRLPPVNAIQQGQDYTGGQNDVEGDEDESPFEFRALEVALESICSFLAARTLELETAAYPALDELTSQISSRNLDRVRKLKSAMTRLTARVQKVRDELEQLLDDDDDMADLYLSRKLAGTSPVSGSGAANWYLASPTIGSKISRASRASIATARGDENDVEELEMLLEAYFMQIDGTLNKLTTLREYIDDTEDYINIQLDNHRNQLIQLELFLSSGTVCLSIYSLVAAIFGMNIPYTWDTNHGYMFKWVVIVSGIFCATLFILIMSYARLKGLVGS
Gohir.A11G059200	ghMGT15	MPFVHSRFDNHCASCSEERSISSVEEIWEFATQPAFLLYTASAIATALVLILYCAPRYGQTNIIVYIGICSVIGSLTVMSIKAIGIAIKLTLEGTNQAKYFQTWIFAMVAITCIIIQLNYLNMALDTFNTAIVSPIYYALFTSFTILASAIMFKDYSGQSASSIASELCGFITVLSGTAVLHSTRDPETPLITDLYTPLSPKVSWYIQGNGELWKQKDEDESSPSFITILRQDYFK
Gohir.A11G061900	ghMGT16	MGDWVIGAFINLFGSIAINFGTNLLKLGHNERERHSMMDGEGMAGKVPLKPIIYFQTWRVGILFFIIGNCLNFISFGYAAQSLLAALGSVQFISNIAFAYFVLNKMVTVKVLAATAFIVLGNFFLVAFGNHQSPVYTPEQLAEKYSNITFLLYCLILILVVALHHYIYRRGEIVLSVSGQDLRPYWNMLLPFSYAVVSGAVGSCSVLSAKSLSNLLRLAMSNGYQLHSWFTYSMILLFLSTAGFWMARLNEGLSLFDAILIVPMFQIAWTFFSICTGFIYFQEYQVFDALRTTMFILGMVSVFAGISLLAPDEPRGGEVKDASHPTSVLSSSNSTETDRFIFESEDAENKEMKSFTQRMVVKVTDILAKAKTTCSLSLGFGDDSINASAVLVMPMMSSK…
Gohir.A12G038900	ghMGT17	MGFSDNSKGLILAMASSAFIGSSFILKKKGLKRAGASGTRAGVGGYTYLLEPLWWAGMITMIVGEVANFVAYVYAPAVLVTPLGALSIIVSACLAHFMLKERIQKMGILGCITCIAGSVVIVIHAPQEHTPSSVQEIWTLATQPAFLIYVAATLSIVLALILHFEPRYGQTNILVYLGICSLMGSLTVVSIKAIGIAIKLTLDGINQMAYPQTWFFLTVAAICVITQLNYLNKALDTFNAAIVSPVYYVMFTTLTIIASVIMFKDWSGQNVSSIASEICGFITVLSGTIILHATREQEPPPPVGTVTWYVSGDSMKSPEDEHLITLRSSEYYKP
Gohir.A12G161100	ghMGT18	MEESQGDFLPSDVPESTSSNNCERNTSSAHSNRWSGFPGVKKRGHSSRSWIKIDQDGNVKILELDKAKIMRQCSLPSRDLRLLDPLFIYPSTILGREKAIVVSLEQIRCIITAEEVILMNSLDINVVQYKSELCKRLQAKKDQSDDLPFEFRALELALELTCMSLDVKVKELEMEIYPVLDELASSINTLNLERVRRLKGHLLTLTQRVQKVRDELEHLMDDDGDMAEMYLTEKKLRSEGNTPHEINPLTNFSGGTRQVSKSAPVSPIASTSGAPRLQRAFSSIVTASKQGSLSSSHGGDNIEQLEMLLEAYFVVIDHTLSKLLSLKEYIDDTEDLINIKLGNVQNHLIQFELLLTAATFVATLFAAVAGVFGMNFAASIFDYPSAFSWVLIITGAGCG…
Gohir.A13G047400	ghMGT19	MTATGTPPPPPSSKPEDDPNLSNRSAVIPNQTLPFTTHRKKGTSIRSWLLLDSTAHTFRLEAGKHSIMRRTGLPGRDLRILDPLLSYPSTVLGIITAQEVLLLNSKDPSVTPFVDELQRRILLHYQANQSKEGAIDDTNCIIRTTSQNLLPKISQLQSLSEEGRGEEKQGLETQEGTRTLPFEFVALEACLEAACGCLESETRTLEQEAHPALDRLTSKISTLNLERVRQIKSRLVALTGRVQKVRDELENLLDDDDDMAEMYLTEKQIVENSSTSSMNQRDDLDDDDDDEAEALLTTSYEGDVKDPDKPHDHSFGATIGRDTHGIHASSCHSLIGKPVNVEELEMLLEAYFVQVDGTLNKLSTLREYVDDTEDYINIMLDDKQNHLLQMGVMLSTANL…
Gohir.A13G223600	ghMGT20	MALTPPPSPNLLQVSVKSSSSPCLSPSVHYLLFGSPCANASPFLLQKSGLPLLPVAVKPSSLERRIKCFTTRSYTKEDRLNEPETFSAEDVAGGGDEDGGSEDLDLQQNRGSAVASPRIASSSSDSLSLGIREPVYEVLEVKSNGVVSTRKINRRQLLKSSGLRPRDIRSVDPSLFLTNSAPSILVREHAILLNLGSLRAIAMRECVLIFEYNRKGGQAFMDTLLPRLNNMNGGPCMPFELEVVEAALLSRTQRLEQRLMDLEPRVQALLEELPKKLTVDILEQLRISKQTLVELCSRAGALRQMLLDLLEDPHEIRRICIMGRNCTLKRGTDDVECSLPLEKLIAEEEEEEIEMLLENYLQRCESCHGQAERLLDSAKEMEDSISVNLSSRRLEVSKV…
Gohir.D01G008900	ghMGT21	MVEAGKHAIMRRTGLPARDLRILDPLLSYPSTILGRERAIVINLEHIKAIITAQEVLLLNSKDPSVTPFVDEIQSRILCHYQATKDQEGGVDDSSYIIRSSSQNLSSRFSQSQTQDDEGKLEEKQSLENPNGSKILPFEFVALEACLEAACSCLENEAKTLEQEAHPALDKLTSKISTLNLERVRQIKSRLVAITGRVQKVRDELEHLLDDDEDMAEMYLTEKQLLENSSTSSMNERDDMDDHSSTRHQ
Gohir.D01G022300	ghMGT22	MTHVVPADPQVLVTVKKKAQPSRSWAVLDSNGETTLLDVDKYAIMHRVNIHARDLRILDPLLSYPSTILGRDGAIVLNLEQHIKAIITAEEVLLRDPSGEYVVPVVQELQRHLPVVNAINQGPEAIGQIDVEAADECVSPFEFRALEVALESICSFLAARTLELETAAYPALDELTSLISSRNLDRVRKLKSAMTRLTARVQKVRDALEQLLDDDDDMADLYLSRKLAASSPVSGSGAANWYAVSPTIGSKISKASRGSIATIHGDENDVEELEMLLEAYFMQIDGTLNKLTTLREYIDDTEDYINIQLDNHRNQLIQLELFLSSGSVCLSVYSLVAAIFGMNIPFTWNDNHGYVFKWVVIISGLLSALLFILIMSYARLKGLVGS
Gohir.D01G173400	ghMGT23	MAVVQKWREGMSSDNVKGLVLALSSSLFIGASFIVKKKGLKKAGASGIRAGVGGYSYLLEPLWWAGMITMVVGEIANFAAYAFAPAILVTPLGALSIIISAVLAHIILRERLHTFGILGCILCVVGSTTIVLHAPQERQIESVTEVWDLATEPGFLFYTALVLTAVFILIYQFVPQYGQTHIMVYIGVCSLVGSISVMSVKALGIALKLTFSGTNQLVYPQTWAFTLVVITCVLTQMNYLNKALDTFNTAVVSPIYYVMFTSLTILASVIMFKDWDGQSPTQILTEMCGFVTILSGTFLLHKTKDMADGPGLSTSLSMRSLKHEEDDGFSEGIPLKRQDT
Gohir.D02G023100	ghMGT24	MNGMSMDNFRGLILAVSSSVFIGSSFIIKKQGLKKAGASGPRAGQGGHSYLYEPWWWAGMITMIIGEIANFAAYAYAPAILVTPLGALSIIFSAVLAHFILKERLHIFGMLGCALCVVGSTTIVLHAPKERHIESVKQVWHLATEPGFLVYFWVALAVVAVIIFHYVPRYGQTHLVVYIGICSLMGSLTVMGVKAVGIALKLSFGGVNQFKYFETWIFTIIVIFCCLLQINYLNKALDTFNTAVVCPVYYVMFTTFTIIASIIMFKDWNSQGGTEITTELCGFITILSGTFLLHKTKDMGKSSSGRLPVYTSPESNTVAESR
Gohir.D02G224700	ghMGT25	MGLSDNLKGVILAVASSAFIGSSFILKKKGLKRGGASGIRAGVGGYTYLLEPLWWAGMITMIMGEIANFVAYIYAPAVLVTPLGALSIIVSACLAHFLLNERIQKMGIVGCVSCIVAFLVYVVATLSAVLALVLHFEPHYGQTNILVYLGICSLMGSLTVVSIKAIGIAIKLTLDGMSQIAYPQTWFFLTVAVICVITQLIYLNKALDTFNATLVSPVYYVMFTTLTIIASVIMFKDWSGQNAGSIASEICGFITVLSGTIILHVTREQEPPPPPVGTVTWFINGDSLKSPEEEHLITHHRLDEYYEPRESKTIILP
Gohir.D02G236300	ghMGT26	MAAVRRWSEGMSSDNIKGLVLAISSSLFIGASFIVKKKGLKKAGASGVRAGVGGYSYLLEPLWWFGMITMVVGEIANFAAYAFAPAILVTPLGALSIIISAVLAHIILREKLHTFGILGCALCVVGSTTIVLHAPQERQIESVTEVWDLATEPGFLFYTALVLTAVFTLIFHFVPQYGQTHIMVYIGVCSLVGSISVMSVKALGIALKLTFSGMNQLLYPQTWAFTLVVASCVITQMNYLNKALDTFNTAVVSPIYYVMFTSLTILASVIMFKDWDRQTPTQIITEMCGFITILSGTFLLHKTKDMVDGPSLTTSISMRSLKHEEEDGFDEGVPLKRQDTSRIP
Gohir.D04G163500	ghMGT27	MGKGPFSFRRPSIRRRRPKSTAVPQSPKPIPTAGAVASSSSPPPPSTGNLIGGGGGGGGVVAAGKGKKKAAGARLWMRFDAMGVSELVEYDKSTIIKRASIPARDLRILGPVFSHSSTILAREKALVVNLEFIKAIVTAEEVLILDPLQQEVLQFVDQLRLQLPHKSAYKTQGAGAADVNDSETHVSTGGRWLPVPEAMEGLQCELPFEFQVLEIALEVVCSFLDKSVAELETDAYPVLDELARNVSTKNLEHVRSLKSNLTRLLARVQKVRDEIEHLLDDNEDMSNLYLTRKWIQNQQLEALSGGAASNSITTISPRLPRLSSNRSASLVSSHNLDDDDVEDLEMLLEAYFMQLDGTRNKILSVREYIDDTEDYVNIQLDNQRNELIQLQLTLTIASF…
Gohir.D04G175500	ghMGT28	MAAVRRWSEGMASDNVKGLVLALSSSLFIGASFIVKKKGLKKAGASGIRAGSGGYSYLLEPLWWVGMITMVVGEIANFAAYAFAPAILVTPLGALSIIISAALAHIILREKLHTFGILGCVLCVVGSTAIVLHAPPERQIESVTEVWDLATEPGFLFYALLVLTAVFILIFHFVPQYGQSHIMVYIGVCSLVGSISVMSVKAVGIALKLTFSGMNQLVYPQTWAFTLVVVTCVVTQMNYLNKALDTFNTAVVSPIYYVMFTTLTILASVIMFKDWDRQNPTQIITEMCAFVTILSGTFLLHKTKDMADGTSLTSMSMRQLKHEEEDGFDESIPLKRQDSLRIP
Gohir.D06G119200	ghMGT29	MADLKERLLPPKPQSAINIRDASYRPSASGRQPFQGMDLSGLKKRGQGLRSWIRVDTSGNSQIIEVDKFTMMRRCDLPARDLRLLDPLFVYPSTILGREKAIVVNLEQIRCIITADEVLLLNSLDSYVLQYVVELQRRLTSGVGEVWQSEGPELNRRRSSRGFDNVYGSTSPDYLPFEFRALEVALEAACTFLDSQAAELEIEAYPLLDELTSKISTLNLERVRRLKSRLVALTRRVQKVRDEIEQLMDDDGDMAEMYLTEKKSRMESSFYGDQSLMGFRSNDGLSASAPVSPVASPPELRRLEKSLSIARSRHESMRSSESATENIEELEMLLEAYFVLIDSTLNKLTSLKEYIDDTEDFINIQLDNVRNQLIQFELLLTTATFVVAIFGVVAGIFGM…
Gohir.D07G021900	ghMGT30	MWESICLTLAATAGNNIGKVLQKKGTGILPPLSFKFKVIRAYAVNKSWLVGFLIDISGALLMLRALSLAPVSVIQPVSGCGLAILSIFSHFYLQEVMNVIDWLGITLAGIGTIGVGAGGEEQVASSVSILQLPWLAFFVVILFVLLNGWLRICKRQRREQELMEYEVVEEIIYGLESGILFGMASVISKIGFVFVQQGFSKMLILLRKRR
Gohir.D07G125800	ghMGT31	MGMSQDNLRGFILALLSSGFIGASFIIKKKGLRRAAAVSGVRAGYGGYAYLLEPLWWLGMVTMIVGEVANFVAYAFAPAILVTPLGALSIIVSAVLAHFMLKEKLHQLGVLGCVMCISGSVIIVIHAPQESPITSVQEIWAMATQPAFLLYLGSVIVLVVLLILYFAPRCGHTNVLVFTGICSLMGSLSVMSVKALGTALKLTFEGKNQLVYLETWFFMFIVATCVIIQMNYLNKALDTFNTAVVSPIYYVMFTSLTIIASVIMFKDWDGQNTGSIISELCGFIAVLCGTILLNSAKDSDRGSSFRGEHAPLSPTLSTGLFSGNRETLKHDEENELSPDDICLRKQEPY
Gohir.D07G215700	ghMGT32	MTRQVYFVPAAETQVASVKKKTAVTTSWVSVDAKGQGTVLDVDKYAIMRRVQIHARDLRVLDPMLSYPSTVLGREKVIVLNLEHIKAIITAEEVLLRDPFDDNVIPIVAELKRRLPQEKNLTCQGLGEEEEEHIGLRNDVNTGEENEFPFEFRALEVALEAICSFLDARTRELETDTYPALDELTSKISSRNLDHVRKLKSAMTRLTNRVQKVRDELEQLLDDDDDMADLYLSRKLAGACSPVSVSGARNWYPSSPTIGSKISRTSRASAVTAEEDNDVEELEMLLEAYFMQIDNTLNKLTTLREYIDDTEDYINIQLDNHRNQLIQLELFLSSGTVCLSIYSLVAAIFGMNIPYTWKEGHGYMFKWVVILTGLLCTSTFTSIISYARHKGLIGS
Gohir.D08G070700	ghMGT33	MAREAYLVPVLEAQVATLKKKTAVTTSWISIDAKGKSVILDVDKYAIMRRVQVHARDLRILDPMLSYPSTILGREKVIVLNLEHIKAIITAEEVLLRDPYDDNVIPIVAELKRRLPQDNLTCQDQGEEEEEHPSARNDMDTEEENEFPFEFRALEVALEAICSFLDARTRELEIDAYPALDELTSKISSRNLDRVRKLKSAMTRLTNRVQKVRDELEQLLDDDDDMADLYLSRKLAGACSPVGSFSVPSWYPPSPTIGSKISRTSRASAVTVEEDNDVEELEMLLEAYFMQIDSTLNKLTTLREYIDDTEDYINIQLDNHRNQLIQLELFVSSGTVCLSIYSLVAAIFGMNIPYTWKEGHEYMFKWVVILTGLLCTSTFTSIVSYARHKGLIGS
Gohir.D09G090700	ghMGT34	MADLKERLLPLKPQSAINLRGTTSQASASGRQPFQGLDLSGLKKRGQGLRSWIRVDTSGTSQVIEVDKFTMMRRCDLPARDLRLLDPLFVYPSTILGREKAIVVNLEQIRCIITADEVLLLNSLDSYVLQYVVELQRRLTSGVGEVWQPEGPELNRRSCRNFDNVYGSPSPDYLPFEFRALEVALESACTFLDSQAAELEVEAYPLLDELTSKISTLNLERVRRLKSRLVALTRRVQKVRDEIEQLMDDDGDMAEMYLSEKKSRMECDQSMMGFRSNDGLSVSAPVSPVSSPPESRRLEKSLSMARSRHESTKSSESATESIEELEMLLEAYFVLIDSTLNKLTSLKEYIDDTEDFINIQLDNVRNQLIQFELLLTTATFVVAIFGVVTGIFGMNFAIP…
Gohir.D10G152400	ghMGT35	MVHVVPADPQAVVAVKKKAQSSRSWVLLDSTGETTVLDVDKYAIMHRVNIHARDLRILDPLLSYPSTILGRDGAIVLNLEHIKAIITSEEVLLRDPSDENVVPVVEELKRRLPPVNAIQQGQDYTGGQNDVEGDEDESPFEFRALEVALESICSFLAARTLELETAAYPALDELTSQISSRNLDRVRKLKSAMTRLTARVQKVRDELEQLLDDDDDMADLYLSRKLAGTSPVSGSGAANWYLASPTIGSKISRASRASIATARGDENDVEELEMLLEAYFMQIDGTLNKLTTLREYIDDTEDYINIQLDNHRNQLIQLELFLSSGTVCLSIYSLVAAIFGMNIPYTWDTNHGYMFKWVVIVSGIFCATLFILIMSYARLKGLVGS
Gohir.D11G063300	ghMGT36	MYSSNLKGFILAMVSSAFIGSSFIIKKKGLRKAGVNGPRASSGGYGYLLEPLWWVGMLTMIIGEISNFVAYIYAPAVLVTPLGALSIIVSAVLAHFMLKEKLQKMGMLGCLLCIVGSTIIVLHAPEERSISSVEEIWEFATQPAFLLYTASAIATALVLILYCAPRYGQTNIIVYIGICSVIGSLTVMSIKAIGIAIKLTLEGTNQAKYFQTWIFAMVAITCIIIQLNYLNMALDTFNTAIVSPIYYALFTSFTILASAIMFKDYSGQSASSIASELCGFITVLSGTAVLHSTRDPETPLITDLYTPLSPKVSWYIQGNGELWKQKDEDESSPSFITILRQDYFK
Gohir.D11G065800	ghMGT37	MGDWVIGAFINLFGSIAINFGTNLLKLGHNERERHSMMDGEGMAGKVPLKPIIYFQTWRVGILFFIIGNCLNFISFGYAAQSLLAALGSVQFISNIAFAYFVLNKMVTVKVLAATAFIVLGNFFLVAFGNHQSPVYTPEQLAEKYSNLTFLLYCLILILVVALHHYIYRRGEIVLAVSGQDLRPYWNMLLPFSYAVVSGAVGSCSVLFAKSLSNLLRLAMSNGYQLHSWFTYSMILLFLSTAGFWMARLNEGLSLFDAILIVPMFQIAWTFFSIFTGFIYFQEYQVFDALRTTMFILGMVSVFAGISLLAPDEPRGGEVKDGSHPTSVLSSSNSTETDRFIFESEDAENKEMKSFTQLMVVKVTDILAKAKTTCSLSLGFGDDSINASAVLVMPMMSSK…
Gohir.D12G033500	ghMGT38	MGLSDNSKGLILAMASSAFIGSSFILKKKGLKRAGASGTRAGVGGYTYLLEPLWWAGMITMIVGEVANFVAYVYAPAVLVTPLGALSIIVSACLAHFMLKERIQKMGIVGCITCIAGSVVIVIHAPQEHTPSSVQEIWTLATQPAFLIYVAATLSIVLALILHFEPRYGQTNILVYLGICSLMGSLTVVSIKAIGIAIKLTLDGINQMAYPQTWFFLTVAAICVITQLNYLNKALDTFNAAIVSPVYYVMFTTLTIIASVIMFKDWSGQNVSSIASEICGFITVLSGTIILHATREQEPPPPVGTVTWYVSGDSMKSPEDEHLITLRSSEYYEP
Gohir.D12G164400	ghMGT39	MEESQGDFLPSDVPESTSSNNCERNTSSAHSNRRSGFPGVKKRGHSSRSWIKIDQDGNVKILELDKAKIMRQCSLPSRDLRLLDPLFIYPSTILGREKAIVVSLEQIRCIITAEEVILMNSLDINVVQYKSELCKRLQAKKDQSDDLPFEFRALELALELTCMSLDVKVKELEMEIYPVLDELASSINTLNLERVRRLKGHLLTLTQRVQKVRDELEHLMDDDGDMAEMYLTEKKLRSEGNTPHEINPLTNFSGGTRQVSKSAPVSPIASTSGAPRLQRAFSSIVTASKQGSLTSSHGGDNIEQLEMLLEAYFVVIDHTLSKLLSLKEYIDDTEDLINIKLGNVQNHLIQFELLLTAATFVATLFAAVAGVFGMNFAASIFDYPSAFSWVLIITGAGCG…
Gohir.D13G045700	ghMGT40	MTATGTPPPPPSSKPEDDPDLSNRSAVIPNQTLPFTTHRKKGTSIRSWLLLDSTAHTFRLEAGKHSIMRRTGLPGRDLRILDPLLSYPSTVLGRERAIVINLEHIKAIITAQEVLLLNSKDPSVTPFVDELQRRILLHYQANQSKEGTIDDTNCIIRITSQNLLPKNSQLQSLSEEGRGEEKQGLETQEGTKTLPFEFVALEACLEAACGCLESETRTLEQEAHPALDRLTSKISTLNLERVRQIKSRLVAITGRVQKVRDELENLLDDDDDMAEMYLTEKQLVENSSTTPGEESLTTSYEGDVQDPDKPHDHSFGATIGGDTHGIHASSCHSLIGKPVNVEELEMLLEAYFVQVDGTLNKLSTLREYVDDTEDYINIMLDDKQNHLLQMGVMLSTANL…
Gohir.D13G228400	ghMGT41	MALTPPPSPNLLQVSVKSSSSPCLSPSVHYLLFGSPCSNASPFLLQKSGLPLLPVAVKPSSLERKIKCFITRSYTKEDRLNEPETFSAEDVAGGDDEDGGSEDLDLQQNRGSVVASPRIASSSSDSLSLGIREPVYEVLEVKSNGVVSTSKINRRQLLKSSGLRPRDIRSVDPSLFLTNSAPSILVREHAILLNLGSLRAIAMRDCVLIFEYNRKGGQAFMDTLLPRLNNINGGPCMPFELEVVEAALLSRTQRLEQRLMDLEPRVQALLEELPKKLTVDILEQLRISKQTLVELCSRAGALRQMLLDLLEDPHEIRRICIMGRNCSLKRGTDDVECSLPLEKLIAEEEEEEIEMLLENYLQRCESCHGQAERLLDSAKEMEDSISVNLSSRRLEVSKV…
Tc01v2_t013790	tcMGT01	MNTPGNDYYASESNERKKHHHPKNHPSRNNGIGGDLWTDGLICAFEYVHGQPKAVQQSSGAKIWSKQYASKDASRKQIYAYEPANSLTESVTSNNLAKSAPLTESALTAKDNEKNCSRNLNPGEEVPRTYWKPIGWDRVSELVQMLQVDDG-VSQPIDLTENEDDVTVADLAAPYWERPVGPTWWCHVAADHPSVNAWLSNAHWLHPAISNALLDESRLISERMKHLLYEVPVIVAGGLLFELLGQSAGDPLADEDDIPVVLRSWHAQNFLITSLHVKGSASNINVLGIAEVQEMLIAGSTNIPRTIHEVIAHLTCRLARWDDRLFRKSVFGEADEVELKFMDRRNHEDLHLFTIIMNQEIRRLSTQVIRVKWSLHAREEIVFELLQYLRGNATRALLE…
Tc01v2_t019400	tcMGT02	MYACRYVCIDVLQQSQGFYSGGGLERLHWLQLYHQEKGSSKGRGQRPPCRFWRIWLLVGATLVGWHDYYFNMTVIVGEIANFVAYIYAPAVLVTPLGALSIIVSAILAHFILKEKLQKMGMLGCLLCIVGSTVIVLHAPEERSINSVEEIWELATQPAFLLYTASAVAIALVLILYCAPRYGQTNIMVYIGICSVIGSLTVMSIKAIGIAIKLTLEGTNQAKYFQTWIFAMVAITCIITQLNYLNMALDTFNTAIVSPIYYALFTSFTILASAIMFKDYSGQSASSIASELCGFVTVLSGTAVLHSTRDPDTPLITDGGWKK
Tc01v2_t022150	tcMGT03	MAREVYLVPVETQVASLKKKTAVTTSWISIDAKGQGVILDVDKYAVMRRVQIHARDLRILDPMLSYPSTILGREKHIKAIITAEEVLLRDPFDDNVIPIVAELKRRLPQDNLTCQGQGEEEEHLGLRNDMDIGEENEFPFEFRALEVALEAICSFLDARTRELETDTYPALDELTSKISSRNLDRVRKLKSAMTRLTNRVQKVRDELEQLLDDDDDMADLYLSRKLAGASSPVSGSGAPNWYLASPTIGSKISRTSRASAVTVQEDNDVEELEMLLEAYFMQIESTLNKLTTLREYIDDTEDYINIQLDNHRNQLIQLELLLSSGTVCLSIYSLVAAIFGMNIPYTWKEGHGYMFKWVVMFAGILCASTFTSIISYARHKGLVGAA
Tc02v2_t001960	tcMGT04	MAAARSWSEGMSSDNVKGLVLALSSSFFIGGSFIVKKKGLKKAGASGIRAGVGGYSYLLEPLWWAGMITMVVGEIANFAAYAFAPAILVTPLGALSIIISAALAHIILREKLHTFGILGCVLCVVGSTTIVLHAPPERQIESVTEVWDLATEPGFLFYTALVLTAVFILIFHIVPQYGQTHIMVYIGVCSLVGSISVMSVKALGIALKLTFSGMNQLIYPQTWAFTLVVVTCVLTQMNYLNKALDTFNTAVVSPIYYVMFTSLTILASVIMFKDWDRQNPTQIITEMCGFVTILSGTFLLHKTKDMVDGPSLTASLSLRSLKHEEEDGFGEGIPLKRQDSLRMP
Tc02v2_t005250	tcMGT05	MGLSDNSKGVILAVASSAFIGSSFILKKKGLKRAGATGTRAGVGGYTYLLEPLWWAGMITMIIGEVANFVAYVYAPAVLVTPLGALSIIVSAFLAHFMLKERVQKMGIVGCVSCIVGSVVIVIHAPQEHTPSSVLEIWTLATQPAFLIYVAATLSTVLALVLHFEPHYGQTNLLVYLGICSLMGSLTVVSIKAIGIAIKLTLDGISQLAYPQTWFFITVAAICVITQLNYLNKALDTFNAAIVSPVYYVMFTTLTIIASVIMFKDWSGQNVSSIASEICGFITVLSGTIILHATREQEPPPPVDDF
Tc02v2_t007390	tcMGT06	MGKGPFSFRRSSTRRRRPKSTTVPQPPTPTPPPPPAGAASSSSPPPPSAGNLIGGGGGGGAVGAAGKGKKKAAGAKLWMRFDTMGISELVEYDKSTIIERASIPARDLRILGPVFSHSSTILAREKAMVVNLEFIKAIVTAEEVLILDPLQQEVLQFVDQLRQQLPHKSACKIQGAGAMDVNDSEMHVSTGRQWLPVPEAMEGLQCELPFEFQVLEIALEVVCSFLDKSVAELERDAYPILDELARNVSTKNLEHVRSLKSNLTRLLARVQKVRDEIEHLLDDNEDMSHLYLTRKWIQNQQSEALSGAAVSNSISTTTTHLPRLGSHRSASLVSSHNLDDDDVEDLEMLLEAYFMQLDGTRNKILSVREYIDDTEDYVNIQLDNQRNELIQLQLTLTIA…
Tc02v2_t009780	tcMGT07	MRSQPPPPPPKPEDDPDLLIRATPTSNQPLTTSVAGHRKKGTGVRAWLLLDSTGQTQVVEAGKHAIMKRTGLPARDLRILDPLLSYPSTILGRERAIVINLEHIKAIITAQEVLLLNSKDPSVTPFVDELQSRISCHYQATKAQECVVDDSNCIIRTSSKNWSARFSLPQNQDEEGTAEEKQGIENPDGSRILPFEFVALEACLEAACSCLDNEARTLEQEAHPALDKLTSKISTLNLERVRQIKSRLVAITGRVQKVRDELEHLLDDDEDMAEMYLTEKQQFENSSASSMDESDVINDEVLQPDFTDRTPVEISLASNYEGDLQDSDNPQLNAIGRDSHGTHTSTTHSAMSKHLDVEELEMLLEAYFVQIDGTLNKLSTLREYVDDTEDYINIMLDDK…
Tc02v2_t010340	tcMGT08	MDLGQEELAGDGEMEELVRASSADNPLRENHLQRTHFPGMVRQKAYIFDGLGNYYNKEWDLAEGGGKEFCWYHVELPKGNQKLSQSAQYLIDVLCPPLKLQDILSLVSNGPFCGHVDGALVFRVNSPGPPSSNFTFRLAARVTENSVITVSLGRVPRLGFSPVGQSLLSEIPSVESPSYHRGERKEGGGIVIREHVLEFLLTMNHSEEADNPVPKSVSNLVVHIIDTHVDHLQDVVTKLEMELDSVELELDRGGFALKKQMLDDRRFPKMHLNLQRLLQVIAHGEQVYPRVKEKCSSKNWFASEDISSLEELIGRLRRLKENVGFLANRVTAIQAGLDSWQSEQINRKLYYLSFLSIIFLPLSVITGVFGMNVGGVPWTVQKDPALNDGFRNVMIICVA…
Tc02v2_t028490	tcMGT09	MEESQGHFLPSDIPESTSSYNSERLNSGAHANCGSGFPGVKKRGHSSRSWIKIDQDGNVKILELDKARIMRHCSLPSRDLRLLDPLFIYPSTILGREKAIVVSLEQIRCIITAEEVFLMNSLEKNVVQYKSELCKRLQTNKDQADDLPFEFRALELALELTCMSLDAQVKELEIEIYPVLDELASSINTVNLERVRRLKGNLLALTQRVQKVRDELEHLMDDDGDMAEMYLTEKRLKSEGNTPSELNAITNFSGGTKVVSKSAPVSPVASTNGSHRLQRAFSSIVSSSKHGSLISSSNGGENIEQLEMLLEAYFVVIDHTLSKLFSLKEYIDDTEDLINIKLGNVQNHLIQFELLLTAATFVATLFAAVAGVFGMNFAASVFDYPSGFSWVLLITGAGC…
Tc04v2_t004370	tcMGT10	MGEWVIGAFINLFGSIAINFGTNLLKLGHNERERHSTMDGGGKTPLKPIIYFQTWRVGILFFVLGNCLNFISFGYAAQSLLAALGSVQFVSNIAFAFFVLNKMVTVKVLVATAFIVLGNIFLVAFGNHQSPVYTPEQLAEKYSNITFLLYCLILILVVALHHSIYRRGEHLLAVSGQDLRPYWNMLLPFSYAVVSGAVGSCSVLFAKSLSNLLRLAMSNGYQLHSWFTYSMLLLFLSTAGFWMTRLNEGLSLFDAILIVPMFQIAWTFFSICTGFIYFQEYQAVKLIVQVFDALRTTMFILGMMSVFIGISLLAPDESRGGEVKDIDSVMSSSNSTETDRLILPSEDVQNKEIKSFTQGMMMKITDMLAKAKMTCSLSLGFGEDSINASAVLVMPMMSS…
Tc04v2_t015960	tcMGT11	MGMSIDNVRGLVMAVSSSIFIGSSFIIKKKGLKKAGATGTRAGQGGHSYLYEPWWWAGMITMIVGEIANFAAYAYAPAVLVTPLGALSIIFSAVLAHFILEERLHIFGVLGCALCVVGSTTIVLHAPQERNIESVKEVWQLATEPGFLAYTLLILILVAVLIFRYVPRYGQTHLIVYVGICSLMGSLTVMGVKAVGIALKLSFSGMNQFKYYETWVFTFVVTFCCLLQVNYLNKALDTFNTAVISPVYYVMFTTFTIIASMIMFKEWDSQAAADIATELCGFVTILAGTFLLHKTKDMGKSPSVRSPVFTSPDLNPTPDSK
Tc04v2_t020050	tcMGT12	MAHVVPADPQAVVTVKKKAQPSRSWVLLDSTGETTVLEVDKYAIMHRVNIHARDLRILDPLLSYPSTILGRDGAIVLNLEHIKAIITSEEVLLRDPSDEYVVPVVQELQRRLPPVNAFHQGQEYTGGQNDVEAGDEDESPFEFRALEVALESICSFLAARTLELESAAYPALDELTSQISSRNLDRVRKLKSAMTRLTARVQKVRDELEQLLDDDDDMADLYLSRKLAGASPVSGSGAANWYPASPTIGSKISRASRASIATVRGDENDVEDLEMLLEAYFMQIDGTLNKLTTLREYIDDTEDYINIQLDNHRNQLIQLELFLSSGTVCLSICSLVAGIFGMNIPYTWNTDHGYMFKWVLIVTGILCSVLFILIMSYARFKGLVGS
Tc06v2_t003480	tcMGT13	MAESALPENNGDHAVPKIKLGGGFYYLHNRRLGQGPRNWIRVDALGNSQVIEVDKLTMKHHCDLPARDIRLLDPLLVYPSTILVREKAIVVNMEQIRCIITADEFLLLNSRDSSVLQHVEELQRRLKSGVGDDQIRQAGGPDDVLGRAYFELPFEFKVLEVALEVVCALLDSQVTEHELEVYPLLDALTSKVTTINLERVRILKSRAVALTRRVQKVRDAIEHLMDNDDDMAEMCLTVKKKTKTKTRMESSFSGDQSSMQFRSKGPSVSAPVSPVSSPPDSGERLKHSLTTVWGRRKSMRASESTPESLEDLEVLLESYFVLIDSSLNKLTTMKEYIDDTEDFINIQLDSQRNRLIQFELLVTTTTLALAIFGTVVGVFGMNFDLPFFDDPATFIRIVI…
Tc06v2_t003490	tcMGT14	MDVLEFPETGQGLRSWIRVDASANSQALEIDKLTIIRRCGISTRDLRILDPLFVYPPTILGREKAIVANLEKMRCIITADEVLLLNTLDRNVLQYVMELQKRLRSTGVAELNPGGSGSRSFRSTSSYSPFEFRALAVVLDVVSGSLDSEASELEMEAYPLLDELTSEVSTFNLERVRGLKSGLVALTRRIRKIRDEVENIMDDNENMAEMYLTEKKRKMESSSLISDDQSSLVGIFRSNEGASEASDPIICPPVSSPSGFRSLTKNWSSLRIRRKSMMMSSENTAKSVEELESLLEAHFVVIDSILNKLITLKQHIDDTENFLNIQMNHLRNRLIQFELLLTSATFVLAIFGIIIGIFGINFPVPLFNDSHTIKLVLIITSICGIILYCALVCFYKWRK…
Tc06v2_t003500	tcMGT15	MADLKERLLPPKPQSAVNLRDASYRASASGRQPFQGMDLLGLKKRGQGLRSWIRVDTSGNSQIIEVDKFTMMRRCDLPARDLRLLDPLFVYPSTILGREKAIVVNLEQIRCIITADEVLLLNSLDSYVLQYVVELQRRLTSGVGEVWQSEGPELNRRRSSRSFDNSFGSTSPDYLPFEFRALEVALEAACTFLDSQAAELEIEAYPLLDELTSKISTLNLERVRRLKSRLVALTRRVQKVRDEIEQLMDDDGDMAEMYLTEKKSRMESSFYGDQSLMGFRSIDGLSISAPVSPVSSPPETRRLEKSLSIARSRHESMRSSESTTESIEELEMLLEAYFVVIDSTLNKLTSLKEYIDDTEDFINIQLDNVRNQLIQFELLLTTATFVVAIFGVVAGIFGM…
Tc06v2_t012890	tcMGT16	MSEKEDHSVSQKNKMKMPERHKHIPSRDVVPGSDLWTDGLICAFEFIRGHKKPMNSKYSSRVQSKRLDDESLKVQMPANGLTEGSSPRLDGQKLMKSSSSYELRDNVAASFDEYRDGPNLQSGQFHAMERFDGSCWVPIGWERISELVKNVQVNAGWASQQFELMDNEDDLTVAELAAPYWERPAGPIWWCHLAAGHPHVVAWLNNAQWLHPAVSLALRDESRLISERMKHLLYEVPVRVAGGLLFELLGQSAGDPFVEEDDIPIVLRSWQAQNFLLTVLHIKGTVSSVNVLGITEVQELLAAGGHNVPRTVHEVIAYLACRLTRWDDRLFRKSIFGAADEIELKFMNSFLANRRNQEDLNLFGVILNQEIRRLSRQVIRVKWSLHAREEIVFELLQHL…
Tc09v2_t020330	tcMGT17	MGLSQDNLKGVVLALLSSGFIGASFIIKKKGLRRAAAVSGVRAGCGGYAYLLEPLWWLGMITMIVGEVANFVAYAFAPAILVTPLGALSIIVSAVLAQFMLKEKLQPLGVLGCVMCISGSVVIVIHAPQESPITSVQEIWTMATQPAFLLYLGSVIVLVFLLIFHFVPRCGHTNVLVFTGICSLMGSLSVMSVKALGTALKLTFEGKNQLLYPETWFFLFIVATCVITQMNYLNKALDTFNTAVVSPIYYVMFTSLTILASVIMFKDWDGQSMGSIISELCGFIAVLSGTILLNSTKDSDRGSSFRGGHAPLSPTLSTGLFSGNGETPKQDEENVLLSEEICLRKQELH
Tc09v2_t024580	tcMGT18	MALTPSPSSSYPNLLQFSVKSPSPSVHYLLFGSPWSNASPFLLQKSGVPLLPVVVKPSCKKIKCFARSSTEEDCLSEPETLTAENVGEDDDGLGREDPNLQESQSSVVATQRITSSSSDSLLLGIREPVYEVVEVKSNGVVSTRKISRRQLLKSSGLRPRDIRSVDPSLFLTNSAPSLLVREHAILLNLGSLRAIAMKDCVLIFDYNRKGGKAFVDTLLPRLNNMNGGHCMPFELEVVEAALLSRTQRLEQRLMDLEPRVQALLEVLPNKLTGDILEQLRISKQTLVELGSRAGALRQMLLDLLEDPHEIRLICIMGRNCTLKRGNDDVECSVPLEKLIAEEEEEEIEMLLENYLQRCESCYGQAERLLDSAKEMEDSIAVNLSSRRLEVSRVELLLQV…

## Sheet: Genomics
gene ID	Gene ID	Genomic sequence
CCACVL1_04197	ccMGT01	ATGGGAGAGTGGGTCATTGGAGCATTCATCAACCTCTTTGGCAGTATTGCCATCAACTTTGGGACAAACCTTCTTAAATTAGGTCACAATGAGGTATGAAAGATTGCAACCTTTTGTCTCCTTTTACATTCTTATTGCCAATTCATATTAATCATTTACTTTGTTGTGTAAATTAAGCATTGTTTCAGATTTTTCACTAGTCAACCTGCTGCCTTTATCTTGTTGCTTGAACATTTAATAACACAGGCAAAAAATACATGAAAACCCATTTGCACAACTTGTGGTGTTAGTAGCAGGCCTGAGCATTCTTAAAATTTTTGCTTTCATGTTGTTAGGTCTGAATTCCATTAATCCAATGTGCATGCTAGTTATTTGCATTCAAAGTAAATGTGCTTTTGT…
CCACVL1_06282	ccMGT02	ATGAAGGTGCAAACACCAGCCAATGGACAAACAGAGGCTTCTTCTACGAGATTGGATGGGCAAAAAGTGAATGAGCCCTCTTCCAGTTATGAGTCAAGGGAGAGGGAAAATGTTGCCGTTTCTTTTGAGGAATACAGAGATGGCCAGAGCCTTCAATTGGGACAGTTTCCAGCTATGGAAAGATATGATGGCAGTTGTTGGGTACCCATAGGGTGGGAACGAATTTCAGAACTTGTAAAAAATGTGCAAGTCAATGGAGGCTGGGCTTCGCAGCAGTTTGATTTGATGGATAATGAAGAGGATTTCACTGTTGCAGATTTAGCAGCTCCATACTGGGAGCGCCCAGCAGGACCCATATGGTGGTGCCATTTGGCTGCTGGTCACCCTACTGCTGTGTCT…
CCACVL1_06479	ccMGT03	ATGGAAGAATCACATGGCCATATTCTTCCTTTTGACGTTCCTGAATCTACGACATCTTCTTATAACAATGAAAGGCTTAATTCAAGTACACAATCAAGTCGTGTTTCTGGCTTTCCAGGTGTGAAGAAAAGGGGTCACAGCAGTCGTTCATGGATAAAGATTGATCTAGATGGGAATGTGAAGGTTTTGGAGCTTGATAAGGCTAAAATTATGAGACAGTGTTCTTTGCCATCCAGAGACCTAAGGCTTTTGGACCCTTTGTTTATCTATCCTTCAACAATACTAGGAAGAGAGAAGGCAATTGTGGTCAGTTTAGAGCAAATAAGATGTATAATCACAGCCGAGGAGGTTATCTTGATGAATTCTTTGGAAAGAAACGTTGTTCAATATGAGTCAGAA…
CCACVL1_06907	ccMGT04	ATGGGGATGTCATCAGACAATGTTCGTGGACTTGTTCTGGCTCTCTCTTCAAGCATTTTTATTGGATCTAGCTTTATTATCAAGAAGAAGGGTCTTAAGAAAGCAGGGGCAACTGGACTCAGAGCTGGTTTGTTATTTTCTTTTTTCTTTTTTCAACTTCAATTCATCTATTTCTGGTAGCTTTGTGGATGAAATTTTGTTCATCATTTTTTATGATTGAATTGTATAAATCTTTAATTTTGTTCAGGTCAAGGAGGGTATTCTTATTTATATGAACCTTTCTGGTGGGCTGGGATGATAACTAGTAAGTTCAACAACTGTAATTTGTGTTTTGTTATGTCTCCTCAATTAAATTTCAACTTGTGAAGAATCAGTAGAGGCTTTCTTATTGATCTAAGT…
CCACVL1_10058	ccMGT05	ATGGATGTTTTTGAGTTGCCGGAAACAGGCCAAGGCCTTCAATCATGGATTCGGATCGATTCTTCGGGGAATTCCCAAGTCATTGAGATTGACAAATTGAGCATAATTGCTCGATGTGGTATCTCAACTCGCGATCTTCGGATTCTTGATCCCCTCTTCGTTTATCCCACGACGATCCTTGGCAGAGAAAAGGCCATCGTTGCAAATTTGGAGAAAATTCGGTGTATAATAACAGCTGACGAAGTTTTGCTCTTAAATTCCCTCGACAGAAACGTTTTGCAATTTGTGATGGAGTTGCAGAAACGTTTGGTCGCCAATGGCGCAGCTGCTTTGAACCCAAGAGGCAGTAGCAATAGGAGTTTTAGGAGTACTTCTTCGTATAGTCCATTCGAGTTTAGG…
CCACVL1_10059	ccMGT06	ATGGATGATTTCGAGTTGCCGGAAACAGGCCAAGGCCTTCAATCATGGATTCAAATCGATTCATCGGGGAATTCCCAAGTCATTGAGATTGACAAATTGAGCATAATTGCCCGATGTGGTATCTCAACTCGCGATCTTCGGATCCTTGATCCCCTCTTTGTTTATCCCACCACGATCCTTGGCAGAGAAAATGCCATCGTTGCAAATTTGGAGAAAATTCGGTGTATCATAACAGCTGACGAAGTTTTGCTCTTGAGTTCCCTCGACGAAAAAGTTGTGCAGTTTGTGGTGGAGCTGCAGAGACGTTTGGTCGTCAATGGCGCAGCTGCTTTGGACCCAAGAGGCAGTAGTAGGAGTCCCTTCGAGTTTAGGGCTCTTGCAGTTGCTTTGGAAGTTGTT…
CCACVL1_10060	ccMGT07	CATTTGGTTACTTTTGAGCAAGTTGGTAACTCATCTTTTGTTCCAAAGGCAGCAGAATTAGAAATTGAAGCATATCCTCTACTGGATGAGCTTACATCAAAGATCAGTACATTAAACCTGGAGCGTGTTCGCAGATTAAAGAGCAGACTTGTTGCATTGACTCGCAGAGTTCAAAAGGTATACAGTATATCATCACTTTTTCTGTTCCCTATCTGTCCCCTCCATTTGGCAGGTAAATGATACCCTTACTTCTGATGCTTTCCAACAATTTGGGTATCCATTTAGGTTAGAGATGAGATAGAGCAGCTAATGGATGATGATGGAGATATGGCAGAAATGTATCTTACTGAGAAGAAGAGAAGGATGGAGTCATCATTTTACGGTGATCAATCTCTGTTG…
CCACVL1_14415	ccMGT08	ATGGCTCGGGAAATTTATTTGGTTCCAATCGAAGCTTCGCTGAAGAAGAAAACGGCGGTTACAACCAACTGGATCTCGATAGACGCCGATGGGCAAGGCGAGATTCTTGACGTCGATAAGTATGCTATAATGCGCCGCGTTCAAATCCATGCTAGAGATCTTCGTATTCTTGATCCCTTGTTATCTTATCCTTCCACTATTTTAGGCAGGGAAAAGGTCGTTGTTCTCAACTTAGAGGTGAATTTTGATTCCATCGTTTTCATTTTTGTATTGACTTGTAATGTTTTGAAGTTGAATCAATCTTTCCTTTTTCTTTTCCAATGATTTCATTGCAGCACATTAAAGCTATAATCACAGCAGATGAGGTTAGTGGATAGAATTGTAATGATTGTTGTAAAC…
CCACVL1_16275	ccMGT09	ATGGGGGTTGTGAGGAGCTGGAGCGAGGGCATGTCCTCGGACAATGTCAAGGGCTTGGTTTTAGCGCTTTCTTCCAGTCTCTTTATTGGGGCAAGTTTCATTGTTAAGAAAAAGGGATTGAAGAAAGCCGGTGCTTCTGGCATCCGGGCAGGTATTGCAATTTATCCAACTTTCATTTAGTCTGTTGCTTTTTCTGTTTTTCAGTTTTTGATGATTAGACTCTAGACTTCTGTTTCATTTCTGCTGAAGTAGAAACTATGAACTAGATTAAGATGATTGGCAGTGGCTTTTCCGATTACTGTAGTTTATGGTATTTTGTGAATGTAATAGTTCAGTGAAAATCTAGAAAATGAAATTAAGTGAACTGGACATGTTGGAAACCCATTTTCCCAGGGAATT…
CCACVL1_16701	ccMGT10	ATGGGAATGTCGGAAAATTCCAAGGGAGTGATATTAGCAGTGGCGTCAAGCGCGTTTATCGGCTCGAGTTTTATTCTTAAGAAGAAAGGCCTCAAGCGTGCTGGTGCTACTGGTGCTCGCGCAGGTATGTTCTTTTTCTTTCAATTATTTATTTTCTTCTGAATTCTTAATTTCTGATTTTAATTTTATTCGTAACTTTAGCTGCCTATTTTGACTCACCTCACCTATTGAAATTGTTTCTTTGCTTCTTCTGATTTGACTCATCCTTTTTTTTTCTTTTTTTTCCCCTCAATCTCCGCAAATTTGATCCGTTTTCATTTCATTGTAGTGATAGAATTTTGTTAATTGGATTTGCTCAATGTCTTTAATTTGGAGTTTATTGAGAACGCGAATCGCGAT…
CCACVL1_16896	ccMGT11	ATGGGAAAAGGCCCCTTCTCTTTACGCCGCTCTTTCAGTCGGCGGCGTCGTCCAAAGTCCACAACGGTCCCACAATTGCCAGCGCCGGGGCCCAATGGAGCCGCTTCTTCATCTTCACCTCCTCCTCCGAGCGCGGGCAATTTGATTGCCGGTGGTGGTGGCGGTGGCGGTGGAGCTGGGGCGGTTGTGGCGGGGAAGGGGAAGAAGAAGACGGCGGGAGCAAGGCTATGGATGAGATTCGATCGGATGGGGGTTTCGGAGTTGGTGGAGTATGATAAGAATGCGATTATTAAAAGAGCTTCGATTCCTGCTAGGGATTTGAGGATTCTTGGCCCTGTCTTTTCTCACTCTTCGACTATTCTTGGTATGTTGAATTGCAAATTTCCTTTTTCTTTTTAA…
CCACVL1_17107	ccMGT12	ATGAGAACTCAACCTCCACCGCCACCGTCTAGACTCGAAGACGATCCGGACCTAACACCTCGGCCCACTCCAATCCCCAATCAGCCTCTCCCCGTCGCTGCTCATCGGAAAAAAGGAACCGGTGTTCGAGCATGGCTGTTATTGGATTCCACGAGCCAGACCCAAGTGGTGGAGGCCGGAAAGCATGCTATCATGAGACGAACGGGTTTACCAGCTCGAGATCTTCGGATCCTCGACCCGCTTCTGTCGTACCCCTCCACGATTCTGGGTCGAGAAAGGGCAATCGTTATCAATTTAGAACACATCAAGGCAATTATCACTTCCCAGGAGGTTTTGCTCTTGAATTCTAAGGATCCCTCTGTAACGCCTTTCGTTGATGAGCTTCAGAGCCGGATTTTG…
CCACVL1_17163	ccMGT13	ATGGAATTAGCTCAGGAAGATCCAGCTGGAGAAGGAGAAATTGAGGAATTGGTTAGAGTATCCTCTGCTAATATTCCTCTTGTGGAGACTAATCAGCATAGAACACATTTTCCTGGTATGGTGAGACAGAAGGCATACATTTTTGACAGCCTCGGAAATTATTATAATAAGGAATGGGATCTTGCTGAAGGTAGTGGCAAGGAGTTTTGTTGGTACCATGTAGAACTTCCAAAGGGAAATCAGAAACTCTCTCAATCTGCACAATACCTTATAGATGTTCTTTGCCCGCCATTAAAGCTTCAAGACATTCTCTCGCTTGTTAGCAATGGACCATTTTGTGGACATGTTGATGGAGCCCTTGTATTTAGGGTTAATTCACCTGGCCCTCCCTCCAGTAAC…
CCACVL1_25517	ccMGT14	ATGGCGCTAACTCCCTCTCCTTCTTCTTCTTCTTATCCAAATCTTCTCAAACTTTCTGCTAAATCTCCATCTCCGCCCGTAAATTATCTTTTCTTAGGTTCTCCATGGCCAAATCCGATTCTACTTCAAAAGAACGGAGTTCCTCTACTTCCGGTCGTAGTGAAACCGTCTTATAAAAAGATCAAGTGCTTCGCTAGATCGTCAACGGAGGAGGATCGTTTGAGCGAGCCGGAGACTTTGGCTGCTGACAATGTCGATGACGATGTTGACGATGGAGGGAGGGAAGATCCGAAATTGCAGCAACGCCAGGCTTCTGCGGTTGCGACGCAGAGGAACACTTCCTCTTTCAGTGATTCTCTTTCGCTTGGGATTCGTGACCCTGTCTATGAGGTTTTTACT…
CCACVL1_29622	ccMGT15	ATGGGTTTGTCTGAAGACAATTTAAAAGGGGTTGTCCTGGCATTGTTGTCGAGTGGGTTTATTGGGGCAAGTTTTATCATTAAAAAGAAAGGTCTCAAAAGAGCTGCTGCTGTTTCTGGTGTTCGAGCTGGTCTCTTCTTCTTTCATTCTTTCTTGTTCTTTTTTCTTAATTTTTTTTTTTATCAATTTGGGTTCTTATGAGTGTCTTTGATTCTTTGCAGGTTATGGCGGATATGCATATCTTTTGGAGCCTTTATGGTGGCTGGGCATGATCACAAGTATGTTAAGATTCTTTTCTTTGTCTCTTGAAGTTATATTTTTGTTATGTTTAATGTCTGCTGGGTGTGATTTAATTTTCAATTTATCATTCTTTTTCAGCCCATTCTTATGAATGGTTAT…
CCACVL1_30870	ccMGT16	ATGAATAAAGTAGGCAATGATTATTCAAACTCAATGAGCAATGAAATGAAGAAACAAGATTATAACAAGAATCAGTATCAGAGCTGGAGCGATGCAATAGGAGGTGATCATCTTTGGACAGATGGACTTATTTGTGCTTTTGAATTCATTCAAGGTCAAGGACAAAGAAAAACACTTCAGCAAAAAGCTGGTGCAAAGGTCTGGTCTACACGGTATGGTTCAAAAGAAGCATCTAGGAAGAGGATTTATGCACATGAGCCGGAGGATTCTAGTGTTAACAATTTAGCTAACTCTCCACCCTTAACAGATTCTGCATTTACAGTTAAAGATACATTGTGTGAAAAAAATTGTAACCACAGGAATCATAATCCTGGAGAAGAGTTGCCAAGAACATATTGG…
Gohir.A01G024300	ghMGT01	AATATTAATTGAAAAAAATCCTAGACCCCAAAAATCAGCCTTTTCTGTATTCGATTTCGATTGATTTTTTTAAAAGTGGTAGGTTTGGGGTCGGGGGATGTGAAAAGGTGATGGTTAAAGATGACGCACGTGGTGCCGGCGGACCCACAGGTGTTGGTGACGGTGAAGAAGAAGGCACAGCCGTCGCGAAGTTGGGCCGTTTTGGACAGCAATGGCGAAACCACCTTGTTGGACGTCGATAAGTACGCTATCATGCATCGAGTTAACATCCACGCCCGTGATTTACGCATCCTCGATCCTCTCTTGTCTTACCCTTCTACCATTCTTGGCCGTGATGGTGCTATTGTTTTAAATTTAGAGGTTCCAACTTTATTATCTTTTTTTTTCCCTTAATTTTCT…
Gohir.A01G182300	ghMGT02	TAAATCAGAAAGGAAAACTTGGTGCTTAAACAAGTTAATCAAAACCAGAGTCGGAGAGGAGTCGTTATTCTAGTAAAATCCTCAACCTCAACGCCTACGCGATTCTCTTCCAATCGAGGAAGGCTCTGCCTGCACAACAATTATAGATATCTTCCATTTCTCGATCCTTCAATACTTATAGATCCGTTAACCCGTGTTCTTGTAACACAGGTTGGTTTAAATCGATTCCCTGATTGTGTAAAATTGAGATTTCTTTCGAGATCCATGAACCCATTTTTTAGACTCGGTCCGAGTTTCAGAGCAAATCGAGGATCCTGCCAAGTCTGGTTACATAGAATTGCCGCATTCCCTGAGAATTAGGGCTTTTTATTTTTATCTTTTTTTTTTATCAAGTCTAGG…
Gohir.A02G019800	ghMGT03	GAAACTAAAAAACCTATTTCTTAAACATTTTAGTAGTAACTTTCACATAGACAATGTCCATAAACCTCAAATTTAAAAAAAAAAATCCTAATTCTACTTTTGTTTGTCTCTTTTTTTTTTTCTAATCTTTCTTGTACGAAACTAAATGCAAGAAAGCTAAGGATTAGAATCCAAATACGAATTTCAAACCTGTAGGGCTGACTATCTAGATTCGGAGACTGTATTTGGTTCAGGAGATGTATAAACAGGAAGTCTGCCACTGGAACTTTTTCCCATATCTTTGGTTTTGTGAAGGAGGAATGTGCCTGCTAAAATTGTAATAAATCCACATAATTCTGTTGTAATCTCTGTCCCGCCTTGTGAATTCCAATCCTTTAAGAAAACAAAAAAGAAAAAATA…
Gohir.A03G203400	ghMGT04	CGAGACGGTGGTGAGTGATTAAATGTTCTTCCTCGGGACTCTTTAAGGAGTCGCCATTGATGAACCATGTCACGGTTCCTGCAATATAAATGAATGCTTTGATAAAAGCACAAATAGGTTTATATGGAAAGTTGAAGCAATTAATTGTTTGCAATTCAATAAAGTCAATCGAAGTTACAATAATTCCAATAGAATTGATCATTAGAAGTACTCAACTGAATAACTAACTCAACAACTAATTCAATTCTAGCTAACTAAACAGAATAAATTTGGAGAGAACCCGCCCAGGGCCTCAACCTTGCATTGCAAGGCTATAATAGCATATAAAGTTTCAACGTGTATGGTTATCATGCACATGCAAGGGAATGCAAAATTCAAATTGCTCATATAAGGAACTGA…
Gohir.A03G214800	ghMGT05	AGAAGGCTGTGATGCGATCCAAGAAGTTTTTTGTCTCTCACAGTCACAGCCAAAACAGCTGTTTTTCATTACTAATTGCCTCACTACTCATCCCATCCAACTCAGCAATAACTCGTCTTATCTCACTCCTTCTCCCCTTTCTCTCCTCCTCTATATTTTAAGCGCCGACAACCATTTCTCTCTTTCTTTCAGATTTTCTTCTTTCCTCAGCTCAGACTTGTCGTTCCTTTCCAAACTCACTCCGCGTCAACCGAGTCAAGATTCTTTTCCCAACTCACCATTGTAAATACTAATACGCTTCTTCCTCTATCTCTCTCTCTCTCTCTCTCTCTTTTTTTCTCGACTGATATTCCACCTTCGCTCTCTTTTTTTGAGGGCCGAGATCTGATATTTAAAACT…
Gohir.A04G121700	ghMGT06	AGGATGGAAACATTCATGTATATATTCATGCATATATATATAAAGAAAAATGTGACCTTCAGTTTTCATAGATTTAAAGCATGTATCAGAGAATTTGGTTAATTGGCCTTTGATTTCTGTACATACTTCAATTATATCCCATTGATGGGGCACAACTATGGTGAAAAGCACATTCATAGTTGATGATGAAGGATCAGTTTTAAGAACCAAGCAGCTTCTTCCATCTGGCATATCCTAGGATCAGAAGGAAAATCAGCACACACCCGACTGTAATACCTCCCACAAAGATTTCAAATATCCCCTCCTTGTTGTTCCATGTGAAAGGTATGTTCATGCCGAACCATCCGGCTACTAATGTCTCGACAGCTATGGCAAACGATGCGATGGTCAACGTCAATT…
Gohir.A04G130300	ghMGT07	TAACTTCACTAACTGATTCATTGTATATAAATGAAAGGACCATAGTGGATCTACCAAATCAAAATTGCAAAAGATATTGCATGTTTTTGATTCCTCTTTGTTTTTTTCTCTTTTTCACACTTCACATGTTGAGAGAACTATGGATATAGTTTATACAAGGCAAAAGATACATTGGGCTATATATTTTTCCTGTATGAACTATGGATAGTTTATACAAGGCAAAAGCTGAAGTCTATAGTCTGTATCTTGAAGCTAAAGGGAAAAAGAGCCATAGATAATCTCACCTCGGATAACTCCCTCCAAAATATGAGTGTGATCAAATAAGTTTGTTCGTAAAATACACGTTGACATCAATAAGGCTTCTCCCCATAAGCTCTACTGAGATTTGTAGGATGACCT…
Gohir.A06G114600	ghMGT08	CGACGACTCAGGAGCCGACAAAACTAATAAAAGCAACCAAGAAAAAAAGGGCTCTCCGCATCAGAAATCCTTTTTTAACATCAAAAATTTCAATCATAGATTCTTAATTAAGATTCTCGTCTTAGCTAATTGAGTAAAACTTACACCGCCTTTCGTAAATTTTTTAAACTATTTTATTTTATTTTCTTTTTTTTTTTAAACACGTACGTGAAAATTTCGTATTTGATCCAGGAGTTCTCTTCCTCACTAAATCCTCCTGTTCTCAATCATCCGCTGCTGCCAAGGTACTTTTCCAAATCTAGGGTTTCCTTTTCCCTATTTTCTTTATGTTGTTATAATTTAATTTATTAATCCAATTATTTTTGCAGTTTTTGATGTGTCGATATTAGCTTATTTAAT…
Gohir.A07G022000	ghMGT09	CCCACTGCCCTCACCCATAAATCCCTGTTTTTAGGTACAAAAAAGAGAGATTTTTTTAAGTTTTCAATAATAGAGGTAGATAGCAAAGAAGAAGAAAAATGTGGGAATCGATCTGTTTAACATTGGCCGCTACCGCTGGTAATAACATAGGCAAAGTTCTACAAAAGAAGGGCACCGGTATTCTCCCTCCTCTCTCCTTCAAGTTCAAGGTATCATTCACCCTTTTTTTTTTCTGGGTATCTTTCTTTTTGTATATTCTGCAATGATTCATACAGCCATTATACTTTTTTAAGCTACCGTAATATTGGGTTTGGTTTGAAACTTTTCAGTATGTGTGATTTTTGGGATATTGATCATAAAAAAAAATTATCAATCTCAGCTTCAGATCAGGCCTTCGCT…
Gohir.A07G121500	ghMGT10	AAAGTCGTTCCCATTGTCACAAGACAAAACAGGTAAGCAAAAGAGCAAGGCATGATTGAAGGATTTCAATGAATAGTAGTAGTAAACCAAGAAAAAAACAGAAGCATCCTGGAAATCTTTTGAACAAAAGATGGGTATGTCTCAAGACAATCTAAGAGGGTTTATTTTGGCATTGTTGTCCAGTGTGTTTATTGGAGCAAGTTTTATCATTAAAAAGAAAGGTCTTAGAAGAGCTGCTGCTGTTTCTGGTGTTAGAGCTGGTTTGTCCTCCCTTTTTCTTTTTTGGGGGTTCAATCCTTTTCGTCTTAATTTGGGTTTTTCGTGTATGCGTTTGATTCTTTGGAGTTTTGCAGGTTATGGTGGATATGCATATCTTTTGGAGCCTTTATGGTGGTTGGG…
Gohir.A07G209600	ghMGT11	TAACCCAATTAGTATCAACTATCACACAATATTTAAAATATACAACGTATATATACATTTATGTATATGCCAACATGATGATACTTGATAAAACTTTGTTCTGCCAAATGCAGTGACCAATTACAATAGGAGGAACAACCCCTCCCATGGACCATATTTTTCATAAAGCATGATAAATTGATAATACTAAATATTATAGCATATGCAATGTTTCACATGAAATTGCCAATGACCTGAAGCTTTACCAGGAATTCATTTCAGTTCTATGCATCTGCATAAAAAGATCAAGCTTTATCCCTATTACCTTGAACGCATTCTATGCACCTCATGACCCAATAAGACCCTTGTGCCTCGCGTAAGAAATTATTGATGTGAAAGTCGATGTGCATAGTAGTCCGG…
Gohir.A08G061600	ghMGT12	TTTGAGAATTGAAAATTTTATTGTAAAAACTAAGATTTAAAATTAAAACTCATTACATGTAAATTGTAAATGTAATTGCATGAAACAAATGAATTAAATTCAAATGTCAATTGTCACCTACTTTACCACCTACTTTCATGAATATATGCCAACATAAGGATGCACCTTATATAATTTTCTTCTGTTTTGCCAATTACAATATGACCTTCCATGCATGGATTCAAAAGCATGATATAATGATAACAGTGACAATATAGCACGCAGTTGTTCACCTGACATTGGCACCTGAAAGTTTAACCAGGTTGGGCCAAGATATGGTAAGGAATTCATTGCAGTACTACTTTTATGCTTCTCTTAAAGCTGTGTGATCCTCAGTACTCCAAATGTGATTTTATGGAC…
Gohir.A09G086400	ghMGT13	ATTTTTTTTTTGCTTAAAAAAGATAACGAAGGGAAAATTCAGTTAAAAAATTAAAAGTTAAAAACATCGATTCGTTGTTTCGAAGCAAAAATCAGATTCTATTCTCCTATGAGAAACCTTTACAATGGCGTCAACTCCCACTCCTCCTCCTTCCTCTTATCCAAATACACTCCAATTTTCTGTTAAATCTCCGTCTCCGTTCGTACATTATCTTCTCTTCCGCTCTCGATGGCGAAATGCTTCTACGATTTCGCTTCAAAAGAGCGGAGTTCCTCCACTTCCGCCTCTAGTGAGACCGTCTTTTAAGAAGTTCAAGTGCTTCGCTAGATCATCGTCAACGGAGGAAGATCGTTTGAGAGAATCGGAAACATTGGCCGGTGATGATGATGGTGATGATGA…
Gohir.A10G123900	ghMGT14	ATATTCTTTAACAAGAACAAATTCCCAGCGTCCCCAAAGCCAGGTTTTCATGTTCGATTTCGATCCAAACTCCAAAGCCATCCACCTTTCTTAAAAAACAGGGCAGCTCTCTTATTAAACATCAGAAAGAATAGAAGAAGACCTTTAAGTTCATGTGAAAATGGGGAAATTTTGAAGTGTTTGGAAAAGAAAAAAAAAACAGTTATCTTTGTTGCTAGATCTTTGAAAAGCGGGGGTCGTTGGGTGGGAGTAGTTGAGTGTGATGGTAAGAAATGGTGCACGTGGTGCCGGCGGACCCTCAGGCGGTAGTAGCGGTGAAGAAGAAGGCGCAGTCTTCTCGAAGTTGGGTCCTTCTTGATAGCACGGGGGAGACTACCGTGCTTGACGTCGACAAATATG…
Gohir.A11G059200	ghMGT15	ATGTAATGACGACCGGCAGGTGAGAAAGTACGTTCTCCTAAACGACCTTTCTGCCCAACCCGCAGCCAACACCATTAATTTCAAAATTAACCAAAAACAAAAGGGGAGAATTGAAGCGGTCTAGGGTTCTGACGAGACGAATCCAATTTCAATAAGCATATTATTGCTGTAATCTAACGAGACGAATCGAATTCCAATCAGCATATTATTACTGAATTCATAGTTGGGAAATCAATCTCTCCCTCTCTTTCTCCCTCTTTGTATATATATGTATGAATGCATGTGTATACATGTATTTATAGATGTACTCCAGCAATCTCAAGGGCTTTATTCTGGCGATGGTCTCTAGCGCCTTCATTGGCTCCAGCTTTATCATCAAGAAAAAGGGTCTCCGAAAGG…
Gohir.A11G061900	ghMGT16	AAAAAAAAACCTTATTTATTTTATTTAGAAAGATTGTCCTGAAAATCTGACATGTGAAAAATAATTTGTGGTACTAACAAAGGCAGAATAGTCCAGTCCAGCAGTATGTTTTTATGTTTCTTAATTTACATTACATACTCGTATTTCCTTTCAATAAGGTAAGCAAGACTATACAATGTAGAAACATATGACGGTGTAATGTTTCTATGAGCAAGAATATGCTACTCGGCACAATAACAAATCGATCCTAAGCTATTTGTGTTACTACAAATCAAGTATGTGAAGAACAAAGAATCAAAATCAATGTTTCTTACTATCCCTATATCAGGGGCTTTGAGGGAGCACCCCATCTCCATTTAACATCTTTGCACTCTCTTCATCCATTGCAACCCTACTCCA…
Gohir.A12G038900	ghMGT17	TTCCTGGAACCCAAAGGTTTGGACAGATAATCAAAAGCTTGATTTCAGTTCAACAAACTATATTAGTATGAAACATGGCAAAGATGTTTTGTATGCTTGAAACCTAGAAAAACACCAACTCCAAGACAGCGTTTTGAGTTATAACAATGAAAAAGAATTAACAAAACCCCAATCATTACAACACCTCAACCTCAACAAAATGCAAAAAGAACCGCTTTGTCTATCTACAAATGTAAGTGAAAATGAGATCACCACTGTCATATGGGAACCGATACCCAACTGCTCAACTCCTCCTTCCAAGTTCACAGTGATACAAAGAATTCCATATGCATTAATCCATTAACTGAATAGTTTGCAAGTCGTCAGGAAAAGGTATAGCACGAAAACTACCGTTCTGGC…
Gohir.A12G161100	ghMGT18	TTCGTCTTTTTTTTTTTTTTGAATGATTGAATTACTTTGTTTTTAGGGGAAGGCAGTAGATTATATGATTATCTGTTTATTTGCTGATTCATTACATTAAAATGTTACCAAATCAACTGTAAAAAGTCGAAAAGCGCAAGAAACGCTTCCCGGAATTTAATGGTGGCAGATCAGTTTCCATCCGCTGTTTCACTGACTCTCTTCGCTTCCATTTGGTGCAACAAAGCGATCCCTGATTCAATCCACCGCTTCTGCTGATTTTGGACCTTTGTTTTCAAGTGGTATAATAAAATTTTCTACCCTTTTCTTAATCGTTTTTTTTCCCTTGGGTTTATTGTTCCTGGAATTTGCTTGCTTTCACGCTTATTCTTCTAAGCAAAATTGGGTTGTTTATTTATT…
Gohir.A13G047400	ghMGT19	TGTCGATTTAATGTCAGTCGACTATAGAGATAGTAAAAATATAATAAGCTTATCGAGTCCAACATTCCAGAAAAGTTTATACAATAGATGTTTCAATTTCATGTTATTTTTTTCATACGGTTTCATGCGATATACAGTACGGTCTCGGAAGACTTACTCTAATAATCGCTTGTACTTACACCACGCGATAGCTATCACATAAAGGAATATCGAGCCGGCAGCACCACCTCCAATTGTCCACAGAAACTCTGGCATCCCTGCTTTATCTTCATCGAATAGCTCAATATGAATGTTCATGCCAAAGATACCTGCAACTACGATAAAAGCGCTGATGACAAGGGTTGCCGTTGTTAGCATGACTCCCATTTGAAGGAGATGGTTCTGTTTGTCATCAAGCAT…
Gohir.A13G223600	ghMGT20	TAAGTCAATACTGTATTGTCTTTTTCATTTCAAATATCAAAACCATTAAATCAACCGTAAGGTTTAGCAATGGCCATTTTCCTTCAAATCTGTTAACAAAAAGTTGGAAAAAAAATAGTAGTAGTAGTAGTAGTAGTTTAACATTACACACATATATTTGTTTTTGTTTAACAATTTCCTAGTTTAAGTTCTAAAAAGGCTAGAAAAACTAGTTTTTAACTTTTTAAGGTAATTCACAACTTACCTAAATTAAAGAATTCTCCTAGCTCTCAGATATGAATAAATGAGAAAAAACGCCACCACACCACCAACAATAATCCCCGCTGTGGTTACCCAAAAGGCGAACTGCAAAACGAATCGAGTAAGTTAGCGTAGCAAAAGTGAAAGTCATGTCGATAT…
Gohir.D01G008900	ghMGT21	AAAGACTAAACGGCACCATTTTCTTACCGCTAAATTTCAGTATCGAATGATCCTCCAAAAGAAAAACCCCAAAAATGAGGAGTCAACCTCCGTCGTCACCGCCTAAACCCGAAGATGACCCGGATCCATCGGCCCGACCCGCTTCGTTCCCTAACCAAACTCTCCCTCCCACCACCGCCACCACAGCCGCCGGTCATCGGAAAAAAGGGACCGGTGTTCGAGCATGGCTTATACTGGACTCGACATGCCAAACCCAGATGGTGGAAGCCGGAAAACATGCTATCATGAGACGTACGGGTTTGCCTGCTCGAGATCTTCGGATCTTGGACCCGCTGTTGTCGTACCCATCGACGATTCTTGGTCGAGAAAGGGCGATCGTGATTAATTTGGAGCATATCA…
Gohir.D01G022300	ghMGT22	AATATTAATTGAAAAAAATCCTAGACCCCAAAAATCAGCCTTTTCTGTATTCGATTTCGATTGATTTTTTTAAAAGTGGTAGGTTTGGGGTCGGGGGATGTGAAAAGGTGATGGTTAAAGATGACGCACGTGGTGCCGGCGGACCCACAGGTGTTGGTGACGGTGAAGAAGAAGGCACAGCCGTCGCGAAGTTGGGCCGTTTTGGACAGCAATGGCGAAACCACCTTGTTGGACGTCGATAAGTACGCTATCATGCATCGAGTTAACATCCACGCCCGTGATTTACGCATCCTCGATCCTCTCTTGTCTTACCCTTCTACCATTCTTGGCCGTGATGGTGCTATTGTTTTAAATTTAGAGGTTCCAACTTTATTATCTTTTTTTTTCCCTTAATTTTCT…
Gohir.D01G173400	ghMGT23	TAAATCAGAAAGGAAAACTTGGTGCTTAAACAAGTTAATCAAAACCAGAGTCGGAGAGGAGTCGTTATTCTAGTAAAATCCTCAACCTCAACGCCTACGCGATTCTCTTCCAATCGAGGAAGGCTCTGCCTGCACAACAATTATAGATATCTTCCATTTCTCGATCCTTCAATACTTATAGATCCGTTAACCCGTGTTCTTGTAACACAGGTTGGTTTAAATCGATTCCCTGATTGTGTAAAATTGAGATTTCTTTCGAGATCCATGAACCCATTTTTTAGACTCGGTCCGAGTTTCAGAGCAAATCGAGGATCCTGCCAAGTCTGGTTACATAGAATTGCCGCATTCCCTGAGAATTAGGGCTTTTTATTTTTATCTTTTTTTTTTATCAAGTCTAGG…
Gohir.D02G023100	ghMGT24	TAAAAAAAAACCTATTTCTTAAACATTTTAGTAGCAACTTTTCACATAGAAAATGTCCATAAACCTCAAATTAAAAAAAAAAACCCATCCTAATTCTAGTTTTGTTTCTCTCTTTTTTTTCTTTTTTTTTCTTTTTTATCTTTCTTGTACGAAACTAAATGCAAGAAAGCTAAGGATTAGAATCCAAATACGAATTCCAAACCTGTAGGGCTAACTATCTAGATTCGGCAACTGTATTTGATTCAGGAGATGTGTAAACAGGGAGTCTGCCACTGGAACTTTTTCCCATATCTTTGGTTTTGTGAAGGAGAAATGTGCCTGATAAAATTGTAATAAATCCACATAATTCTGTTGTAATCTCTGTCCCGCCTTGTGAATTCCAATCCTTCAAGAAAACAA…
Gohir.D02G224700	ghMGT25	CGAGACGGTGGTGAGTGATTAAATGTTCTTCCTCGGGACTCTTTAAGGAGTCGCCATTGATGAACCATGTCACGGTTCCTGCAATATAAATGAATGCTTTGATAAAAGCACAAATAGGTTTATATGGAAAGTTGAAGCAATTAATTGTTTGCAATTCAATAAAGTCAATCGAAGTTACAATAATTCCAATAGAATTGATCATTAGAAGTACTCAACTGAATAACTAACTCAACAACTAATTCAATTCTAGCTAACTAAACAGAATAAATTTGGAGAGAACCCGCCCAGGGCCTCAACCTTGCATTGCAAGGCTATAATAGCATATAAAGTTTCAACGTGTATGGTTATCATGCACATGCAAGGGAATGCAAAATTCAAATTGCTCATATAAGGAACTGA…
Gohir.D02G236300	ghMGT26	CCAAATATTGCAAATAAAAAAGAACAATAGAAGGCTGTGATGCGATCCAAGAAGTTTTTGTCTCTCACAGTCACAGCCAAAACAGCTGTTTTTCATTACTAATTGCCTCACTACTCATCCCATCCAACTCAGCAATAACTCGTCTTATCTCACTCCTCCCCTTTCTCTCCTCCTCTATATTTTAAGCGCCGACAACCATTTCTTTCTTTCTTTCAGATTTTCTTCTTTCCTCAGCTCAGACTTGTCGTTCCTTTCCAAACTCACTCCGCGTCAACCGAGTCAAGATTCTTTTCCCAACTCACCATTGTAAATACTAATACGCTTCTTCCTCTATCTCTCTTTTTTTTCTCGACTGATATTCCACCTTCGCTCTCTTTTTTTGAGGGCCGAGATCTGATA…
Gohir.D04G163500	ghMGT27	AGGATGGAAACATTCATGTATATATTCATGCATATATATATAAAGAAAAATGTGACCTTCAGTTTTCATAGATTTAAAGCATGTATCAGAGAATTTGGTTAATTGGCCTTTGATTTCTGTACATACTTCAATTATATCCCATTGATGGGGCACAACTATGGTGAAAAGCACATTCATAGTTGATGATGAAGGATCAGTTTTAAGAACCAAGCAGCTTCTTCCATCTGGCATATCCTAGGATCAGAAGGAAAATCAGCACACACCCGACTGTAATACCTCCCACAAAGATTTCAAATATCCCCTCCTTGTTGTTCCATGTGAAAGGTATGTTCATGCCGAACCATCCGGCTACTAATGTCTCGACAGCTATGGCAAACGATGCGATGGTCAACGTCAATT…
Gohir.D04G175500	ghMGT28	CGCGCTTTTCTTTTTCTTGTCTCTCACTTCCTTTCCAAGAAAACCTCTTTACAATAATTAAAAGCTGTTTCTCTTCTCACCAACTCACCAAACTCGGGCAAACTCAGTCGTTCTCAATTCTCGTTGACAGACAGCCAACTCTTCTTCATCTGCTTCTTCTTTTTTTGGTCTCAAAAGACGTGAGATCTACTCCTTCCGCTTCAACTCACTCCGCGTCAACCCAGTCAACTTTCTCTTCTTCACTCACATTGTAAATATTCGTTGTTTCCCCCCTTTTTCTTCCTCAAAATTTCCGTCTCATATTTCAACTCATTCGACTAAGGACTCACTGCTATTTGTGCAAGTAATTTCTTTAAGGAGTCGAGATCGGTTAGGTTGTGGTCTTCCAACTCTGTTCCG…
Gohir.D06G119200	ghMGT29	TTCAAGAAAGTTATGTTGTGATAAGCCAATTCTATCACGTCCAACCGACCTGTAATTGGGTATTGTCCTCTTTTAGCACCCACATGTCCCTCAAATTTATTATACACCACATCAAATAACCACCTTAGAGGAAGCCTAAGTACCCAAAGAGGACAAATAGCTGATTGAAGACGCAACAAAAATGAGAATACCCCATCGGCCTGCAACAAATCTCGACATTCTTTCCTTCTCTCTCCAATTTAACCATGCAAGGTTACATTTGCAGTGAAAGATGGAAGTGCAATTGCAACAAAAAAGAGTGGACTCTAAAATCAGAGCTTTATGTTTTGGTTTTCTTAAATTCCCATATACATTTCAGGGTAAATAAAAATTGGTAACAATGATGCCAAAAGTACAGTT…
Gohir.D07G021900	ghMGT30	CCCACTGCCCTCACCCATAAATCCCTGTTTTTAGGTACAAAAAAGAGAGATTTTTTTAAGTTTTCAATAATAGAGGTAGATAGCAAAGAAGAAGAAAAATGTGGGAATCGATCTGTTTAACATTGGCCGCTACCGCTGGTAATAACATAGGCAAAGTTCTACAAAAGAAGGGCACCGGTATTCTCCCTCCTCTCTCCTTCAAGTTCAAGGTATCATTCACCCTTTTTTTTTTCTGGGTATCTTTCTTTTTGTATATTCTGCAATGATTCATACAGCCATTATACTTTTTTAAGCTACCGTAATATTGGGTTTGGTTTGAAACTTTTCAGTATGTGTGATTTTTGGGATATTGATCATAAAAAAAAATTATCAATCTCAGCTTCAGATCAGGCCTTCGCT…
Gohir.D07G125800	ghMGT31	AAAGGTAGAGCAAATTCATTCCCATTGTCACAAGACAAAACAGGTAAGCAAAAGAGCAAGGCATGATTGAAGGATTTCAATGAATAGTAGTAGTAAACCAAGAAAAAAACAGAAGCATCCTGGAAATCTTTTGAACAAAAGATGGGTATGTCTCAAGACAATCTAAGAGGGTTTATTTTGGCATTGTTGTCCAGTGGGTTTATTGGAGCAAGTTTTATCATTAAAAAGAAAGGTCTTAGAAGAGCTGCTGCTGTTTCTGGTGTTAGAGCTGGTTTGTCCTTCCTTTTTCTTTTTTGGGGATTTAATCCTTTTCGTCTTAATTTGGGTTTTTCGTGTATGCGTTTGATTCTTTGGAGTTTTGCAGGTTATGGTGGATATGCATATCTTTTGGAGCCTTTA…
Gohir.D07G215700	ghMGT32	GAACCCAATCAGTATCAACTATCACACAACATTTAAAATATACATGGGTGTATATACACAATGTATATATGTATATGCCAACATGATGATACTTGATAAAACTTTTTTCTGCCAAATGCAGTGACCAATTACAATAGGAGGAACAACCCCTCCCATGGACCATATTTTTCATAAAGCATGATAAATTGATAATACTAAATATTATAGCATATGCAATGTTTCACCTGAAATTGGCAATGACCTGAAGCTTTACCAGGAATTCGTTTCAGTTCTATGCATCTGCATAAAAAGATCAAGCTTTATCCCTATTACCTTGAACGCATTCTATGCACCTCATGACCCAATAAGACCCTTGTGCCTCGCGTAAGAAATTATTGATGTGAAAGTCGATGTGCATAG…
Gohir.D08G070700	ghMGT33	TTTAAAATTAAAACTCATTACATGTAAATTGTAAATGTAATTGCATGAAACAAATGAATTAAATTCAAATGTCAATTGTCACCTACTTTACCACCTACTTTCATGAATATATGCCAACATAAGGATGCACCTTACATAATTTTCTTCTTTTTTGCCAATTACAATATGACCTTCCATGCATGGATTCAAAAGCATGATATAATAATAACAGTGACAATATAGCACGCAGTTGTTCACCTGACATTGGCACCTGAAAGTTTAACCAGGTTGGGCCAAGATATGGTAAGGAATTCATTGCAGTACTACTTTTATGCTTCTCTTCAAGCTGTGTGATCCTCAGTACTCCAAATGTGATTCTATGGACTTCAAGACCCGATAAGACCCTTGTGCCTCGCATAG…
Gohir.D09G090700	ghMGT34	GATTTTTTTCATCCACTAAACCTGAATCCAGCGCGAAGAATTTGCCACTTAAAAAAGAGGAAATATCATTTATTTATTTATTCAAATCTAGATTTTTTTTTCTAACAAAAACTTTAATCTTAGGTGAATGATCATTTACCAACTATAATCTCTTTTTTTTTGCCTTTTGAAAATGAGTTTTTCTTGAATTTTGTTAAATAAATGAGCTTCTCTCCACTATAATCCTCTCATGCCAAGGTGCTTTTCCAAATCTTGGGTTTTCTTTTTTAATTTTATATTATAATTTTGATTTATTAATTCGCAGCTTACATCTGCTATTTACTTAATTAAACAATGGCATCGATAGTTGATTTCTTCGAGTTAAGGTAGTTTCTTTTATTCTAGAAATAATCTGATTGC…
Gohir.D10G152400	ghMGT35	ATATTCTTTAACAAGAACAAATTCCCAGCGTCCCCAAAGCCAGGTTTTCATGTTCGATTTCGATCCAAACTCCAAAGCCATCCACCTTTCTTAAAAAACAGGGCAGCTCTCTTATTAAACATCAGAAAGAATAGAAGAAGACCTTTAAGTTCATGTGAAAATGGGGAAATTTTGAAGTGTTTGGAAAAGAAAAAAAAAACAGTTATCTTTGTTGCTAGATCTTTGAAAAGCGGGGGTCGTTGGGTGGGAGTAGTTGAGTGTGATGGTAAGAAATGGTGCACGTGGTGCCGGCGGACCCTCAGGCGGTAGTAGCGGTGAAGAAGAAGGCGCAGTCTTCTCGAAGTTGGGTCCTTCTTGATAGCACGGGGGAGACTACCGTGCTTGACGTCGACAAATATG…
Gohir.D11G063300	ghMGT36	ATGTAATGACGACCGGCAGGTGAGAAAGTACGTTCTCCTAAACGACCTTTCTGCCCAACCCGCAGCCAACACCATTAATTTCAAAATTAACCAAAAACAAAAGGGGAGAATTGAAGCGGTCTAGGGTTCTGACGAGACGAATCCAATTTCAATAAGCATATTATTGCTGTAATCTAACGAGACGAATCGAATTCCAATCAGCATATTATTACTGAATTCATAGTTGGGAAATCAATCTCTCCCTCTCTTTCTCCCTCTTTGTATATATATGTATGAATGCATGTGTATACATGTATTTATAGATGTACTCCAGCAATCTCAAGGGCTTTATTCTGGCGATGGTCTCTAGCGCCTTCATTGGCTCCAGCTTTATCATCAAGAAAAAGGGTCTCCGAAAGG…
Gohir.D11G065800	ghMGT37	AAAAAAAAAACCTTATTTATTTTATTTAGAAAGATTGGCCCGAAAATCTGACATGTGAAAAATAATTTGTGGTACTAACAAAGGCAGAATAGTCCAGTCCAGCAGTATGTTTTTCTGTTTCTTAATTTACATTACATACTCGTATTTCCTTTCAATAAGGTAAGCAAGACTATACAATGTAGAAACATATGACGGTGTAATGTTTCTATGACCAAGAATATGCTACTCGGCACAATAACAAATCGATCCTAAGCTATTTGTGTTACTAAAAATCGAGTCTGTGAAGAACAAAGAATCAAAATCAATGTTTCTTACTATCCCTATATCAGGGGCTTTGAGGGAGCACCCCATCTCCATTTAACATCTTTGCACTCTCCTCATCCATTGCAACCCTACTCC…
Gohir.D12G033500	ghMGT38	TACCAACCAAATACAAGTTTGGAGGCTCCATTTTAACCATTAGTGTTTCTTAAAAAGGACATCTATTTGCTCAGGCTCTCTTTTTCTAGAAAAGCCGACGTTGCTGCTGACTTGTAAAGTTGATTCCTGGAACCCAAAGGTTTGGACAGATAATCAAAAGCTTGATTCCAGTTCAACAAACTATATTAGTATGAAACATGGCAAAGATGTTTTGTATGCTTGAAACCTAGAAAAACACCAACTCCAAGACAGCGTTTTGAGTTATAACAATGAAAAAGAATCAACCAAACCCCAATCATTACAACACCTCAACCTCAACAAAATGCAAAAAGAAGAATCGCTTTGTCTATCTACAAATGTAAGTGAAAATGAGATCACCACTGTCATATGGGAACCGAT…
Gohir.D12G164400	ghMGT39	CGTTTTCCTCTTTTTTTTTTTTTGTTTTTTTGAATGATTGAATTTTATTTTGTTTTTAGGGGAAGGCAGTAGATTATTTGATTATCTGTTTATTTGCAGATTAATTACATTAAAATGTTACCAAATCAACTGTAAAAAGTCGAAAAGCGCAAGAAACGCTTCCCGGAATTTAATGGTGGCAGATCAGTTTCCAATTTCCATCCGCTGTTTCACTGACTCTCTTCGCTTCCATTTGGTCCAACAAAGCGATCCCTGATTCAATCCACCGCTTTTTCTGAGTTTGGACCTTTGTTTTCAAGTGGTATAATAAATTTTTCTACCCTTTTCTTAATCGTTTTTTTCCCTTTGGTTTATTGTTCCTGGAATTTGCTTGCTTTCACGCTTATTCTTCTAAACAAA…
Gohir.D13G045700	ghMGT40	AAAGACTAAACGGCACCATTTTCTTACCGCTAAATTTCAGTATCGAATGATCCTCCAAAAGAAAAACCCCAAAAATGAGGAGTCAACCTCCGTCGTCACCGCCTAAACCCGAAGATGACCCGGATCCATCGGCCCGACCCGCTTCGTTCCCTAACCAAACTCTCCCTCCCACCACCGCCACCACAGCCGCCGGTCATCGGAAAAAAGGGACCGGTGTTCGAGCATGGCTTATACTGGACTCGACATGCCAAACCCAGATGGTGGAAGCCGGAAAACATGCTATCATGAGACGTACGGGTTTGCCTGCTCGAGATCTTCGGATCTTGGACCCGCTGTTGTCGTACCCATCGACGATTCTTGGTCGAGAAAGGGCGATCGTGATTAATTTGGAGCATATCA…
Gohir.D13G228400	ghMGT41	CGACAACGATTTTGGAATTTGCAATTCTCACCAGTTTGTATTATAGCAATCGACATCAACCTGATGAACTGTTTGATCCACGCTAATGTCATGTCATGGACCGAGACTCGAGCTCAAGCTTCAGTAGCAAACGCAGACCTAAACTGACACACAAATACGAACCATTGCACTTAGTGTTTGTTTGGCTGCTTGGTGTGCAATGCAATTGTGATTTTCTTCCCATTGAATATTCATCAGCGATGTGAAGTTAAAAGGATTTGGGGGTTCACTGAACTGGCTAGTTTCTAGAACTTTATTTATTTTTATTTAAACTTGATTCGTATCTAAATGAAGTTTTTGTTTTAAGTTTAATGTCGAATTATGTTAAAAGGTTTTGTTTTAGGTATAAATTAAATGTTA…
Tc01v2_t013790	tcMGT01	ATGAATACACCGGGTAATGATTATTACGCTTCCGAGAGCAATGAAAGGAAGAAACACCATCATCCTAAAAATCATCCCAGTCGAAACAATGGAATAGGAGGTGATCTTTGGACTGATGGACTTATTTGTGCTTTTGAATATGTTCATGGCCAACCTAAAGCAGTTCAGCAAAGTTCTGGTGCAAAGATCTGGTCTAAACAATATGCTTCAAAAGATGCATCTAGGAAGCAGATTTACGCATATGAACCGGCAAATTCTTTGACCGAAAGTGTTACTTCCAACAATTTAGCTAAATCTGCACCCTTAACAGAGTCCGCACTCACAGCTAAAGATAATGAAAAAAACTGTAGCAGGAATCTCAATCCTGGGGAAGAGGTCCCAAGAACTTATTGGAAACCA…
Tc01v2_t019400	tcMGT02	TTGGGAAAAATAAGCGGACAAGACAGGTGAAATATTGGTAAAGAGGTAAAGAGGACCGGCAGGTGAGGAATTACGTTCCCCTCTCAACGACCTTTCTCTCCTTGCTGTACTTTACATCCGGCAGGCTACGAAAGAGAAAAGTTTGAGAAAATAAAGAAGAGGAAGAAGGTAGTTGTGATGAGAATTGCAGAGGTCTAGGGTTCTGATCAGACTTAACCAACTAGCATATTTAAAGAGAAAACATATAATACATGAAAGTAAATCTCTACATATATTTGTATGTATGCATGTAGATATGTATGTATAGATGTACTCCAGCAATCTCAAGGGTTTTATTCTGGCGGTGGTCTCGAGCGCCTTCATTGGCTCCAGCTTTATCATCAAGAAAAAGGGTCTTCG…
Tc01v2_t022150	tcMGT03	CATTTTTTAACTCTTCACCCTCACTGTTAGATTTCCACTGTCTCTGTCAGGCTTCACCACCGCCCCATGCAGCGAATCCCTCCCTAATTTCCTCCTTCTCCAATCACTTTCTTCATCCTCTCTTAAACCCTAACACTCCCTTTTCTCTCCTCAAAATTCTATAAAACTTCCCCTACGGCCAACGCTCATCTTTGCTCTGTTCCAAGAGTAATTCTCTGTGGTTTTTCTTTTTGAATGGCTCGAGAAGTGTATTTGGTTCCAGTGGAGACGCAAGTAGCTTCGCTTAAGAAGAAAACGGCGGTTACAACGAGCTGGATTTCAATAGACGCCAAGGGGCAAGGTGTGATTCTTGACGTCGACAAGTATGCTGTAATGCGCCGCGTTCAGATTCATGCCAGA…
Tc02v2_t001960	tcMGT04	AAAAGATAAAGCGTAGCGGTCATAAATCAAACCAGAGTCGGAGGGGAGTCCTTGTTCTGGTAAAAACCCCAAACCCGCCACGCGCCCTTTCGCTCTCTCTCTCTCGCTCTCTCTTCCATTCCAAGAAACCTCTCCCTTCTTCGCAATCGCAGCTCTTCTCGTTCTCACCAACTCAGCAAACTCTCATCTATCTGACCCATCTATCAGCGCCGACTACCCCACACTTGTTCATTTCCCTCTTTGGAGTCGAGATCCACTCGCTTCTTCCCCAACTCACTCCGCTTCTACCGAGTCAAGATTCTTCCCTTGCTTACATTGTAAATATCCTTTTGTAATTCTTTCTTTTTTGGTCTCATTTCTTTGTGCCGACTGATATTCCACCGTCGCTTTCTTTCTCTC…
Tc02v2_t005250	tcMGT05	TATAGTAGTATCGATCAACGACATAGAGGAGGACGAGCGTAAGTTAGTGAAAAGCCTTGCGAAGTAGGGGATCATTAAGCTATTTTATGGGGTCCGTACAGAAAGATGGGAAGTTTCCGACAACGCGACGGAACTAGAAAGAAATGAGTCGAGGACTTCCTGATAGAGAGAAAGAGGGTTTTAGATCTTTCTCTTTCTCTCTTTCATTATCACTTTCCATCTGAACAAATCACAGCAAAAGAATCGATTAAAACGTTGCGTTGCAGAGTCAAAAGCTGTTCGCTTTTTTTATTTTTTATTTTAAATTTTTTTTCTCGAAGGCGGATTCTTGCTCTTCTTTTTGGCGGGAATTCGAATTCTCTCAATCTTTCCATTTTTTATCATCAAGACAAAAATATT…
Tc02v2_t007390	tcMGT06	AAAAAGATGAGCTATTTCTTGACTGAAAATGAAATTATAAAAACAGCAGGGGCATTTAACCCTGCAACAATCTTCCCTCCACTCCGCCCCGCCTGAATAAACAAATTAAATACACCAAAAAGAAAGTCAAAACTGATTCGTTTATGGAAGAAGAAGAAGAATCGGAATCAGAACGGAAAAAGGACAAATCTCCTCCCAGCTTTCCCCTAAATTTCATGGCCCCTTAATTCAAGATCAAAAGAAAAAAAGAAAACACAAAAGATTTGTAGGATAGAGAGTTTCAATGGGCAAAGGCCCCTTCTCATTCCGCCGCTCCTCCACTCGGCGACGGCGTCCGAAATCCACTACGGTCCCACAACCGCCGACGCCGACGCCCCCGCCGCCGCCCGCTGGAGCCGC…
Tc02v2_t009780	tcMGT07	GAAGTAATAACTACTAACACTTGCGCCAAAATTAGACGACGAAGAATATAAACGACAGTATTCGTACCACCGACTTCCGATGTCGATGAACCTCTAAAAATAACTCCAATGAGATCTCAACCTCCACCGCCTCCGCCCAAACCCGAGGACGATCCGGATCTTTTAATTCGGGCCACTCCAACCTCGAATCAACCTCTCACCACATCCGTTGCGGGGCATCGGAAAAAAGGGACCGGTGTCCGGGCATGGCTTTTACTGGACTCAACGGGACAGACCCAAGTGGTGGAGGCGGGAAAGCATGCTATCATGAAACGCACGGGTTTACCCGCTCGAGATCTTCGGATCTTGGACCCACTTCTGTCGTACCCGTCGACGATTCTGGGTCGAGAAAGGGCGATC…
Tc02v2_t010340	tcMGT08	ACCGGAAACGCGATTAGTATTACGACGATAATCTTCTTTAAATTTGGTTGGAGAATAATTATAGTATAACCTGAAGTTTCTGAGAAACTACCACCACAACGACGCACGTCTCCCTTTTTCCTTAATCTATCTCGTTCTCTACGACGTTTTCCTTTTTCCAAAATATTTTGAATTTGAATTATTCAATATTTTGTCATTTCTGGTTGGTTAAACCACTTTGAATGAAGCCACACTGAAGAATTTTGGATCTTTCCTCATGATGTTTTTCTGCTTGGGTTTCAACAGGCTTTGCTAATTTCTGATCTGGGATTTCTTGTTTACGTCAAGATATTCCCGTTTTCCAAGATTTTTTTGTAGAGGTAAGCAAATTATTATGGAGTTTCTGGCTGTCGCAATGTT…
Tc02v2_t028490	tcMGT09	TATTTGTCGAATTACACATTAATGGCTCTAAGTGATCAAAAATATCTCCCACATCTTCCAAATCGCAGAGAGAAAAAAAAAAAAAAAACAGAGAAAAAACGTTAAAAAATGTAAGTTTAAGATGTTTCATTACGAAACTCGACAGCCAACGAGGAAGGAAAGGCGTCGAGAAGTTAGTTAATGGTTGGCGCTTCTAGTTTGCGTCGACTGTGTCACTATCTCTCTTCACTCCCATTAAATGAACCAACGCACTCCCAGATTCCTTCCACGGCTTTGCTGATTTTTCTGGAAGTTTCTTTTAAAGTGGTATATTCATTGATCTTCCATCGTTTGTTAATCTGGGTTTCTTTTATTTTCTATTTCTTGGTCATATAATTTGCTTGCTTTCACGTTTAATCT…
Tc04v2_t004370	tcMGT10	GCAAAGCCAAAAGCCAAAAGCCAAAGCAACTTCTTCTTCTGCCTTTATTTGAATTGGAATACGTAGCTTTGTTTTTCGTACAAGGTTTTTGGTATTTTCTTTTTTTTTTATTAATTGGATCAGCTCGTAGTGCCCGAACCTCCAACCAATTAGCATTATTCGGTATTCATCGCAACCAAATCGCATAAGCATAATCAAAGACACCGGTGGGGGCCTTTCGGATTCCCATTTTCCGTTAAAGGTAAGGGCTAGCTCCGGCAAGCTATTTTTTTTTTTAATTTTTATTTTTGGTTTTCTTTGTGTTTTTGTGGGGTTAATTTTAAGCAAGGATAAGAATTCCGGCATTGAATTAGATTAGATCTCCCAAGACAAGACAAGACAAGAATTGGATCTTTTTTC…
Tc04v2_t015960	tcMGT11	GATTCAGAGGCAATCTTAAATTGTAGTTGTTTCTCTAACGTTTGTGTAACGAACTTACCATTCACGTCTCTCTCTCTCTCTCTCTCTCTCTCTGCCTTTCTGTCTTTCTCTTTCATTTTGCGAAGAAAAGGATTAATTTTCTCTCCCCATCAAAGGTCAAACCTCTCTTTTTCTTCATCAGAATTATGGACGTAGGTTTCTAGCTTTGTCCCATTAATCCCTTTTGCAGTGTGCCAAGAAAGTAAAAAAAAAAAAAAAAAAAAGCAAGTCTAATATATATATATATAAGAAGAAAAAGTATGTTGTATCATGCAAATTACATCAAGGTTTCTCTTTTAAATTGTTTAATGATGTTTTTTTGGATTTGATATGGACATACACAGGGGAATCTGGATTGGA…
Tc04v2_t020050	tcMGT12	TCTAAAAGGAATAAATTCCCAAACTCAGCCTTTCCTCATTCTTGATCCAAAGCCCACAAAAACTGACCCCGAAAAGCCTCTGATTAGACATCAAAAAGGACGGAAAAAGAAACCCCCTGTTAAAATTTATGTTGAAAATGGGGTTACGTTAAAAGTAGCTTGGGGAGGGAAAGAAAAAGTTTTTTTTTGTTGTTTGGTAGATTTTTGAAGGGAATTTTTTCCTTTTTCTCTGCGTGGGGTTGGGTCGGGGGATGTGAGGGTGATGGTCAGAGATGGCGCACGTGGTGCCGGCGGACCCACAGGCAGTGGTGACGGTGAAGAAGAAGGCGCAGCCGTCTCGAAGTTGGGTCCTTTTGGACAGCACGGGGGAGACCACCGTGCTCGAGGTCGACAAATATG…
Tc06v2_t003480	tcMGT13	ATGGATTTATTCTTCCAAGAAATTTCCCAAGATTTTGTATAAATTAAAGCTTGGAGAGGTGCTTTATGCACCCTGTATCTGGAGCAAGATTCGAATCCATTTCCCCAAATCAAAAAAAAAAAAAAAGGTTTGTAAGGCATGGCCGAATCTGCATTGCCAGAAAACAATGGAGATCATGCCGTTCCTAAGATAAAGCTTGGAGGCGGTTTTTATTACCTCCACAACCGGAGGCTAGGACAAGGCCCCAGAAATTGGATCCGTGTTGATGCGCTTGGGAATTCCCAGGTCATCGAGGTTGATAAGCTCACTATGAAGCATCATTGTGATCTCCCAGCTCGGGATATACGGCTTCTCGATCCTCTGCTTGTTTACCCCTCAACGATCCTTGTTAGGGAGAAG…
Tc06v2_t003490	tcMGT14	ATGGATGTATTGGAGTTCCCGGAGACAGGCCAAGGCCTCCGATCTTGGATTCGTGTTGATGCGTCGGCAAATTCCCAAGCACTTGAGATCGACAAGTTGACCATAATACGTCGTTGTGGTATATCAACTCGTGATCTACGGATTCTTGACCCCCTGTTTGTTTACCCCCCAACCATCCTTGGTAGAGAGAAGGCTATCGTTGCTAATTTGGAGAAGATGCGGTGTATTATCACCGCTGACGAGGTCCTGCTCTTGAATACCCTTGACAGAAACGTTTTGCAGTACGTGATGGAGCTGCAGAAACGACTAAGAAGCACTGGAGTAGCTGAATTGAACCCAGGAGGCAGCGGTTCCAGGAGTTTTAGGAGCACGTCTTCCTATAGTCCCTTCGAGTTTAGG…
Tc06v2_t003500	tcMGT15	CCCAGACGCATACAGAGTGGGAGAGAGAGAGTCACAGACCAACAGAAGTAACAAACCAACGAAAACTCTCTTCGCATCGTACCCCTTTTTTCTAATGTATTAAAACCAAAATCTTCAATCATAGATTCTCCAGTAAGATTCTCGGCTTTAGCTAATTGAGTAATAATTACACCGCCCTCTTATATTTTATTTTAATTTTATTTATAAAAAAAGGTATTAAATGAAAATTTCGCATTTGAAGGGGAGTTTCTCTCTTCCTTACACAATCTTCCTCCTTACGTCTTTCTGTCCTCGATAATCCGCTGCTGCCAAGGTGCTTTTCCAAATCTAGGGTTTCCTTTTTCCTTTCTGTAATCTTTGGTGTTGTCATAATTTGATTTACTAATCTAATCGTTTATT…
Tc06v2_t012890	tcMGT16	CCAATTGGCAATTGAAGCTTTTAGCCATAGTCCAAATTCTCCGACCATTTTGTTATTCTTCTTATTTTCGCATATATTCTTTTGTGCTAGTCTTTATCTTTGGGTTTTCGCTTTTCATTTGTTAATTTATAAAAATCGACCCTTCCATCGTCAGCTTTTCCTTCTGCTTAAGCTCAAACAGCATCTCAATTTCAGGTATTCTTCATTTATTTATTTATTTATTTTTTAAATTGTTTTCTTGTTTAATTGTTTAATCTGCAATATACCATTGGGATCACCTCTCACAAGTAAAATACCGGGGAATTATTTTAAAGTACAGTGGATTATAGGGGCTTTTATGGTATTCTGCTTTATCTTCTCCAGCTGCCGTTGACGATTCCCCTGGCGCTCTCCTTATTT…
Tc09v2_t020330	tcMGT17	ACATTCAGCTTGTCACAAGGCAAAACCGGTAAGCAGAAGGGGAGGCAATGATTGGGAGATTTCAATGAAGAGAAGTAGAAAAGAAGGAAAACAAGAAGAAAGACACAGAAAGACAGAAAGATGGGTTTGTCTCAAGACAATCTAAAAGGTGTTGTTTTGGCATTGTTGTCAAGTGGGTTTATTGGGGCAAGTTTTATCATTAAAAAGAAAGGTCTTAGAAGAGCTGCCGCTGTTTCCGGTGTTAGAGCTGGTCCGTGTTTTTTTTTTTAATTTACATTTACTGGTGTAAATTTGGGATGTTTATATTCTTTGATTCTTTGGTATTTGCAGGTTGTGGTGGATATGCTTATCTTTTGGAGCCTTTATGGTGGTTGGGCATGATCACAAGTATGTTGGGAT…
Tc09v2_t024580	tcMGT18	GACAAAAAAACTACCTTTGTAGAATACATTTATCGCTTCGTTGTTTTAAAGCAAAAACCAGATTCTCTCTTCTCTTATGAGAACAAGGAAACAATGGCGCTAACTCCCTCTCCTTCTTCTTCTTATCCAAATCTTCTCCAATTCTCTGTTAAATCTCCATCTCCGTCCGTACATTATCTTCTCTTCGGTTCTCCATGGTCAAACGCTTCTCCGTTTCTGCTTCAAAAGAGCGGAGTTCCTCTGCTTCCGGTCGTAGTGAAACCGTCTTGTAAGAAGATCAAGTGCTTCGCTAGATCCTCAACGGAGGAGGACTGCTTGAGCGAGCCGGAAACATTGACCGCTGAGAATGTTGGTGAAGATGATGATGGTTTAGGGAGGGAAGATCCGAACTTGCAGGAA…

## Sheet: CDS
Gene ID	Gene ID	CDS
CCACVL1_04197	ccMGT01	ATGGGAGAGTGGGTCATTGGAGCATTCATCAACCTCTTTGGCAGTATTGCCATCAACTTTGGGACAAACCTTCTTAAATTAGGTCACAATGAGAGAGAAAGACATTCTCTTATGGATGGTGAAGGGATAGCTGGAAAGATTCCGTTAAAGCCTATCATATACTTTCAAACTTGGAGAGTTGGTATACTATTTTTTATGCTTGGAAATTGCCTAAACTTCATTTCCTTTGGTTATGCTGCTCAGTCACTTCTTGCTGCCTTGGGATCTATTCAGTTTGTATCCAACATTGCGTTTGCTTACTTTGTATTAAACAAAATGGTTACTGTAAAGGTACTAGTTGCCACAGCGTTTATAGTTCTTGGAAATATTTTTCTTGTCGCCTTCGGCAACCACCAGTCC…
CCACVL1_06282	ccMGT02	ATGAAGGTGCAAACACCAGCCAATGGACAAACAGAGGCTTCTTCTACGAGATTGGATGGGCAAAAAGTGAATGAGCCCTCTTCCAGTTATGAGTCAAGGGAGAGGGAAAATGTTGCCGTTTCTTTTGAGGAATACAGAGATGGCCAGAGCCTTCAATTGGGACAGTTTCCAGCTATGGAAAGATATGATGGCAGTTGTTGGGTACCCATAGGGTGGGAACGAATTTCAGAACTTGTAAAAAATGTGCAAGTCAATGGAGGCTGGGCTTCGCAGCAGTTTGATTTGATGGATAATGAAGAGGATTTCACTGTTGCAGATTTAGCAGCTCCATACTGGGAGCGCCCAGCAGGACCCATATGGTGGTGCCATTTGGCTGCTGGTCACCCTACTGCTGTGTCT…
CCACVL1_06479	ccMGT03	ATGGAAGAATCACATGGCCATATTCTTCCTTTTGACGTTCCTGAATCTACGACATCTTCTTATAACAATGAAAGGCTTAATTCAAGTACACAATCAAGTCGTGTTTCTGGCTTTCCAGGTGTGAAGAAAAGGGGTCACAGCAGTCGTTCATGGATAAAGATTGATCTAGATGGGAATGTGAAGGTTTTGGAGCTTGATAAGGCTAAAATTATGAGACAGTGTTCTTTGCCATCCAGAGACCTAAGGCTTTTGGACCCTTTGTTTATCTATCCTTCAACAATACTAGGAAGAGAGAAGGCAATTGTGGTCAGTTTAGAGCAAATAAGATGTATAATCACAGCCGAGGAGGTTATCTTGATGAATTCTTTGGAAAGAAACGTTGTTCAATATGAGTCAGAA…
CCACVL1_06907	ccMGT04	ATGGGGATGTCATCAGACAATGTTCGTGGACTTGTTCTGGCTCTCTCTTCAAGCATTTTTATTGGATCTAGCTTTATTATCAAGAAGAAGGGTCTTAAGAAAGCAGGGGCAACTGGACTCAGAGCTGGTCAAGGAGGGTATTCTTATTTATATGAACCTTTCTGGTGGGCTGGGATGATAACTATGATAGTTGGGGAGATTGCAAATTTCGCTGCTTACGCGTATGCTCCTGCGATTCTTGTAACCCCATTGGGAGCCTTGAGTATTATTTTCAGTGCAGTGCTAGCACATTTTATCCTGGAGGAGAAATTACACATTTTTGGTGTGCTTGGATGTGCTCTTTGTGTGGTGGGCTCTACAACTATTGTTTTACATGCTCCCCAGGAAAGAAATATTGAT…
CCACVL1_10058	ccMGT05	ATGGATGTTTTTGAGTTGCCGGAAACAGGCCAAGGCCTTCAATCATGGATTCGGATCGATTCTTCGGGGAATTCCCAAGTCATTGAGATTGACAAATTGAGCATAATTGCTCGATGTGGTATCTCAACTCGCGATCTTCGGATTCTTGATCCCCTCTTCGTTTATCCCACGACGATCCTTGGCAGAGAAAAGGCCATCGTTGCAAATTTGGAGAAAATTCGGTGTATAATAACAGCTGACGAAGTTTTGCTCTTAAATTCCCTCGACAGAAACGTTTTGCAATTTGTGATGGAGTTGCAGAAACGTTTGGTCGCCAATGGCGCAGCTGCTTTGAACCCAAGAGGCAGTAGCAATAGGAGTTTTAGGAGTACTTCTTCGTATAGTCCATTCGAGTTTAGG…
CCACVL1_10059	ccMGT06	ATGGATGATTTCGAGTTGCCGGAAACAGGCCAAGGCCTTCAATCATGGATTCAAATCGATTCATCGGGGAATTCCCAAGTCATTGAGATTGACAAATTGAGCATAATTGCCCGATGTGGTATCTCAACTCGCGATCTTCGGATCCTTGATCCCCTCTTTGTTTATCCCACCACGATCCTTGGCAGAGAAAATGCCATCGTTGCAAATTTGGAGAAAATTCGGTGTATCATAACAGCTGACGAAGTTTTGCTCTTGAGTTCCCTCGACGAAAAAGTTGTGCAGTTTGTGGTGGAGCTGCAGAGACGTTTGGTCGTCAATGGCGCAGCTGCTTTGGACCCAAGAGGCAGTAGTAGGAGTCCCTTCGAGTTTAGGGCTCTTGCAGTTGCTTTGGAAGTTGTT…
CCACVL1_10060	ccMGT07	CATTTGGTTACTTTTGAGCAAGTTGGTAACTCATCTTTTGTTCCAAAGGCAGCAGAATTAGAAATTGAAGCATATCCTCTACTGGATGAGCTTACATCAAAGATCAGTACATTAAACCTGGAGCGTGTTCGCAGATTAAAGAGCAGACTTGTTGCATTGACTCGCAGAGTTCAAAAGGTTAGAGATGAGATAGAGCAGCTAATGGATGATGATGGAGATATGGCAGAAATGTATCTTACTGAGAAGAAGAGAAGGATGGAGTCATCATTTTACGGTGATCAATCTCTGTTGGGATTCAGATCAAATGATGGACTCTCTGCTTCTGCTCCGGTATCCCCTGTTGCTTCACCACCTGAATCCCGCAGGCTGGAGAAAAGCTTGAGTATTGCAAGGAGCCGC…
CCACVL1_14415	ccMGT08	ATGGCTCGGGAAATTTATTTGGTTCCAATCGAAGCTTCGCTGAAGAAGAAAACGGCGGTTACAACCAACTGGATCTCGATAGACGCCGATGGGCAAGGCGAGATTCTTGACGTCGATAAGTATGCTATAATGCGCCGCGTTCAAATCCATGCTAGAGATCTTCGTATTCTTGATCCCTTGTTATCTTATCCTTCCACTATTTTAGGCAGGGAAAAGGTCGTTGTTCTCAACTTAGAGCACATTAAAGCTATAATCACAGCAGATGAGGTGCTCCTTAGAGATCCATTGGATGATAATGTAATTCCCATAGTTGCCGAACTTAAAAGGCGATTGCCTCAATATAATCTCACAAGCCAAGGCCAAGGGGAAGAGGAAGAAAACCCTGGTTTGCGCAATGAT…
CCACVL1_16275	ccMGT09	ATGGGGGTTGTGAGGAGCTGGAGCGAGGGCATGTCCTCGGACAATGTCAAGGGCTTGGTTTTAGCGCTTTCTTCCAGTCTCTTTATTGGGGCAAGTTTCATTGTTAAGAAAAAGGGATTGAAGAAAGCCGGTGCTTCTGGCATCCGGGCAGGAGTTGGAGGGTATTCTTACTTGCTTGAGCCACTTTGGTGGGTTGGCATGATAACTATGGTCGTTGGGGAAATTGCTAATTTTGCAGCTTATGCATTTGCACCAGCTATATTAGTCACTCCTCTTGGTGCTCTCAGCATTATAATCAGTGCGGCACTTGCACATATCATTTTAAGGGAAAGGTTACACACCTTTGGGATTCTTGGTTGTGTTTTGTGTGTTGTGGGCTCTACAACAATTGTTTTGCAT…
CCACVL1_16701	ccMGT10	ATGGGAATGTCGGAAAATTCCAAGGGAGTGATATTAGCAGTGGCGTCAAGCGCGTTTATCGGCTCGAGTTTTATTCTTAAGAAGAAAGGCCTCAAGCGTGCTGGTGCTACTGGTGCTCGCGCAGGAGTCGGTGGTTACACCTACTTAGTTGAGCCACTTTGGTGGGCGGGCATGATAACAATGATAATTGGAGAGGTTGCAAATTTCGTGGCTTATGTCTATGCTCCTGCTGTTCTAGTTACCCCACTTGGTGCATTGAGTATAATAGTGAGTGCTGTTCTGGCACACTTTATGTTGAATGAACGAATTCAGAAAATGGGGATTGTAGGATGTGTGTCCTGCATTGTAGGTTCAGTAGTGATCGTAATTCATGCACCTCAAGAGCATGCTCTAAATTCA…
CCACVL1_16896	ccMGT11	ATGGGAAAAGGCCCCTTCTCTTTACGCCGCTCTTTCAGTCGGCGGCGTCGTCCAAAGTCCACAACGGTCCCACAATTGCCAGCGCCGGGGCCCAATGGAGCCGCTTCTTCATCTTCACCTCCTCCTCCGAGCGCGGGCAATTTGATTGCCGGTGGTGGTGGCGGTGGCGGTGGAGCTGGGGCGGTTGTGGCGGGGAAGGGGAAGAAGAAGACGGCGGGAGCAAGGCTATGGATGAGATTCGATCGGATGGGGGTTTCGGAGTTGGTGGAGTATGATAAGAATGCGATTATTAAAAGAGCTTCGATTCCTGCTAGGGATTTGAGGATTCTTGGCCCTGTCTTTTCTCACTCTTCGACTATTCTTGCCAGAGAGAAAGCCATGGTTGTCAATTTAGAGTTT…
CCACVL1_17107	ccMGT12	ATGAGAACTCAACCTCCACCGCCACCGTCTAGACTCGAAGACGATCCGGACCTAACACCTCGGCCCACTCCAATCCCCAATCAGCCTCTCCCCGTCGCTGCTCATCGGAAAAAAGGAACCGGTGTTCGAGCATGGCTGTTATTGGATTCCACGAGCCAGACCCAAGTGGTGGAGGCCGGAAAGCATGCTATCATGAGACGAACGGGTTTACCAGCTCGAGATCTTCGGATCCTCGACCCGCTTCTGTCGTACCCCTCCACGATTCTGGGTCGAGAAAGGGCAATCGTTATCAATTTAGAACACATCAAGGCAATTATCACTTCCCAGGAGGTTTTGCTCTTGAATTCTAAGGATCCCTCTGTAACGCCTTTCGTTGATGAGCTTCAGAGCCGGATTTTG…
CCACVL1_17163	ccMGT13	ATGGAATTAGCTCAGGAAGATCCAGCTGGAGAAGGAGAAATTGAGGAATTGGTTAGAGTATCCTCTGCTAATATTCCTCTTGTGGAGACTAATCAGCATAGAACACATTTTCCTGGTATGGTGAGACAGAAGGCATACATTTTTGACAGCCTCGGAAATTATTATAATAAGGAATGGGATCTTGCTGAAGGTAGTGGCAAGGAGTTTTGTTGGTACCATGTAGAACTTCCAAAGGGAAATCAGAAACTCTCTCAATCTGCACAATACCTTATAGATGTTCTTTGCCCGCCATTAAAGCTTCAAGACATTCTCTCGCTTGTTAGCAATGGACCATTTTGTGGACATGTTGATGGAGCCCTTGTATTTAGGGTTAATTCACCTGGCCCTCCCTCCAGTAAC…
CCACVL1_25517	ccMGT14	ATGGCGCTAACTCCCTCTCCTTCTTCTTCTTCTTATCCAAATCTTCTCAAACTTTCTGCTAAATCTCCATCTCCGCCCGTAAATTATCTTTTCTTAGGTTCTCCATGGCCAAATCCGATTCTACTTCAAAAGAACGGAGTTCCTCTACTTCCGGTCGTAGTGAAACCGTCTTATAAAAAGATCAAGTGCTTCGCTAGATCGTCAACGGAGGAGGATCGTTTGAGCGAGCCGGAGACTTTGGCTGCTGACAATGTCGATGACGATGTTGACGATGGAGGGAGGGAAGATCCGAAATTGCAGCAACGCCAGGCTTCTGCGGTTGCGACGCAGAGGAACACTTCCTCTTTCAGTGATTCTCTTTCGCTTGGGATTCGTGACCCTGTCTATGAGGTGGTAGAG…
CCACVL1_29622	ccMGT15	ATGGGTTTGTCTGAAGACAATTTAAAAGGGGTTGTCCTGGCATTGTTGTCGAGTGGGTTTATTGGGGCAAGTTTTATCATTAAAAAGAAAGGTCTCAAAAGAGCTGCTGCTGTTTCTGGTGTTCGAGCTGGTTATGGCGGATATGCATATCTTTTGGAGCCTTTATGGTGGCTGGGCATGATCACAATGATTGTTGGAGAGGTTGCAAACTTTGTGGCATATGCATTTGCTCCGGCAATTCTGGTTACCCCTCTTGGTGCATTAAGCATCATTGTCAGTGCTGTCTTGGCTCACTTCATCTTGAATGAGAAGTTACACCTGCTAGGGAGGTTAGGCTGTGTCATGTGTATCTCTGGTTCAGTCATAATTGTTATCCATGCACCACAAGAGAGCCCAATC…
CCACVL1_30870	ccMGT16	ATGAATAAAGTAGGCAATGATTATTCAAACTCAATGAGCAATGAAATGAAGAAACAAGATTATAACAAGAATCAGTATCAGAGCTGGAGCGATGCAATAGGAGGTGATCATCTTTGGACAGATGGACTTATTTGTGCTTTTGAATTCATTCAAGGTCAAGGACAAAGAAAAACACTTCAGCAAAAAGCTGGTGCAAAGGTCTGGTCTACACGGTATGGTTCAAAAGAAGCATCTAGGAAGAGGATTTATGCACATGAGCCGGAGGATTCTAGTGTTAACAATTTAGCTAACTCTCCACCCTTAACAGATTCTGCATTTACAGTTAAAGATACATTGTGTGAAAAAAATTGTAACCACAGGAATCATAATCCTGGAGAAGAGTTGCCAAGAACATATTGG…
Gohir.A01G024300	ghMGT01	ATGACGCACGTGGTGCCGGCGGACCCACAGGTGTTGGTGACGGTGAAGAAGAAGGCACAGCCGTCGCGAAGTTGGGCCGTTTTGGACAGCAATGGCGAAACCACCTTGTTGGACGTCGATAAGTACGCTATCATGCATCGAGTTAACATCCACGCCCGTGATTTACGCATCCTCGATCCCCTCTTGTCTTACCCTTCTACCATTCTTGGCCGTGATGGTGCTATTGTTTTAAATTTAGAGCATATCAAGGCAATTATTACGGCTGAGGAGGTATTGCTTCGAGATCCATCGGGTGAATATGTTATCCCTGTTGTTCAAGAACTTCAAAGGCATCTACCTGTAGTGAATGCCATTAATCAAGGTCCGGAAGCAATTGGCCATATTGATGCCGAAGCAGCT…
Gohir.A01G182300	ghMGT02	ATGGCGGTTGTCCAAAAGTGGAGGGAGGGCATGTCCTCGGATAATGTTAAGGGTTTGGTTTTAGCGCTTTCTTCGAGTTTATTTATTGGGGCAAGTTTCATTGTTAAGAAAAAAGGCTTGAAGAAAGCTGGTGCTTCTGGCATCAGGGCAGGGGTTGGAGGGTATTCTTACTTGCTTGAGCCTCTTTGGTGGGCAGGCATGATAACAATGGTCGTGGGTGAAATTGCTAATTTTGCAGCATATGCATTTGCACCAGCTATTCTGGTCACTCCTCTTGGTGCCCTCAGCATCATTATCAGTGCGGTACTTGCGCATATCATTTTGCGGGAAAGATTACATACTTTTGGGATTCTGGGTTGTATTTTATGTGTTGTGGGCTCTACAACAATTGTATTACAT…
Gohir.A02G019800	ghMGT03	ATGAAAGGAATGTCAATGGACAATATTCGTGGCCTCATTTTGGCTGTTTCATCGAGCGTTTTTATTGGATCTAGCTTTATTATCAAGAAACAGGGTCTTAAGAAAGCTGGATCATCAGGACCAAGAGCCGGGCAAGGAGGACACTCTTATTTGTATGAACCTTGGTGGTGGGCTGGAATGATAACCATGATAATCGGGGAGATAGCTAATTTCGCTGCTTATGCGTATGCTCCTGCAATTCTTGTAACACCATTGGGAGCCTTAAGTATTATTTTCAGTGCAGTGCTAGCACATTTTATTTTGAAAGAGAGATTACACATCTTTGGTATGCTTGGATGTGCTCTTTGCGTAGTTGGCTCTACAACCATTGTCTTACATGCTCCCAAGGAGAGACATATT…
Gohir.A03G203400	ghMGT04	ATGGGGTTGTCGGACAATTTGAAGGGAGTGATATTAGCAGTGGCGTCGAGCGCTTTTATTGGCTCAAGTTTTATTTTGAAGAAGAAAGGGCTCAAGCGTGGTGGTGCTTCGGGTATTCGCGCAGGAGTTGGAGGTTATACCTACTTACTAGAGCCACTTTGGTGGGCAGGCATGATAACAATGATCATGGGAGAGATTGCGAATTTCGTGGCTTATATCTATGCTCCTGCTGTTCTAGTGACGCCGCTTGGTGCTCTAAGTATAATTGTGAGTGCTTGCCTGGCACACTTTTTGTTGAACGAAAGAATTCAGAAAATGGGGATTGTAGGTTGTGTTTCCTGCATTGTTGGTTCGGTGGTGATTGTAATTCATGCACCGCAAGAGCATACCCCGAGTTCC…
Gohir.A03G214800	ghMGT05	ATGGCAGCTGTGCGAAGATGGAGCGAGGGAATGTCCTCAGATAATATTAAGGGTTTGGTTTTAGCCATTTCTTCCAGTTTATTTATTGGGGCAAGTTTCATTGTTAAGAAAAAAGGCTTGAAGAAAGCTGGTGCTTCTGGCGTCAGGGCAGGAGTTGGAGGGTATTCGTACTTGCTTGAGCCACTTTGGTGGATTGGCATGATAACAATGGTCGTGGGGGAAATTGCTAATTTTGCTGCTTATGCATTCGCACCAGCCATACTGGTCACTCCTCTTGGTGCACTCAGCATCATTATCAGTGCGGTACTTGCGCATATCATTTTGCGGGAAAAGTTACATACTTTTGGGATTCTTGGTTGTGCTTTGTGTGTTGTGGGCTCAACAACAATTGTGTTGCAT…
Gohir.A04G121700	ghMGT06	ATGAGATTCGACGCTATGGGGGTATCGGAGCTGGTGGAATATGATAAGAGTACGATAATTAAGAGGGCTTCGATTCCTGCTAGGGATTTGAGGATTCTTGGCCCTGTCTTCTCTCACTCATCAACGATTCTTGCCAGGGAGAAAGCCATGGTTGTGAATTTAGAGTTTATAAAGGCAATAGTTACGGCTGAAGAAGTTCTTATACTGGACCCTCTACAACAGGAGGTGCTTCAATTCGTGGATCAACTAAGACTACAACTTCCTCATAAAAGTGCAAATAAGACACAAGGAGCAGGCGCAGTGGATGTAAATGATAGTGAAACTCATGTTTCAACTGGCGGACAGTGGTTACCAGTTCCAGAAGCCATGGAGGGTTTGCAGTGTGAGCTTCCATTTGAG…
Gohir.A04G130300	ghMGT07	ATGGCAGCTGTGCGAAGGTGGAGTGAGGGCATGTCCTCAGATAATGTTAAGGGTTTGGTTTTAGCACTTTCTTCCAGTTTATTTATTGGAGCAAGTTTCATTGTTAAGAAAAAAGGCTTGAAGAAAGCTGGTGCTTCTGGTATCAGGGCAGGCAGTGGAGGTTATTCTTACTTGTTGGAGCCACTTTGGTGGGTGGGCATGATAACAATGGTTGTTGGGGAAATTGCTAATTTTGCAGCTTATGCGTTTGCACCTGCTATACTGGTTACTCCTCTTGGTGCCCTCAGTATAATTATCAGTGCGGCCCTAGCACATATAATTTTACGGGAAAAATTACATACTTTTGGGATTCTTGGTTGTGTTTTATGTGTCGTGGGATCTACAGCAATTGTTTTGCAT…
Gohir.A06G114600	ghMGT08	ATGGCAGACCTAAAAGAGCGTTTGCTTCCACCGAAACCTCAATCGGCTATCAACATTAGAGATGCTTCCTATCGGCCATCTGCCTCTGGACGCCAGCCTTTCCAAGGCATGGATTTATCGGGGTTAAAGAAGCGGGGCCAAGGACTCAGATCTTGGATCCGTGTTGATACATCTGGGAATTCGCAAATAATCGAGGTTGACAAGTTCACTATGATGCGTCGATGTGATCTACCAGCCCGAGACCTACGGCTTCTTGACCCATTGTTTGTTTACCCCTCGACAATCCTCGGTAGAGAGAAGGCTATTGTTGTAAATTTAGAGCAGATAAGGTGTATTATCACTGCCGACGAGGTTCTACTCTTGAATTCCCTTGATAGCTATGTTTTGCAGTATGTTGTG…
Gohir.A07G022000	ghMGT09	ATGTGGGAATCGATCTGTTTAACATTGGCCGCTACCGCTGGTAATAACATAGGCAAAGTTCTACAAAAGAAGGGCACCGGTATTCTCCCTCCTCTCTCCTTCAAGTTCAAGGTGATAAGAGCATATGCTGTTAATAAATCATGGCTGATTGGGTTTCTGATCGATATATCCGGTGCCTTGTTGATGCTGAGAGCTTTATCGTTGGCTCCGGTATCTATCATTCAACCAGTTTCTGGATGTGGACTTGCCATTCTTTCAATCTTTTCACACTTCTATCTACAAGAAGTCATGAATGTTATTGACTGGTTGGGGATTACATTAGCTGGCATTGGCACCATAGGAGTTGGTGCTGGTGGAGAGGAGCAAGTGGCTTCTTCAGTATCTATTTTACAGTTACCA…
Gohir.A07G121500	ghMGT10	ATGGGTATGTCTCAAGACAATCTAAGAGGGTTTATTTTGGCATTGTTGTCCAGTGTGTTTATTGGAGCAAGTTTTATCATTAAAAAGAAAGGTCTTAGAAGAGCTGCTGCTGTTTCTGGTGTTAGAGCTGGTTATGGTGGATATGCATATCTTTTGGAGCCTTTATGGTGGTTGGGCATGGTCACAATGATTGTTGGAGAGGTTGCAAACTTTGTTGCTTATGCATTTGCTCCAGCAATTCTTGTTACTCCTCTTGGTGCATTAAGCATTATTGTAAGTGCTATCTTGGCTCACTTCATGTTGAAGGAGAAGTTACATCAGCTAGGGGTTTTAGGTTGCATTATGTGTATCTCAGGTTCAGTCATAATAGTTATCCACGCACCACAAGAGAGCCCTATC…
Gohir.A07G209600	ghMGT11	ATGACTCGACAGGTGTATTTTGTTCCGGCGGCGGAGACGCAAGTAGCTTCGGTGAAGAAGAAAACGGCGGTTACGACGAGCTGGGTTTCGGTAGATGCAAAGGGGCAAGGCACGGTTCTTGACGTCGACAAGTACGCTATAATGCGCCGCGTTCAGATCCATGCTAGAGATCTTCGTGTTCTTGATCCTATGTTATCCTATCCTTCCACCGTTTTGGGCAGAGAAAAAGTCATTGTTCTCAATTTAGAGCACATTAAAGCTATAATAACAGCAGAAGAGGTCTTGCTTAGAGATCCATTTGATGATAACGTAATACCTATTGTTGCCGAACTTAAAAGGCGATTGCCTCAAGAAAAAGATCTCACATGTCAAGGCCTAGGAGAAGAAGAAGAAGAACAT…
Gohir.A08G061600	ghMGT12	ATGGCTCGAGAAGCGTATTTGGTTCCTGTCGTGGAGGCGCAAGTAGCCACGCTGAAGAAGAAAACGGCGGTGACAACGAGCTGGATTTCGATAGACGCTAAGGGGCAAAGCGTGATTCTTGACGTCGACAAGTATGCTATAATGCGCCGCGTTCAGGTTCATGCTAGAGACCTTCGTATTCTTGATCCCATGCTATCTTATCCTTCCACCATTTTAGGCAGAGAGAAAGTCATTGTTCTCAATTTAGAGCACATTAAAGCTATAATCACAGCAGAAGAGGTGTTGCTTAGAGATCCATACGATGATAACGTAATACCCATTGTCGCTGAACTTAAAAGGCGATTGCCTCAAGATAACCTCACATGTCAAGATCAAGGAGAAGAAGAAGAAGAACACCCT…
Gohir.A09G086400	ghMGT13	ATGGCGTCAACTCCCACTCCTCCTCCTTCCTCTTATCCAAATACACTCCAATTTTCTGTTAAATCTCCGTCTCCGTTCGTACATTATCTTCTCTTCCGCTCTCGATGGCGAAATGATTCTACGATTTCGCTTCAAAAGAGCGGAGTTCCTCCACTTCCGCCTCTAGTGAGACCGTCTTTTAAGAAGAAGTTCAAGTGCTTCGCTAGATCATCGTCAACGGAGGAAGATCGTTTGAGAGAATCGGAAACATTGGCCGGTGATAATGATGGTGATGATGATGGAGGGAGGGAAGATACGAAGGTGCAGCAACGGCAGAGTGATTCCTTCTTGCTTGGAATTCATGAACCTGTTTATGAGGTGGTAGAGGTGAAGTCAAGTGGAGTATCATCTAAAAGGAAG…
Gohir.A10G123900	ghMGT14	ATGGTGCACGTGGTGCCGGCGGACCCTCAGGCGGTAGTAGCGGTGAAGAAGAAGGCGCAGTCTTCTCGAAGTTGGGTCCTTCTTGATAGCACGGGGGAGACTACCGTGCTTGACGTCGACAAATATGCTATCATGCATCGAGTAAACATTCATGCCCGAGATTTACGCATACTCGACCCTCTCTTGTCTTATCCTTCCACCATTCTCGGTCGTGATGGAGCTATTGTCTTAAATTTAGAGCATATCAAGGCAATTATTACTTCTGAGGAGGTTTTGCTTCGAGATCCATCTGATGAAAATGTTGTCCCTGTTGTTGAAGAACTTAAGAGACGTTTGCCTCCAGTGAATGCCATTCAGCAAGGTCAGGACTACACTGGTGGACAAAATGATGTTGAGGGT…
Gohir.A11G059200	ghMGT15	ATGCCTTTTGTGCATAGTAGGTTCGACAATCATTGTGCTTCATGCTCCGAGGAGCGTTCTATTAGCTCAGTTGAAGAAATTTGGGAATTTGCTACTCAACCAGCCTTTCTTTTGTATACAGCTTCAGCAATAGCTACTGCGTTGGTACTAATTTTGTATTGTGCACCTCGTTATGGTCAAACTAACATAATCGTGTATATTGGAATATGCTCAGTAATTGGATCATTGACGGTAATGAGCATAAAAGCAATTGGTATTGCAATAAAGCTAACATTGGAGGGCACAAATCAGGCCAAATACTTCCAGACTTGGATCTTTGCAATGGTTGCAATTACCTGTATCATTATTCAATTAAATTATCTAAATATGGCATTGGATACTTTCAACACGGCAATTGTT…
Gohir.A11G061900	ghMGT16	ATGGGAGATTGGGTCATTGGAGCATTCATCAACCTCTTTGGCAGTATTGCCATCAACTTTGGGACAAACCTTCTTAAATTAGGTCATAATGAGAGGGAAAGACATTCCATGATGGATGGTGAAGGAATGGCTGGAAAGGTTCCATTAAAGCCTATCATATACTTCCAAACATGGAGAGTTGGTATTCTATTTTTCATTATTGGAAATTGTCTAAACTTCATTTCCTTTGGTTATGCTGCTCAGTCACTTCTTGCAGCCTTGGGATCTGTTCAGTTTATATCCAACATTGCATTTGCTTACTTCGTCTTAAACAAAATGGTCACTGTAAAGGTACTAGCAGCCACTGCATTTATTGTTCTTGGAAATTTTTTTCTTGTCGCATTCGGCAACCATCAGTCT…
Gohir.A12G038900	ghMGT17	ATGGGATTTTCCGATAATTCCAAGGGATTGATATTAGCAATGGCGTCTAGCGCGTTTATTGGGTCCAGTTTTATTTTGAAGAAGAAAGGGCTCAAGCGTGCTGGGGCTTCGGGTACTCGCGCAGGCGTTGGCGGTTATACCTACTTACTCGAGCCACTGTGGTGGGCTGGCATGATAACTATGATTGTTGGGGAGGTTGCAAATTTCGTGGCTTATGTGTACGCTCCTGCAGTTCTAGTTACCCCTCTTGGGGCACTAAGTATAATTGTGAGTGCTTGTCTGGCACACTTTATGTTGAAGGAAAGAATTCAGAAAATGGGGATTTTAGGATGTATTACCTGCATTGCAGGTTCAGTGGTGATTGTAATTCATGCACCACAAGAGCATACCCCAAGTTCT…
Gohir.A12G161100	ghMGT18	ATGGAAGAATCACAGGGGGATTTTCTTCCATCTGACGTTCCTGAATCTACATCTTCCAATAACTGTGAAAGGAATACTTCAAGTGCACATTCGAATCGTTGGTCTGGCTTTCCAGGTGTGAAGAAGAGAGGACACAGCAGTCGCTCATGGATAAAGATTGACCAAGACGGGAATGTGAAGATTTTGGAACTTGATAAAGCTAAAATAATGAGACAGTGTTCTTTGCCATCCAGGGACCTAAGGCTTTTGGACCCTTTGTTTATTTATCCTTCAACAATACTAGGAAGGGAGAAGGCTATTGTGGTCAGTCTTGAGCAAATAAGATGCATAATCACAGCTGAGGAGGTTATCTTGATGAACTCTTTGGACATAAATGTTGTCCAATATAAGTCTGAATTA…
Gohir.A13G047400	ghMGT19	ATGACGGCAACGGGAACTCCACCCCCACCACCGTCGTCCAAACCCGAAGACGACCCGAACCTATCAAACCGGTCCGCCGTGATCCCGAACCAAACTCTCCCCTTCACCACACATCGGAAAAAGGGGACCAGTATCCGCTCATGGCTTTTACTTGACTCGACGGCCCACACCTTTAGGTTGGAGGCCGGCAAGCATTCTATCATGAGACGAACGGGTTTACCCGGTCGAGATCTTCGGATCCTGGACCCGCTTCTTTCTTACCCGTCGACGGTTCTGGGCATCATTACGGCTCAAGAGGTTTTGCTGTTGAATTCCAAGGATCCTTCCGTTACACCGTTTGTTGATGAGTTGCAGAGGCGGATTTTGTTGCATTATCAAGCAAACCAATCCAAGGAGGGT…
Gohir.A13G223600	ghMGT20	ATGGCGCTAACTCCTCCTCCTTCGCCAAATCTTCTCCAAGTCTCAGTTAAATCTTCATCATCTCCTTGTCTATCACCGTCCGTACATTACCTTCTCTTCGGTTCTCCATGCGCCAACGCTTCCCCGTTTCTGCTTCAAAAGAGCGGGCTTCCGCTGCTTCCCGTGGCGGTGAAACCTTCTTCTTTGGAGCGGAGGATCAAGTGCTTCACTACAAGATCGTACACGAAAGAAGACCGTTTGAACGAGCCGGAAACATTTTCCGCCGAGGATGTCGCCGGTGGCGGTGATGAAGATGGAGGGAGTGAAGATCTGGACTTGCAGCAAAACCGTGGCTCTGCGGTTGCCTCGCCGAGGATTGCTTCGTCTTCCAGTGATTCACTCTCGCTTGGAATTCGCGAG…
Gohir.D01G008900	ghMGT21	ATGGTGGAAGCCGGAAAACATGCTATCATGAGACGTACGGGTTTGCCCGCTCGAGATCTTCGGATCTTGGACCCGCTGTTGTCGTACCCATCCACGATTCTTGGTCGAGAAAGGGCGATCGTGATTAATTTGGAGCATATCAAGGCAATCATCACGGCTCAAGAGGTTTTGCTTTTAAATTCCAAGGATCCTTCAGTTACGCCCTTTGTTGATGAGATACAGAGCCGAATTTTGTGCCATTATCAAGCTACTAAAGACCAGGAAGGTGGTGTTGACGATTCCAGCTACATAATTCGATCGAGTTCTCAAAATTTGTCATCAAGGTTTTCACAGAGTCAAACTCAGGATGATGAAGGTAAATTAGAAGAGAAACAGAGTCTTGAAAACCCAAATGGCTCG…
Gohir.D01G022300	ghMGT22	ATGACGCACGTGGTGCCGGCGGACCCACAGGTGTTGGTGACGGTGAAGAAGAAGGCACAGCCGTCGCGAAGTTGGGCCGTTTTGGACAGCAATGGCGAAACCACCTTGTTGGACGTCGATAAGTACGCTATCATGCATCGAGTTAACATCCACGCCCGTGATTTACGCATCCTCGATCCTCTCTTGTCTTACCCTTCTACCATTCTTGGCCGTGATGGTGCTATTGTTTTAAATTTAGAGCAGCATATCAAGGCAATTATTACTGCTGAGGAGGTATTGCTTCGAGATCCATCGGGTGAATATGTTGTCCCTGTTGTTCAAGAACTTCAAAGGCATCTACCTGTAGTGAATGCCATTAATCAAGGTCCGGAAGCAATTGGCCAAATTGATGTCGAAGCA…
Gohir.D01G173400	ghMGT23	ATGGCGGTTGTCCAAAAGTGGAGGGAGGGCATGTCCTCGGATAATGTTAAGGGTTTGGTTTTAGCGCTTTCTTCGAGTTTATTTATTGGGGCAAGTTTCATTGTTAAGAAAAAAGGCTTGAAGAAAGCTGGTGCTTCTGGCATCAGGGCAGGGGTTGGAGGGTATTCTTACTTGCTTGAGCCTCTTTGGTGGGCAGGCATGATAACAATGGTCGTGGGTGAAATTGCTAATTTTGCAGCATATGCATTTGCCCCAGCTATTCTGGTCACTCCTCTTGGTGCCCTCAGCATCATTATCAGTGCGGTACTTGCGCATATCATTTTGCGGGAAAGATTACATACTTTTGGGATTCTTGGTTGTATTTTGTGTGTTGTGGGCTCTACAACAATTGTATTACAT…
Gohir.D02G023100	ghMGT24	ATGAACGGAATGTCAATGGACAATTTTCGTGGCCTCATTTTGGCTGTTTCATCGAGCGTTTTTATTGGATCTAGCTTTATTATCAAGAAACAGGGTCTTAAGAAAGCTGGAGCATCGGGACCAAGAGCCGGGCAAGGAGGACACTCTTATTTGTATGAACCTTGGTGGTGGGCTGGAATGATAACCATGATAATCGGGGAGATAGCTAATTTCGCTGCTTATGCGTATGCTCCTGCAATTCTTGTAACACCATTGGGAGCCTTAAGTATTATTTTCAGTGCAGTGCTAGCACATTTTATTTTGAAAGAGAGATTACACATCTTTGGTATGCTTGGATGTGCTCTTTGCGTAGTTGGCTCTACAACCATTGTCTTACATGCTCCCAAGGAGAGACATATT…
Gohir.D02G224700	ghMGT25	ATGGGGTTGTCCGACAATTTGAAGGGAGTGATATTAGCAGTGGCGTCGAGCGCTTTTATTGGCTCAAGTTTTATTTTGAAGAAGAAAGGGCTCAAGCGTGGTGGTGCTTCGGGTATTCGCGCAGGAGTTGGAGGTTATACCTACTTACTAGAGCCACTTTGGTGGGCAGGCATGATAACAATGATCATGGGAGAGATTGCGAATTTCGTGGCTTATATCTATGCTCCTGCTGTTCTAGTTACCCCGCTTGGTGCTCTAAGTATAATTGTGAGTGCTTGCCTGGCACACTTTTTGTTGAACGAACGAATTCAGAAAATGGGGATTGTAGGTTGTGTTTCCTGCATTGTTGCTTTTCTGGTTTATGTAGTAGCTACACTTTCAGCAGTTTTAGCTTTGGTT…
Gohir.D02G236300	ghMGT26	ATGGCAGCTGTGCGAAGATGGAGCGAGGGAATGTCCTCAGATAATATTAAGGGTTTGGTTTTAGCCATTTCTTCCAGTTTATTTATTGGGGCAAGTTTCATTGTTAAGAAAAAAGGCTTGAAGAAAGCTGGTGCTTCTGGCGTCAGGGCAGGAGTTGGAGGGTATTCGTACTTGCTTGAGCCACTTTGGTGGTTTGGCATGATAACAATGGTCGTGGGGGAAATTGCTAATTTTGCTGCTTATGCATTCGCACCAGCCATCCTGGTCACTCCTCTTGGTGCACTCAGCATCATTATCAGTGCGGTACTTGCGCATATCATTTTGCGGGAAAAGTTACATACTTTTGGGATTCTTGGTTGTGCTTTGTGTGTTGTGGGCTCAACAACAATTGTGTTGCAT…
Gohir.D04G163500	ghMGT27	ATGGGAAAAGGCCCCTTCTCGTTCCGGCGCCCTTCTATTAGGCGCCGCCGTCCGAAATCTACGGCGGTACCTCAATCGCCAAAGCCGATACCGACTGCTGGGGCCGTCGCTTCTTCATCTTCGCCTCCGCCTCCTAGCACTGGTAACTTGATTGGTGGAGGAGGTGGTGGTGGTGGGGTGGTGGCGGCGGGGAAGGGGAAGAAGAAGGCGGCGGGAGCAAGGCTGTGGATGAGATTCGACGCGATGGGGGTATCGGAGCTGGTGGAATATGATAAGAGTACGATAATTAAGAGGGCTTCGATTCCTGCTAGGGATTTGAGGATTCTTGGCCCTGTCTTCTCTCACTCATCAACGATTCTTGCCAGGGAGAAAGCCTTGGTTGTGAATTTAGAGTTTATA…
Gohir.D04G175500	ghMGT28	ATGGCAGCTGTGCGAAGATGGAGTGAGGGCATGGCCTCAGATAATGTTAAGGGTTTGGTTTTAGCACTTTCTTCCAGTTTATTTATTGGAGCAAGTTTCATTGTTAAGAAAAAAGGCTTGAAGAAAGCTGGTGCTTCTGGTATCAGGGCAGGCAGTGGAGGTTATTCTTACTTGTTGGAGCCACTTTGGTGGGTAGGCATGATAACAATGGTTGTTGGGGAAATTGCTAATTTTGCAGCTTATGCATTTGCACCTGCTATACTGGTTACTCCTCTTGGCGCCCTCAGTATAATTATCAGTGCGGCCCTAGCACATATAATTTTACGGGAAAAATTACATACTTTTGGGATTCTTGGTTGTGTTTTATGTGTCGTGGGATCTACAGCAATCGTTTTGCAT…
Gohir.D06G119200	ghMGT29	ATGGCAGACCTAAAAGAGCGTTTGCTTCCACCGAAACCTCAATCGGCTATAAACATTAGAGATGCTTCCTATCGGCCATCTGCCTCTGGACGCCAGCCTTTCCAAGGCATGGATTTATCAGGGTTAAAGAAGCGGGGCCAAGGACTCAGATCTTGGATCCGTGTTGATACATCTGGGAATTCACAAATAATCGAGGTTGACAAGTTCACTATGATGCGTAGATGTGATCTACCAGCCCGAGACCTACGGCTTCTTGACCCTTTGTTTGTTTACCCCTCGACAATCCTCGGTAGAGAGAAGGCTATTGTTGTAAATTTAGAGCAGATAAGGTGTATTATCACTGCCGACGAGGTTCTACTCTTGAATTCCCTTGATAGCTATGTTTTGCAGTATGTTGTG…
Gohir.D07G021900	ghMGT30	ATGTGGGAATCGATCTGTTTAACATTGGCCGCTACCGCTGGTAATAACATAGGCAAAGTTCTACAAAAGAAGGGCACCGGTATTCTCCCTCCTCTCTCCTTCAAGTTCAAGGTGATAAGAGCATATGCTGTTAATAAATCATGGCTGGTTGGGTTTCTGATCGATATATCCGGTGCCTTGTTGATGCTGAGAGCTTTATCGTTGGCTCCGGTATCTGTCATTCAACCAGTTTCTGGCTGTGGACTTGCCATTCTTTCAATCTTTTCACACTTCTATCTACAAGAAGTCATGAATGTTATTGACTGGTTGGGGATTACATTAGCTGGCATTGGCACCATAGGAGTTGGTGCTGGTGGAGAGGAGCAAGTGGCTTCTTCAGTATCTATTTTACAGTTACCA…
Gohir.D07G125800	ghMGT31	ATGGGTATGTCTCAAGACAATCTAAGAGGGTTTATTTTGGCATTGTTGTCCAGTGGGTTTATTGGAGCAAGTTTTATCATTAAAAAGAAAGGTCTTAGAAGAGCTGCTGCTGTTTCTGGTGTTAGAGCTGGTTATGGTGGATATGCATATCTTTTGGAGCCTTTATGGTGGTTGGGCATGGTCACAATGATTGTTGGAGAGGTTGCAAACTTTGTCGCTTATGCATTTGCTCCAGCAATTCTTGTTACTCCTCTTGGTGCATTAAGCATTATTGTAAGTGCTGTCTTGGCTCACTTCATGTTGAAGGAGAAGTTACATCAGCTAGGGGTTTTAGGATGCGTTATGTGTATCTCAGGTTCGGTCATAATAGTTATCCACGCACCACAAGAGAGCCCTATC…
Gohir.D07G215700	ghMGT32	ATGACTCGACAGGTGTATTTTGTTCCGGCGGCGGAGACGCAAGTAGCTTCGGTGAAGAAGAAAACGGCGGTTACGACGAGCTGGGTTTCGGTAGATGCAAAGGGGCAAGGCACGGTTCTTGACGTCGACAAGTACGCTATAATGCGCCGCGTTCAGATCCATGCTAGAGATCTTCGTGTTCTTGATCCTATGTTATCCTATCCTTCCACCGTTTTGGGCAGAGAAAAAGTCATTGTTCTCAATTTAGAGCACATTAAAGCTATAATAACAGCAGAAGAGGTGTTGCTTAGAGATCCATTTGATGATAACGTAATACCTATTGTTGCCGAACTTAAAAGGCGATTGCCTCAAGAAAAAAATCTCACATGTCAAGGCCTAGGAGAAGAAGAAGAAGAACAT…
Gohir.D08G070700	ghMGT33	ATGGCTCGAGAAGCTTATTTGGTTCCTGTCCTGGAGGCACAAGTAGCCACGCTGAAGAAGAAAACGGCGGTGACAACGAGCTGGATTTCGATAGACGCTAAGGGGAAAAGCGTGATTCTTGACGTCGACAAGTATGCTATAATGCGCCGCGTTCAGGTTCATGCTAGAGACCTTCGTATTCTTGATCCCATGCTATCTTATCCTTCCACCATTTTAGGCAGAGAGAAAGTCATTGTTCTCAATTTAGAGCACATTAAAGCTATAATCACAGCAGAAGAGGTGTTGCTTAGAGATCCATACGATGATAACGTAATACCCATTGTCGCTGAACTTAAAAGGCGATTGCCTCAAGATAATCTCACATGTCAAGATCAAGGAGAAGAAGAAGAAGAACACCCT…
Gohir.D09G090700	ghMGT34	ATGGCGGACCTAAAAGAACGTCTGCTCCCACTGAAACCTCAATCGGCTATAAATCTTAGAGGCACTACATCTCAGGCATCTGCCTCTGGACGCCAACCTTTCCAAGGCTTGGATTTATCTGGTTTAAAGAAGCGGGGCCAAGGACTCCGATCTTGGATCCGTGTTGATACATCTGGGACTTCCCAAGTCATCGAGGTTGACAAGTTCACCATGATGCGTCGTTGTGATCTACCAGCCCGGGATTTACGGCTTCTTGATCCTTTGTTTGTGTACCCCTCCACAATCCTTGGCAGAGAGAAGGCGATTGTTGTAAATTTAGAGCAGATACGATGTATCATCACTGCTGATGAAGTTTTGCTCTTGAATTCCCTTGATAGCTATGTTTTGCAGTATGTTGTA…
Gohir.D10G152400	ghMGT35	ATGGTGCACGTGGTGCCGGCGGACCCTCAGGCGGTAGTGGCGGTGAAGAAGAAGGCGCAGTCTTCTCGAAGTTGGGTCCTTCTTGATAGCACGGGGGAGACTACCGTGCTTGACGTCGACAAGTATGCTATCATGCATCGAGTAAACATTCATGCCCGAGATTTACGCATACTCGACCCTCTCTTGTCTTACCCTTCCACCATTCTCGGTCGCGATGGAGCTATTGTCTTAAATTTAGAGCATATCAAGGCAATTATTACTTCTGAGGAGGTTTTGCTTCGAGATCCATCTGATGAAAATGTTGTCCCTGTTGTTGAAGAACTTAAGAGACGTTTGCCTCCAGTGAATGCTATTCAGCAAGGTCAGGACTACACTGGTGGACAAAATGATGTTGAGGGT…
Gohir.D11G063300	ghMGT36	ATGTACTCCAGCAATCTCAAGGGCTTTATTCTGGCGATGGTCTCTAGCGCCTTCATTGGCTCCAGCTTTATCATCAAGAAAAAGGGTCTCCGAAAGGCCGGTGTCAACGGCCCCCGTGCTAGTTCTGGTGGATATGGCTACTTGTTGGAGCCGCTCTGGTGGGTTGGCATGCTTACTATGATTATCGGGGAGATTTCCAATTTCGTTGCTTATATCTATGCACCTGCTGTTTTGGTAACGCCTCTTGGTGCTTTGAGTATCATCGTTAGTGCTGTTTTAGCACATTTCATGTTAAAGGAGAAACTGCAGAAAATGGGAATGTTGGGATGCCTTTTGTGCATAGTAGGTTCGACAATCATTGTGCTTCATGCTCCTGAGGAGCGTTCTATTAGCTCAGTT…
Gohir.D11G065800	ghMGT37	ATGGGAGATTGGGTCATTGGAGCATTCATCAACCTCTTTGGCAGTATTGCCATCAACTTTGGGACAAACCTTCTTAAATTAGGTCATAATGAGAGGGAAAGACATTCCATGATGGATGGTGAAGGAATGGCTGGAAAGGTTCCATTAAAGCCTATCATATACTTCCAAACATGGAGAGTTGGTATTCTATTTTTCATTATTGGAAATTGTCTAAACTTCATTTCCTTTGGTTATGCTGCTCAGTCACTTCTTGCAGCCTTGGGATCTGTTCAGTTTATATCCAACATTGCATTTGCTTACTTCGTCTTAAACAAAATGGTCACTGTAAAGGTACTGGCAGCCACTGCATTTATTGTTCTTGGAAATTTTTTTCTTGTCGCATTCGGCAACCATCAGTCT…
Gohir.D12G033500	ghMGT38	ATGGGATTGTCGGATAATTCCAAGGGATTGATATTAGCAATGGCGTCTAGCGCGTTTATTGGGTCCAGTTTTATTTTGAAGAAGAAAGGGCTCAAGCGTGCTGGGGCTTCGGGTACTCGCGCAGGCGTTGGCGGTTATACCTACTTACTCGAGCCACTGTGGTGGGCCGGCATGATAACAATGATTGTCGGGGAGGTTGCAAATTTTGTGGCTTATGTGTACGCTCCTGCAGTTCTAGTTACCCCTCTTGGGGCACTAAGTATAATTGTGAGTGCTTGTCTGGCACACTTTATGTTGAAGGAAAGAATTCAGAAAATGGGGATTGTAGGATGTATTACCTGCATTGCAGGTTCAGTGGTAATTGTAATTCATGCACCACAAGAGCATACCCCAAGTTCT…
Gohir.D12G164400	ghMGT39	ATGGAAGAATCACAGGGGGATTTTCTTCCATCTGACGTTCCTGAATCTACATCTTCCAATAACTGTGAAAGGAATACTTCAAGTGCACATTCAAATCGTAGGTCTGGCTTTCCAGGTGTGAAGAAGAGAGGACACAGCAGTCGCTCATGGATAAAGATTGACCAAGATGGGAATGTGAAGATTTTGGAACTTGATAAAGCTAAAATAATGAGACAGTGTTCTTTGCCATCCAGGGACCTAAGGCTTTTGGACCCTTTGTTTATTTATCCTTCAACAATATTAGGAAGGGAGAAGGCTATTGTGGTCAGTCTTGAGCAAATAAGATGCATAATCACAGCTGAGGAGGTTATCTTGATGAACTCTTTGGACATAAATGTTGTCCAATATAAGTCTGAATTA…
Gohir.D13G045700	ghMGT40	ATGACGGCAACGGGAACTCCACCCCCACCCCCGTCGTCCAAACCCGAAGACGACCCGGACCTATCAAACCGGTCCGCCGTGATCCCGAACCAAACTCTCCCCTTCACCACTCATCGGAAAAAAGGGACCAGTATCCGATCATGGCTTTTACTTGACTCGACGGCCCACACCTTTAGGTTGGAGGCCGGAAAGCATTCTATCATGAGACGCACGGGTTTACCCGGTCGAGATCTTCGGATCTTGGACCCGCTTCTTTCGTACCCGTCGACGGTTCTGGGTCGAGAACGGGCCATTGTGATTAACTTGGAGCACATAAAGGCAATCATTACGGCTCAAGAGGTTTTGCTGTTGAATTCCAAGGATCCTTCCGTTACACCGTTTGTTGATGAGTTGCAGAGG…
Gohir.D13G228400	ghMGT41	ATGGCGCTAACTCCTCCTCCTTCGCCAAATCTTCTCCAAGTCTCAGTTAAATCTTCATCATCTCCTTGTCTATCACCGTCCGTACATTACCTTCTATTCGGTTCTCCATGCTCCAATGCTTCCCCGTTTCTGCTTCAAAAGAGCGGGCTTCCGCTGCTTCCCGTGGCGGTGAAACCTTCTTCTTTGGAGCGGAAGATCAAGTGCTTCATTACAAGATCGTACACGAAAGAAGACCGTTTGAACGAGCCGGAAACATTTTCCGCCGAGGATGTCGCCGGCGGCGATGATGAAGATGGAGGGAGTGAAGATCTGGACTTGCAGCAAAACCGTGGTTCTGTGGTTGCCTCGCCGAGGATTGCTTCGTCTTCCAGTGATTCACTCTCGCTTGGAATTCGCGAG…
Tc01v2_t013790	tcMGT01	ATGAATACACCGGGTAATGATTATTACGCTTCCGAGAGCAATGAAAGGAAGAAACACCATCATCCTAAAAATCATCCCAGTCGAAACAATGGAATAGGAGGTGATCTTTGGACTGATGGACTTATTTGTGCTTTTGAATATGTTCATGGCCAACCTAAAGCAGTTCAGCAAAGTTCTGGTGCAAAGATCTGGTCTAAACAATATGCTTCAAAAGATGCATCTAGGAAGCAGATTTACGCATATGAACCGGCAAATTCTTTGACCGAAAGTGTTACTTCCAACAATTTAGCTAAATCTGCACCCTTAACAGAGTCCGCACTCACAGCTAAAGATAATGAAAAAAACTGTAGCAGGAATCTCAATCCTGGGGAAGAGGTCCCAAGAACTTATTGGAAACCA…
Tc01v2_t019400	tcMGT02	ATGTATGCATGTAGATATGTATGTATAGATGTACTCCAGCAATCTCAAGGGTTTTATTCTGGCGGTGGTCTCGAGCGCCTTCATTGGCTCCAGCTTTATCATCAAGAAAAAGGGTCTTCGAAAGGCCGGGGTCAACGGCCCCCGTGCCGGTTCTGGCGGATATGGCTACTTGTTGGAGCCACTCTGGTGGGTTGGCATGATTACTATTTTAATATGACAGTGATAGTTGGGGAGATTGCCAATTTCGTTGCATATATCTATGCACCTGCTGTTTTGGTAACGCCTCTTGGTGCATTGAGTATCATTGTTAGTGCCATTTTAGCGCATTTCATTTTAAAGGAGAAACTGCAGAAAATGGGAATGTTAGGATGTCTTTTGTGCATAGTAGGTTCCACAGTG…
Tc01v2_t022150	tcMGT03	ATGGCTCGAGAAGTGTATTTGGTTCCAGTGGAGACGCAAGTAGCTTCGCTTAAGAAGAAAACGGCGGTTACAACGAGCTGGATTTCAATAGACGCCAAGGGGCAAGGTGTGATTCTTGACGTCGACAAGTATGCTGTAATGCGCCGCGTTCAGATTCATGCCAGAGATCTTCGTATTCTTGATCCCATGTTGTCTTATCCTTCCACCATTTTAGGCAGAGAAAAACACATCAAAGCAATAATCACAGCAGAAGAGGTATTGCTTAGAGATCCATTTGATGATAATGTAATCCCCATTGTTGCGGAACTTAAAAGGCGATTGCCTCAAGATAATCTCACATGCCAAGGCCAAGGAGAAGAAGAAGAACACCTTGGTCTGCGCAATGACATGGACATTGGG…
Tc02v2_t001960	tcMGT04	ATGGCGGCTGCGCGGAGCTGGAGCGAAGGCATGTCCTCGGATAATGTTAAGGGCTTGGTTTTAGCGCTTTCTTCCAGTTTTTTTATTGGGGGAAGTTTCATTGTTAAGAAAAAGGGCTTGAAGAAAGCCGGTGCTTCTGGCATCAGGGCAGGAGTTGGAGGGTATTCTTACTTGCTTGAGCCACTTTGGTGGGCCGGCATGATAACAATGGTCGTGGGGGAAATTGCTAATTTTGCAGCTTATGCATTTGCACCAGCTATATTGGTCACTCCTCTTGGTGCTCTCAGCATCATTATCAGTGCTGCACTTGCGCATATAATTTTACGGGAAAAGTTACATACTTTTGGAATTCTTGGTTGTGTTTTGTGTGTGGTGGGCTCTACAACAATTGTTTTGCAT…
Tc02v2_t005250	tcMGT05	ATGGGATTGTCGGACAATTCGAAGGGAGTGATATTAGCAGTGGCGTCAAGCGCGTTTATCGGGTCAAGTTTTATTCTGAAGAAGAAAGGACTCAAGCGTGCTGGTGCTACGGGTACTCGCGCAGGAGTTGGAGGTTATACCTACTTATTAGAGCCACTTTGGTGGGCGGGCATGATAACAATGATTATTGGAGAGGTTGCAAATTTTGTGGCTTATGTATATGCTCCTGCTGTTCTAGTTACCCCACTTGGTGCACTAAGTATAATTGTGAGTGCTTTTCTGGCACACTTTATGTTGAAGGAACGAGTTCAGAAAATGGGTATTGTAGGATGTGTCTCCTGCATTGTAGGTTCAGTGGTGATTGTAATCCATGCACCACAGGAGCATACTCCAAGTTCT…
Tc02v2_t007390	tcMGT06	ATGGGCAAAGGCCCCTTCTCATTCCGCCGCTCCTCCACTCGGCGACGGCGTCCGAAATCCACTACGGTCCCACAACCGCCGACGCCGACGCCCCCGCCGCCGCCCGCTGGAGCCGCTTCTTCATCTTCACCTCCGCCTCCGAGCGCAGGTAATTTGATTGGCGGTGGCGGTGGTGGTGGTGCGGTGGGAGCGGCGGGGAAGGGGAAGAAGAAGGCGGCGGGGGCAAAGCTATGGATGAGATTTGATACGATGGGGATTTCGGAGTTGGTGGAATACGATAAGAGTACGATAATTGAAAGAGCTTCGATTCCTGCTAGGGATTTGAGGATTCTTGGCCCTGTCTTCTCTCACTCCTCCACTATTCTTGCCAGGGAGAAAGCTATGGTTGTCAATTTAGAG…
Tc02v2_t009780	tcMGT07	ATGAGATCTCAACCTCCACCGCCTCCGCCCAAACCCGAGGACGATCCGGATCTTTTAATTCGGGCCACTCCAACCTCGAATCAACCTCTCACCACATCCGTTGCGGGGCATCGGAAAAAAGGGACCGGTGTCCGGGCATGGCTTTTACTGGACTCAACGGGACAGACCCAAGTGGTGGAGGCGGGAAAGCATGCTATCATGAAACGCACGGGTTTACCCGCTCGAGATCTTCGGATCTTGGACCCACTTCTGTCGTACCCGTCGACGATTCTGGGTCGAGAAAGGGCGATCGTGATTAACTTGGAGCACATAAAGGCAATCATCACGGCCCAAGAGGTTTTACTGTTGAATTCTAAGGATCCTTCGGTTACGCCTTTCGTTGATGAGCTACAAAGCCGG…
Tc02v2_t010340	tcMGT08	ATGGATTTAGGTCAGGAAGAACTGGCTGGAGATGGAGAAATGGAGGAATTGGTTAGAGCATCCTCTGCTGATAATCCTCTCAGGGAAAATCATCTTCAGAGAACACATTTTCCTGGTATGGTGAGACAGAAAGCATATATTTTTGACGGTCTTGGAAATTATTATAATAAGGAGTGGGATCTTGCTGAAGGTGGTGGCAAGGAGTTTTGTTGGTACCATGTAGAACTTCCAAAAGGGAATCAGAAACTCTCTCAATCTGCACAATACCTCATAGATGTTCTTTGCCCACCTTTAAAGCTTCAAGACATTCTCTCACTTGTTAGCAATGGGCCATTTTGTGGACATGTTGATGGAGCGCTTGTCTTTAGGGTTAATTCACCTGGCCCTCCCTCCAGTAAT…
Tc02v2_t028490	tcMGT09	ATGGAAGAATCACAGGGCCATTTTCTTCCCTCTGATATTCCTGAATCTACCTCTTCCTATAACAGTGAAAGGCTTAATTCGGGTGCACATGCAAATTGTGGTTCTGGGTTTCCGGGGGTGAAGAAGAGAGGTCACAGCAGCCGTTCATGGATAAAGATTGATCAAGATGGCAATGTGAAGATTTTGGAGCTTGATAAGGCTAGAATAATGAGACATTGTTCTTTGCCATCCAGGGACCTCAGGCTTTTGGACCCTTTGTTTATTTATCCTTCAACGATACTAGGAAGGGAGAAGGCTATTGTGGTTAGTCTTGAGCAAATAAGATGTATAATCACAGCCGAGGAGGTTTTCTTGATGAATTCTTTGGAGAAAAATGTTGTTCAATACAAGTCAGAATTA…
Tc04v2_t004370	tcMGT10	ATGGGAGAGTGGGTCATTGGAGCATTCATCAACCTCTTTGGCAGCATTGCCATCAACTTCGGGACAAACCTTCTTAAATTAGGTCACAATGAGAGAGAAAGACATTCTACAATGGATGGTGGAGGAAAGACCCCTTTGAAGCCTATCATATACTTCCAAACTTGGAGAGTTGGTATTCTCTTTTTCGTTCTTGGAAATTGCCTAAACTTCATTTCCTTTGGTTATGCCGCTCAGTCACTTCTTGCAGCCTTGGGATCTGTTCAGTTTGTATCCAACATTGCATTTGCCTTCTTCGTGTTAAACAAAATGGTTACCGTAAAGGTACTAGTTGCCACTGCATTTATAGTTCTTGGAAATATTTTTCTTGTCGCCTTTGGAAACCACCAGTCCCCTGTTTAT…
Tc04v2_t015960	tcMGT11	ATGGGGATGTCAATCGACAATGTTCGTGGACTTGTTATGGCTGTCTCTTCAAGCATTTTTATTGGATCTAGCTTTATTATCAAGAAGAAGGGTCTTAAAAAGGCTGGAGCAACTGGAACCCGAGCTGGCCAAGGAGGGCACTCTTATTTGTATGAACCTTGGTGGTGGGCAGGGATGATAACTATGATAGTTGGGGAGATAGCTAATTTCGCTGCTTATGCGTATGCTCCTGCAGTTCTCGTAACACCATTGGGAGCTTTAAGTATTATTTTCAGTGCAGTGCTAGCCCATTTCATCCTGGAGGAGAGATTACACATCTTTGGTGTGCTTGGATGTGCTCTGTGTGTGGTGGGCTCTACGACTATTGTTTTACATGCTCCACAGGAAAGAAATATTGAA…
Tc04v2_t020050	tcMGT12	ATGGCGCACGTGGTGCCGGCGGACCCACAGGCAGTGGTGACGGTGAAGAAGAAGGCGCAGCCGTCTCGAAGTTGGGTCCTTTTGGACAGCACGGGGGAGACCACCGTGCTCGAGGTCGACAAATATGCCATCATGCATCGAGTTAACATTCATGCCCGTGATTTGCGTATCCTCGACCCTCTCTTGTCTTACCCTTCTACCATTCTCGGTCGTGATGGAGCTATTGTCTTAAATTTGGAGCATATCAAGGCAATTATTACTTCTGAGGAGGTATTGCTTCGAGATCCATCAGATGAATATGTTGTCCCTGTTGTTCAAGAACTTCAGAGGCGTTTGCCTCCAGTGAATGCCTTCCACCAAGGTCAGGAATATACAGGTGGCCAAAATGATGTTGAAGCA…
Tc06v2_t003480	tcMGT13	ATGGCCGAATCTGCATTGCCAGAAAACAATGGAGATCATGCCGTTCCTAAGATAAAGCTTGGAGGCGGTTTTTATTACCTCCACAACCGGAGGCTAGGACAAGGCCCCAGAAATTGGATCCGTGTTGATGCGCTTGGGAATTCCCAGGTCATCGAGGTTGATAAGCTCACTATGAAGCATCATTGTGATCTCCCAGCTCGGGATATACGGCTTCTCGATCCTCTGCTTGTTTACCCCTCAACGATCCTTGTTAGGGAGAAGGCTATTGTTGTAAATATGGAGCAGATACGATGTATCATCACTGCTGACGAGTTTTTACTTTTAAATTCCCGTGATAGCTCTGTTTTGCAGCATGTGGAAGAGCTACAAAGGCGACTGAAGAGTGGAGTAGGTGATGAT…
Tc06v2_t003490	tcMGT14	ATGGATGTATTGGAGTTCCCGGAGACAGGCCAAGGCCTCCGATCTTGGATTCGTGTTGATGCGTCGGCAAATTCCCAAGCACTTGAGATCGACAAGTTGACCATAATACGTCGTTGTGGTATATCAACTCGTGATCTACGGATTCTTGACCCCCTGTTTGTTTACCCCCCAACCATCCTTGGTAGAGAGAAGGCTATCGTTGCTAATTTGGAGAAGATGCGGTGTATTATCACCGCTGACGAGGTCCTGCTCTTGAATACCCTTGACAGAAACGTTTTGCAGTACGTGATGGAGCTGCAGAAACGACTAAGAAGCACTGGAGTAGCTGAATTGAACCCAGGAGGCAGCGGTTCCAGGAGTTTTAGGAGCACGTCTTCCTATAGTCCCTTCGAGTTTAGG…
Tc06v2_t003500	tcMGT15	ATGGCAGACCTCAAAGAGCGTCTGCTTCCACCAAAACCTCAATCGGCTGTAAACCTTAGAGATGCTTCTTATCGGGCATCTGCTTCTGGACGTCAACCTTTCCAAGGAATGGATTTATTGGGGTTAAAGAAGCGGGGTCAAGGACTTAGATCTTGGATCCGTGTTGACACATCTGGGAATTCCCAGATCATTGAGGTTGACAAGTTCACTATGATGCGTCGTTGTGATCTACCAGCCCGGGATCTACGGCTTCTTGATCCTTTGTTTGTTTACCCCTCGACAATCCTTGGTAGAGAGAAGGCTATTGTTGTAAATTTAGAGCAGATACGGTGTATTATCACTGCTGATGAGGTTCTACTCTTGAATTCCCTTGATAGCTATGTTTTGCAGTATGTTGTG…
Tc06v2_t012890	tcMGT16	ATGAGTGAGAAGGAGGATCACTCTGTTTCTCAAAAGAACAAAATGAAGATGCCAGAAAGACATAAGCATATTCCAAGTAGAGATGTCGTGCCTGGGAGTGATCTTTGGACAGATGGGCTTATTTGTGCTTTTGAATTTATTCGAGGCCATAAGAAACCAATGAACTCAAAATACAGTTCAAGGGTCCAAAGCAAACGATTAGATGACGAATCTTTAAAGGTGCAAATGCCAGCCAATGGACTAACTGAGGGTTCTTCTCCACGACTGGATGGACAGAAACTAATGAAGTCCTCTTCCAGTTATGAATTAAGGGATAATGTGGCTGCTTCTTTTGACGAATACAGAGATGGCCCGAACCTCCAATCAGGCCAGTTTCATGCTATGGAAAGATTTGATGGA…
Tc09v2_t020330	tcMGT17	ATGGGTTTGTCTCAAGACAATCTAAAAGGTGTTGTTTTGGCATTGTTGTCAAGTGGGTTTATTGGGGCAAGTTTTATCATTAAAAAGAAAGGTCTTAGAAGAGCTGCCGCTGTTTCCGGTGTTAGAGCTGGTTGTGGTGGATATGCTTATCTTTTGGAGCCTTTATGGTGGTTGGGCATGATCACAATGATTGTTGGAGAGGTTGCAAACTTTGTGGCATATGCATTTGCTCCGGCAATTCTTGTTACTCCTCTCGGTGCATTAAGCATTATTGTCAGTGCTGTCTTGGCTCAATTCATGTTGAAGGAGAAGTTACAACCGCTAGGCGTTTTAGGATGTGTTATGTGTATTTCGGGTTCAGTCGTAATTGTTATCCATGCACCACAAGAGAGCCCTATC…
Tc09v2_t024580	tcMGT18	ATGGCGCTAACTCCCTCTCCTTCTTCTTCTTATCCAAATCTTCTCCAATTCTCTGTTAAATCTCCATCTCCGTCCGTACATTATCTTCTCTTCGGTTCTCCATGGTCAAACGCTTCTCCGTTTCTGCTTCAAAAGAGCGGAGTTCCTCTGCTTCCGGTCGTAGTGAAACCGTCTTGTAAGAAGATCAAGTGCTTCGCTAGATCCTCAACGGAGGAGGACTGCTTGAGCGAGCCGGAAACATTGACCGCTGAGAATGTTGGTGAAGATGATGATGGTTTAGGGAGGGAAGATCCGAACTTGCAGGAAAGCCAAAGTTCTGTGGTTGCGACGCAGAGGATCACTTCCTCTTCCAGTGATTCTCTCTTGCTTGGAATTCGTGAGCCTGTCTATGAGGTGGTA…
