# Supplementary material
Source: Preprints.org preprint supplement (doi:10.20944/preprints202107.0613.v1)
Supplement: Supplementary file 3 [file Table S2.xlsx]

## Sheet: Sheet1
Organism	Gene ID	Gene name	Description	Chromosome Location	Gene (bp)	Peptide (aa)	Domain	MW (kDa)	pI	Exon	Subcellualar localization
Corchorus capsularis	CCACVL1_04197	ccMGT01	Magnesium transporter NIPA	contig07099:11602-15239	1303	434	PF05653	48.3686	8.24	13	Plasma membrane
	CCACVL1_06282	ccMGT02	Magnesium transporter, CorA-like/Zinc transport protein	contig08034:1063-4310	1500	499	PF01544	56.3004	5.66	7	Endomembrane system
	CCACVL1_06479	ccMGT03	Magnesium transporter MRS2/LPE10	contig08097:27639-30100	1260	419	PF01544	46.9989	5.23	6	Endomembrane system
	CCACVL1_06907	ccMGT04	Magnesium transporter NIPA	contig08254:18778-21377	966	321	PF05653	34.9373	8.6	8	Plasma membrane
	CCACVL1_10058	ccMGT05	Magnesium transporter MRS2/LPE10	contig09593:119905-122672	1218	405	PF01544	45.8681	5.99	5	Endomembrane system
	CCACVL1_10059	ccMGT06	Magnesium transporter MRS2/LPE10	contig09594:31-2143	921	307	PF01544	34.6667	5.22	4	Nucleus
	CCACVL1_10060	ccMGT07	Magnesium transporter, CorA-like/Zinc transport protein	contig09594:7117-8637	789	262	PF01544	29.8182	4.9	4	Endomembrane system
	CCACVL1_14415	ccMGT08	Magnesium transporter, CorA-like/Zinc transport protein	contig10590:73080-76930	1170	389	PF01544	44.0031	4.79	11	Endomembrane system
	CCACVL1_16275	ccMGT09	Magnesium transporter NIPA	contig11061:14936-23613	2004	667	PF05653	73.9117	6.61	21	Endomembrane system
	CCACVL1_16701	ccMGT10	Magnesium transporter NIPA	contig11126:46680-50170	1005	334	PF05653	35.9453	6.29	9	Endomembrane system
	CCACVL1_16896	ccMGT11	Magnesium transporter, CorA-like/Zinc transport protein	contig11152:102812-105673	1374	457	PF01544	50.4579	5.84	4	Organelle membrane
	CCACVL1_17107	ccMGT12	Magnesium transporter, CorA-like/Zinc transport protein	contig11177:42943-45516	1323	440	PF01544	49.1098	4.8	6	Organelle membrane
	CCACVL1_17163	ccMGT13	Magnesium transporter, CorA-like/Zinc transport protein	contig11185:83134-97559	7254	2417	PF01544	268.425	5.59	18	Plasma membrane
	CCACVL1_25517	ccMGT14	Magnesium transporter MRS2/LPE10	contig14256:59192-63512	1509	502	PF01544	55.518	5.83	14	Endomembrane system
	CCACVL1_29622	ccMGT15	Magnesium transporter NIPA	contig15735:3285-6907	879	292	PF05653	31.0294	5.45	8	Endomembrane system
	CCACVL1_30870	ccMGT16	Magnesium transporter, CorA-like/Zinc transport protein	contig16445:5592-10628	2628	875	PF01544	98.4533	8.13	9	Plasma membrane
Gossypium hirsutum	Gohir.A01G024300	ghMGT01	Magnesium transporter MRS2-2	A01 : 2,550,849-2,555,255	1155	384	PF01544	42.5808	4.9	11	Endomembrane system
	Gohir.A01G182300	ghMGT02	Magnesium transporter NIPA4	A01 : 95,474,023-95,478,767	1023	340	PF05653	36.8995	7	10	Endomembrane system
	Gohir.A02G019800	ghMGT03	Magnesium transporter NIPA2	A02 : 2,253,195-2,257,484	969	322	PF05653	35.4481	9.18	9	Plasma membrane
	Gohir.A03G203400	ghMGT04	Magnesium transporter NIPA6	A03 : 107,552,283-107,556,705	1011	336	PF05653	32.6578	6.99	10	Endomembrane system
	Gohir.A03G214800	ghMGT05	Magnesium transporter NIPA4	A03 : 108,391,959-108,395,874	1050	349	PF05653	38.0989	7.04	10	Endomembrane system
	Gohir.A04G121700	ghMGT06	Magnesium transporter MRS2-4	A04 : 79,549,906-79,552,627	1143	380	PF01544	50.2466	5.71	4	Endomembrane system
	Gohir.A04G130300	ghMGT07	Magnesium transporter NIPA3	A04 : 80,719,887-80,723,861	1,035	344	PF05653	37.5614	7.66	9	Endomembrane system
	Gohir.A06G114600	ghMGT08	Magnesium transporter MRS2-1	A06 : 61,560,525-61,571,256	1329	442	PF01544	50.1947	5.12	8	Endomembrane system
	Gohir.A07G022000	ghMGT09	Magnesium transporter NIPA9	A07 : 2,467,630-2,470,692	1092	363	PF05653	37.2005	9.57	9	Plasma membrane
	Gohir.A07G121500	ghMGT10	Magnesium transporter NIPA3	A07 : 23,980,721-23,984,762	1050	349	PF05653	37.993	6.65	9	Plasma membrane
	Gohir.A07G209600	ghMGT11	Magnesium transporter MRS2-2	A07 : 90,246,444-90,251,545	1188	395	PF01544	44.6739	4.93	11	Endomembrane system
	Gohir.A08G061600	ghMGT12	Magnesium transporter MRS2-2	A08 : 9,822,036-9,827,001	1185	394	PF01544	44.8411	4.76	11	Endomembrane system
	Gohir.A09G086400	ghMGT13	Magnesium transporter MRS2-11, chloroplastic	A09 : 60,306,909-60,312,792	1338	445	PF01544, PF01544	50.2261	9.11	15	Organelle membrane
	Gohir.A10G123900	ghMGT14	Magnesium transporter CorA family protein	A10 : 60,241,126-60,244,976	1158	385	PF01544	42.8738	4.77	11	Endomembrane system
	Gohir.A11G059200	ghMGT15	Magnesium transporter NIPA6	A11 : 5,491,648-5,497,250	711	236	PF05653	37.6904	7.54	10	Endomembrane system
	Gohir.A11G061900	ghMGT16	Magnesium transporter NIPA8	A11 : 5,734,680-5,739,284	1335	444	PF05653	49.2062	7.05	14	Endomembrane system
	Gohir.A12G038900	ghMGT17	Magnesium transporter NIPA6	A12 : 7,290,808-7,294,972	1005	334	PF05653	36.0755	7.61	8	Endomembrane system
	Gohir.A12G161100	ghMGT18	Magnesium transporter MRS2-5	A12 : 88,015,502-88,019,860	1254	417	PF01544	46.7557	5.53	8	Endomembrane system
	Gohir.A13G047400	ghMGT19	Magnesium transporter MRS2-3	A13 : 6,442,722-6,446,432	1380	459	PF01544	44.8643	4.86	7	Endomembrane system
	Gohir.A13G223600	ghMGT20	Magnesium transporter MRS2-11, chloroplastic	A13 : 103,576,945-103,582,360	1392	463	PF01544	51.3975	5.68	13	Endomembrane system
	Gohir.D01G008900	ghMGT21	Magnesium transporter MRS2-3	D01 : 777,434-781,101	750	249	PF01544	53.9468	4.77	6	chloroplast
	Gohir.D01G022300	ghMGT22	Magnesium transporter MRS2-2	D01 : 1,984,273-1,988,904	1161	386	PF01544	42.709	4.9	11	Endomembrane system
	Gohir.D01G173400	ghMGT23	Magnesium transporter NIPA4	D01 : 57,571,112-57,575,881	1023	340	PF05653	36.8995	7	10	Plasma membrane
	Gohir.D02G023100	ghMGT24	Magnesium transporter NIPA2	D02 : 2,971,918-2,976,298	969	322	PF05653	35.3328	9	9	Plasma membrane
	Gohir.D02G224700	ghMGT25	Magnesium transporter NIPA6	D02 : 69,647,083-69,651,052	954	317	PF05653	32.6578	6.99	10	Endomembrane system
	Gohir.D02G236300	ghMGT26	Magnesium transporter NIPA4	D02 : 70,409,832-70,413,784	1035	344	PF05653	37.5442	7.66	9	Endomembrane system
	Gohir.D04G163500	ghMGT27	Magnesium transporter MRS2-4	D04 : 53,231,131-53,234,421	1371	456	PF01544	50.2466	5.71	4	Organelle membrane
	Gohir.D04G175500	ghMGT28	Magnesium transporter NIPA3	D04 : 54,564,749-54,569,005	1032	343	PF05653	37.4062	7.66	9	Endomembrane system
	Gohir.D06G119200	ghMGT29	Magnesium transporter MRS2-1	D06 : 35,302,729-35,309,142	1329	442	PF05653	50.2268	5.12	8	Endomembrane system
	Gohir.D07G021900	ghMGT30	Magnesium transporter NIPA9	D07 : 2,345,058-2,347,554	633	210	PF05653	37.2005	9.57	9	Endomembrane system
	Gohir.D07G125800	ghMGT31	Magnesium transporter NIPA3	D07 : 19,011,557-19,015,601	1050	349	PF05653	37.8927	6.59	9	Plasma membrane
	Gohir.D07G215700	ghMGT32	Magnesium transporter MRS2-2	D07 : 54,407,372-54,412,545	1188	395	PF01544	44.6639	5.02	11	Endomembrane system
	Gohir.D08G070700	ghMGT33	Magnesium transporter MRS2-7	D08 : 9,205,704-9,210,708	1185	394	PF01544	44.7951	4.8	11	Endomembrane system
	Gohir.D09G090700	ghMGT34	Magnesium transporter MRS2-1	D09 : 35,593,621-35,609,110	1314	437	PF01544	49.541	5.06	6	Endomembrane system
	Gohir.D10G152400	ghMGT35	Magnesium transporter CorA family protein	D10 : 38,658,628-38,662,549	1158	385	PF01544	42.8738	4.77	11	Endomembrane system
	Gohir.D11G063300	ghMGT36	Magnesium transporter NIPA6	D11 : 5,532,981-5,538,563	1038	345	PF05653	37.6904	7.54	10	Endomembrane system
	Gohir.D11G065800	ghMGT37	Magnesium transporter NIPA8	D11 : 5,712,127-5,716,811	1335	444	PF05653	49.2373	6.66	15	Endomembrane system
	Gohir.D12G033500	ghMGT38	Magnesium transporter NIPA6	D12 : 4,339,448-4,343,502	1005	334	PF05653	36.0284	6.58	9	Endomembrane system
	Gohir.D12G164400	ghMGT39	Magnesium transporter MRS2-5	D12 : 51,089,641-51,094,050	1254	417	PF01544	46.7247	5.63	8	Endomembrane system
	Gohir.D13G045700	ghMGT40	Magnesium transporter MRS2-3	D13 : 5,698,572-5,702,374	1380	459	PF01544	53.9468	4.77	6	Endomembrane system
	Gohir.D13G228400	ghMGT41	Magnesium transporter MRS2-11, chloroplastic	D13 : 63,780,201-63,787,059	1425	474	PF01544	52.5999	5.4	14	Endomembrane system
Theobroma cacao	Tc01v2_g013790	tcMGT01	Magnesium transporter CorA family protein	I: 9,856,412-9,861,320	1909	632	PF01544	70.9059	6.14	8	Endomembrane system
	Tc01v2_g019400	tcMGT02	Magnesium transporter NIPA6	I: 19,125,708-19,144,339	1837	359	PF05653	35.4477	7.8071	9	Endomembrane system
	Tc01v2_g022150	tcMGT03	Magnesium transporter MRS2-7	I: 28,716,956-28,722,495	1785	393	PF01544	43.5487	4.7016	11	Endomembrane system
	Tc02v2_g001960	tcMGT04	Magnesium transporter NIPA4	II: 1,356,068-1,361,088	2184	344	PF05653	37.3171	7.7243	9	Endomembrane system
	Tc02v2_g005250	tcMGT05	Magnesium transporter NIPA6	II: 3,283,985-3,288,344	1895	334	PF05653	32.7528	7.3434	9	Endomembrane system
	Tc02v2_g007390	tcMGT06	Magnesium transporter MRS2-4	II: 4,548,131-4,554,224	1975	458	PF01544	50.3617	5.6809	4	Organelle membrane
	Tc02v2_g009780	tcMGT07	Magnesium transporter MRS2-3	II: 5,964,512-5,967,760	1783	475	PF01544	52.9178	4.4791	6	Organelle membrane
	Tc02v2_g010340	tcMGT08	Magnesium transporter CorA-like family protein isoform 1	II: 6,324,303-6,328,097	2632	453	PF01544	51.317	8.0275	5	Endomembrane system
	Tc02v2_g028490	tcMGT09	Magnesium transporter MRS2-5	II: 39,450,323-39,455,210	1815	418	PF01544	46.6935	5.51	7	Endomembrane system
	Tc04v2_g004370	tcMGT10	Magnesium transporter NIPA8	IV: 3,355,227-3,360,617	2209	446	PF05653	49.466	8.568	15	Endomembrane system
	Tc04v2_g015960	tcMGT11	Magnesium transporter NIPA2	IV: 25,905,455-25,908,917	1647	321	PF05653	35.0995	8.4475	9	Plasma membrane
	Tc04v2_g020050	tcMGT12	Magnesium transporter MRS2-2	IV: 28,612,676-28,616,651	1643	386	PF01544	42.998	4.5562	11	Endomembrane system
	Tc06v2_g003480	tcMGT13	Magnesium transporter MRS2-1	VI: 4,236,591-4,238,448	1458	424	PF01544	47.669	6.0715	5	Endomembrane system
	Tc06v2_g003490	tcMGT14	Magnesium transporter MRS2-1	VI: 4,247,962-4,250,059	1212	403	PF01544	45.4077	5.5713	5	Endomembrane system
	Tc06v2_g003500	tcMGT15	Magnesium transporter MRS2-1	VI: 4,251,336-4,258,156	2104	442	PF01544	50.2308	4.8491	8	Endomembrane system
	Tc06v2_g012890	tcMGT16	Magnesium transporter CorA-like family protein	VI: 22,281,121-22,285,798	2237	587	PF01544	64.7912	6.7858	8	Endomembrane system
	Tc09v2_g020330	tcMGT17	Magnesium transporter NIPA3	IX: 30,700,769-30,705,630	1779	394	PF05653	37.5825	7.239	9	Plasma membrane
	Tc09v2_g024580	tcMGT18	Magnesium transporter MRS2-11, chloroplastic	IX: 34,896,687-34,902,876	1800	457	PF01544	50.8058	5.1592	14	Endomembrane system
