# Supplementary material
Source: Preprints.org preprint supplement (doi:10.20944/preprints202107.0613.v1)
Supplement: Supplementary file 4 [file Table S3- Ka-Ks.xlsx]

## Sheet: Sheet1
Organism	Gene 1	Gene Name	Gene 2	Gene Name	Ka	Ks	Ka/Ks	Duplication time (MYA)
Theobroma cacao	Tc06v2_t003490	tcMGT14	Tc06v2_t003500	tcMGT15	0.0461328	0.106584	0.432828	8.19881
	Tc06v2_t003480	tcMGT13	Tc06v2_t003500	tcMGT15	0.0418951	0.124274	0.337118	9.55957
	Tc02v2_t005250	tcMGT03	Tc02v2_t001960	tcMGT04	0.0853715	0.167639	0.509257	12.8953
	Tc02v2_t005250	tcMGT03	Tc09v2_t020330	tcMGT17	0.0836124	0.132941	0.628945	10.2262
	Tc02v2_t005250	tcMGT03	Tc01v2_t019400	tcMGT02	0.0630242	0.167391	0.376509	12.8762
	Tc02v2_t001960	tcMGT04	Tc04v2_t015960	tcMGT11	0.0665035	0.982892	0.0676611	75.6071
	Tc06v2_t012890	tcMGT16	Tc01v2_t013790	tcMGT01	0.092976	0.135022	0.688599	10.3863
	Tc01v2_t022150	tcMGT03	Tc04v2_t020050	tcMGT12	0.0401984	0.163148	0.246392	12.5499
Corchorus capsularis	CCACVL1_10059	ccMGT06	CCACVL1_10060	ccMGT07	0.104135	0.291425	0.357331	22.4173
	CCACVL1_06907	ccMGT04	CCACVL1_16275	ccMGT05	0.184444	1.34382	0.137254	103.371
	CCACVL1_10058	ccMGT05	CCACVL1_10060	ccMGT07	0.149911	0.330373	0.453762	25.4133
	CCACVL1_06282	ccMGT02	CCACVL1_30870	ccMGT16	0.753566	0.452637	1.66484	34.8182
	CCACVL1_10059	ccMGT06	CCACVL1_10058	ccMGT05	0.14112	0.43472	0.324622	33.44
Gossypium hirsutum	Gohir.A01G024300	ghMGT01	Gohir.D01G022300	ghMGT22	0.0260154	0.151765	0.171419	11.6742
	Gohir.A01G182300	ghMGT02	Gohir.A03G214800	ghMGT05	0.0354583	0.198023	0.179062	15.2325
	Gohir.A01G182300	ghMGT02	Gohir.D01G173400	ghMGT23	0.0260154	0.339738	0.0765751	26.1337
	Gohir.A01G182300	ghMGT02	Gohir.D02G236300	ghMGT26	0.0354583	0.407664	0.0869793	31.3588
	Gohir.A02G019800	ghMGT03	Gohir.D02G023100	ghMGT24	0.0264709	0.330235	0.0801578	25.4027
	Gohir.A03G203400	ghMGT04	Gohir.D02G224700	ghMGT25	0.0686229	0.663518	0.103423	51.0398
	Gohir.A03G214800	ghMGT05	Gohir.D01G173400	ghMGT23	0.0510836	0.229787	0.222309	17.6759
	Gohir.A03G214800	ghMGT05	Gohir.D02G236300	ghMGT26	0.028	0.664163	0.0421583	51.0895
	Gohir.A04G121700	ghMGT06	Gohir.D04G163500	ghMGT27	0.022	0.542075	0.0405848	41.6981
	Gohir.A04G130300	ghMGT07	Gohir.D04G175500	ghMGT28	0.031	0.232209	0.1335	17.8622
	Gohir.A06G114600	ghMGT08	Gohir.D06G119200	ghMGT29	0.036	0.211723	0.170034	16.2864
	Gohir.A07G121500	ghMGT10	Gohir.D07G125800	ghMGT31	0.044	0.737066	0.0596961	56.6974
	Gohir.A07G209600	ghMGT11	Gohir.D07G215700	ghMGT32	0.081	0.634296	0.127701	48.792
	Gohir.A08G061600	ghMGT12	Gohir.D08G070700	ghMGT33	0.011	0.93109	0.0118141	71.6223
	Gohir.A10G123900	ghMGT14	Gohir.D10G152400	ghMGT35	0.054	0.531899	0.101523	40.9153
	Gohir.A11G059200	ghMGT15	Gohir.D11G063300	ghMGT36	0.078	0.686301	0.113653	52.7924
	Gohir.A11G061900	ghMGT16	Gohir.D11G065800	ghMGT37	0.019	0.377469	0.0503353	29.0361
	Gohir.A12G038900	ghMGT17	Gohir.D12G033500	ghMGT38	0.029	0.332439	0.0872341	25.5722
	Gohir.A12G161100	ghMGT18	Gohir.D12G164400	ghMGT39	0.043	1.55285	0.0276909	119.45
	Gohir.A13G047400	ghMGT19	Gohir.D13G045700	ghMGT40	0.065	0.790547	0.0822215	60.8113
	Gohir.A13G223600	ghMGT20	Gohir.D13G228400	ghMGT41	0.081	0.791474	0.102341	60.8826
	Gohir.D01G173400	ghMGT23	Gohir.D02G236300	ghMGT26	0.028	0.887753	0.0315403	68.2887
