# Supplementary material
Source: Preprints.org preprint supplement (doi:10.20944/preprints202107.0613.v1)
Supplement: Supplementary file 5 [file Table S4- promoter analysis.xlsx]

## Sheet: Sheet1
Element		ABRE	ARE	Box 4	CAT-box	G-box	GARE-motif	HD-Zip 3	MRE	MYB	TCA	W box	WUN-motif	TGACG-motif	TGA-element	MBS	P-box	AT-rich sequence	AuxRR-core	GC-motif	LTR	TC-rich repeats	circadian
Gene	Gene ID	abscisic acid responsiveness	essential for the anaerobic induction	light responsiveness	related to meristem expression	light responsiveness	gibberellin-responsive element	protein binding site	MYB binding site involved in light responsiveness	stress responsive	salicylic acid responsiveness	WORKY binding site involved in drought-inducibility	wonding responsiveness	involved in the MeJA-responsiveness	auxin-responsive element	MYB binding site involved in drought-inducibility	gibberellin-responsive element	maximal elicitor-mediated activation	involved in auxin responsiveness	involved in anoxic specific inducibility	involved in low-temperature responsiveness	involved in defense and stress responsiveness	involved in circadian control
CCACVL1_04197	ccMGT01	3	3		1	5		1	1	3			2		1	1					1
CCACVL1_06282	ccMGT02	4	1	2	1	2		1		3			1							1	1
CCACVL1_06479	ccMGT03	5		2		2				6	4	1		3	1	1			1				1
CCACVL1_06907	ccMGT04	6	3	4	1	2				3			1			1				1	1	1	1
CCACVL1_10058	ccMGT05	5	1	8		5		1	1	12	1	1	2	1
CCACVL1_10059	ccMGT06	5	3	1		1		1		7	1	1	2	2	1	1					2
CCACVL1_10060	ccMGT07	3	2	2		4	1			8	3		1	3		2	1			1		2
CCACVL1_14415	ccMGT08	9	1	4		2	1	1	1	7		1		2		3	1					1
CCACVL1_16275	ccMGT09	6	3	5		2	1			2	2						1		1			1
CCACVL1_16701	ccMGT10	4	1	7		3				3	1			1	1						1	1
CCACVL1_16896	ccMGT11	5	1	4		3	11		3	1		1		2			7		1
CCACVL1_17107	ccMGT12	5	1	1		2				4			1	2	2
CCACVL1_17163	ccMGT13	2		7	1	2				2	1			1								2
CCACVL1_25517	ccMGT14	2	5	11	1	1				7	3		4		1			1			1
CCACVL1_29622	ccMGT15	2		5	2	5				6		1
CCACVL1_30870	ccMGT16	1	1	4		15		1	1	9		1				3
Gohir.A01G024300	ghMGT01	3	3	7	1	2		1	1	5				2	2	1			1
Gohir.A01G182300	ghMGT02		1	4		4		5	2	7			1	1	1	1					1
Gohir.A02G019800	ghMGT03	4	1			1	2		1	9	2	1	1	4							1
Gohir.A03G203400	ghMGT04	3	6	5	1	6				6		1	1			1					1	1	1
Gohir.A03G214800	ghMGT05	4	3	8		5		1	1	5			2		1	1		1			1
Gohir.A04G121700	ghMGT06	1	4	6		5				1	1		3	4		3	2	1		1
Gohir.A04G130300	ghMGT07	1	1	3		1				4			1	2	2
Gohir.A06G114600	ghMGT08	12	3	2		2	1			7		1	1	1	2	1
Gohir.A07G022000	ghMGT09	1	2	2		4		1		2	1		2	2	1	1					2
Gohir.A07G121500	ghMGT10	1	3	2		1		1		7	1		2	3	1	1					2
Gohir.A07G209600	ghMGT11	5	2	2		2				2	1	2		1	1		1				1	1
Gohir.A08G061600	ghMGT12	3		2		4				9		1	1			1					1	1	1
Gohir.A09G086400	ghMGT13	4	2	2		3		1	1	6			2		1	1		1			1
Gohir.A10G123900	ghMGT14	6			1	2				9	4			3	1	1			1				1
Gohir.A11G059200	ghMGT15	5		5	1	15				6	1		1			1	1		1		1
Gohir.A11G061900	ghMGT16	5	1	6	1	5				13	3	1	4		1						1
Gohir.A12G038900	ghMGT17	9	1	2	2	5			1	12	1	1	3			1				1		2	2
Gohir.A12G161100	ghMGT18	2	1	5		5				7		1
Gohir.A13G047400	ghMGT19	2	1	5	1	7	11		3	3				2					1
Gohir.A13G223600	ghMGT20	3	1	4	2	1	1	1	1	3				2		3						1
Gohir.D01G008900	ghMGT21	1	2	6		2				13	1	1		1			11					2
Gohir.D01G022300	ghMGT22	3	2	2	1	4	1	1	1	4				2		3						1
Gohir.D01G173400	ghMGT23	1	5	2		3				6	1	1		1			1					2
Gohir.D02G023100	ghMGT24	4	3	9	2	2		1	1	8						3
Gohir.D02G224700	ghMGT25			5		2	1			3		1	1	2	1	1	1					1
Gohir.D02G236300	ghMGT26	5	1	5	1	4				9	1		1			1			1		1
Gohir.D04G163500	ghMGT27	5	1	2	1	4				15	3	1	4		1						1
Gohir.D04G175500	ghMGT28	9	4	2	1	6			1	9	1	1	3			1	1			1		2	2
Gohir.D06G119200	ghMGT29	2	3	8	2	5				9		1
Gohir.D07G021900	ghMGT30	3	3	5		1		1	1	3	1		2	1
Gohir.D07G125800	ghMGT31	1	2	6		2		1		13	1		2	2	1	1					2
Gohir.D07G215700	ghMGT32	1	1	1	1	2		1		4	1		2	3	1	1					2
Gohir.D08G070700	ghMGT33	5	1	4	1	15				6	1	2		1	1						1	1
Gohir.D09G090700	ghMGT34	4	2	4		5		1	1	7			2		1	1		1			1
Gohir.D10G152400	ghMGT35	1	2	5	1	3				3			1	2	2
Gohir.D11G063300	ghMGT36	12	2	8	1	3	1			3		1	1	1	2	1
Gohir.D11G065800	ghMGT37	4	7	2	1	2	1			2	3		1	3		2						2
Gohir.D12G033500	ghMGT38	6	1	2	2	5			1	12	1		2		1						1
Gohir.D12G164400	ghMGT39	3		11		2		1	1	6				2	2	1	1		1	1
Gohir.D13G045700	ghMGT40	4	2	5		1	2	1	1	7	2	1	1	4							1	1
Gohir.D13G228400	ghMGT41	1	5	6		3			1	6		1	1	2	2	1		1					1
Tc01v2_g013790	tcMGT01	9		2		4	1		1	7	1	1	3			3						2	2
Tc01v2_g019400	tcMGT02	5	5	2		1	1		1	7	1		1			3			1		1
Tc01v2_g022150	tcMGT03	6	2	8		6				5	2	2					1		1	1		2
Tc02v2_g001960	tcMGT04	1	6	6	1	2	1			2		1	1	2	2
Tc02v2_g005250	tcMGT05	1	1	5	1	3		1		3	1		3	4		1						2
Tc02v2_g007390	tcMGT06	5	3	4	2	2		1	1	7	1			1	1						1	1
Tc02v2_g009780	tcMGT07	1	1	7	1	5				5	1		2	3	1	1					2
Tc02v2_g010340	tcMGT08	5	3	2		2				2	3		4		1						1
Tc02v2_g028490	tcMGT09		5	11	2	5				7			1	1	1	1					1
Tc04v2_g004370	tcMGT10	12	3	1	2	5				12		1	1	1	2		1					1
Tc04v2_g015960	tcMGT11	1	4	4	1	2		1		6	1	1	2	2	1	1				1	2
Tc04v2_g020050	tcMGT12	3		6	1	5	11			1	1	1	2	1
Tc06v2_g003480	tcMGT13	4	4	7		5			1	7	2	1	1	4		1	2				1
Tc06v2_g003490	tcMGT14	3	2	2		6	1	1	1	6		1		2	2	1			1	1		1
Tc06v2_g003500	tcMGT15	3	3	5		1				3			1					1			1		1
Tc06v2_g012890	tcMGT16	4	3	5		1			1	6			2		1			1			1	1
Tc09v2_g020330	tcMGT17	6	2	3	1	5				4	4			3	1				1			1	1
Tc09v2_g024580	tcMGT18	3	2			4				9			1			1		1			1	2	1
